# Supplementary material for: Mental health status and risk of new cardiovascular events or death in patients with myocardial infarction: a population-based cohort study
Source: PubMed Central journal article supplement — BMJ Open. 2013 Aug 2;3(8):e003045. doi: 10.1136/bmjopen-2013-003045 (PMC3733312; doi:10.1136/bmjopen-2013-003045), 2013-08-02
Supplement: bmjopen-2013-003045.draft_revisions.pdf [file bmjopen-2013-003045.draft_revisions.pdf]

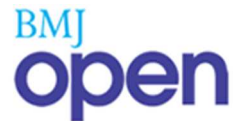

**Mental health status and risk of new cardiovascular events  
or death in patients with myocardial infarction: a  
population-based cohort study**

|                                 |                                                                                                                                                                                                                                                                                                                                                                                                                                                                                                                                                                                                                        |
|---------------------------------|------------------------------------------------------------------------------------------------------------------------------------------------------------------------------------------------------------------------------------------------------------------------------------------------------------------------------------------------------------------------------------------------------------------------------------------------------------------------------------------------------------------------------------------------------------------------------------------------------------------------|
| Journal:                        | <i>BMJ Open</i>                                                                                                                                                                                                                                                                                                                                                                                                                                                                                                                                                                                                        |
| Manuscript ID:                  | bmjopen-2013-003045                                                                                                                                                                                                                                                                                                                                                                                                                                                                                                                                                                                                    |
| Article Type:                   | Research                                                                                                                                                                                                                                                                                                                                                                                                                                                                                                                                                                                                               |
| Date Submitted by the Author:   | 12-Apr-2013                                                                                                                                                                                                                                                                                                                                                                                                                                                                                                                                                                                                            |
| Complete List of Authors:       | Nielsen, Tine; Section for General Medical Practice, Department of Public Health, Aarhus University<br>Vestergaard, Mogens; Section for General Medical Practice and Research Unit for General Practice, Department of Public Health, Aarhus University<br>Christensen, Bo; Section for General Medical Practice, Department of Public Health, Aarhus University<br>Christensen, Kaj; Research Unit for General Practice, Department of Public Health, Aarhus University<br>Larsen, Karen; Section for General Medical Practice and Research Unit for General Practice, Department of Public Health, Aarhus University |
| <b>Primary Subject Heading</b>: | Cardiovascular medicine                                                                                                                                                                                                                                                                                                                                                                                                                                                                                                                                                                                                |
| Secondary Subject Heading:      | Mental health, Epidemiology                                                                                                                                                                                                                                                                                                                                                                                                                                                                                                                                                                                            |
| Keywords:                       | CARDIOLOGY, Myocardial infarction < CARDIOLOGY, MENTAL HEALTH, Epidemiology < TROPICAL MEDICINE                                                                                                                                                                                                                                                                                                                                                                                                                                                                                                                        |
|                                 |                                                                                                                                                                                                                                                                                                                                                                                                                                                                                                                                                                                                                        |

SCHOLARONE™  
Manuscripts

1  
2  
3  
4  
5  
6  
7  
8  
9  
10  
11  
12  
13  
14  
15  
16  
17  
18  
19  
20  
21  
22  
23  
24  
25  
26  
27  
28  
29  
30  
31  
32  
33  
34  
35  
36  
37  
38  
39  
40  
41  
42  
43  
44  
45  
46  
47  
48  
49  
50  
51  
52  
53  
54  
55  
56  
57  
58  
59  
60

## **Mental health status and risk of new cardiovascular events or death in patients with myocardial infarction: a population-based cohort study**

Tine Jepsen Nielsen, Mogens Vestergaard, Bo Christensen, Kaj Sparle Christensen, Karen Kjær Larsen

Section for General Medical Practice, Aarhus University, Bartholins Allé 2, 8000 Aarhus C, Denmark

Tine Jepsen Nielsen  
Junior research fellow

Section for General Medical Practice and Research Unit for General Practice, Aarhus University, Bartholins Allé 2, 8000 Aarhus C, Denmark

Mogens Vestergaard  
Professor

Section for General Medical Practice, Aarhus University, Bartholins Allé 2, 8000 Aarhus C, Denmark

Bo Christensen  
Professor

Research Unit for General Practice, Aarhus University, Bartholins Allé 2, 8000 Aarhus C, Denmark

Kaj Sparle Christensen  
Senior researcher

Section for General Medical Practice and Research Unit for General Practice, Aarhus University, Bartholins Allé 2, 8000 Aarhus C, Denmark

Karen Kjær Larsen  
PhD fellow

Correspondence to: TJ Nielsen. E-mail: [tjn@folkesundhed.au.dk](mailto:tjn@folkesundhed.au.dk)

## ARTICLE SUMMARY

### Article focus

- Myocardial infarction (MI) is often followed by mental health problems such as depression, anxiety, and low mental health status.
- Mounting evidence indicates that depression and anxiety after MI increase the risk of adverse long-term outcome. No previous study has examined the association between mental health status after MI and outcome, independent of depression and anxiety.
- This study examines the association between mental health status after first-time MI and new cardiovascular events or death, when taking into account depression and anxiety as well as clinical, socio-demographic, and behavioural risk factors.

### Key messages

- During three years after the MI, patients with the lowest mental health status had a 50% risk of new cardiovascular events or death.
- Low mental health status after MI was a strong predictor of new cardiovascular events or death, independent of depression, anxiety and clinical, socio-demographic, and behavioural risk factors.

### Strengths and limitations of this study

- Major strengths of this study are its population-based nature and the homogenous study population. The response rate was high, and information on outcome was collected without loss to follow-up.
- We were able to take into account important mediators such as depression, anxiety, and potential behavioural mediators such as physical activity. However, we cannot rule out the possibility of residual confounding.

**Abstract**

**Objective** To examine the association between mental health status after first-time myocardial infarction (MI) and new cardiovascular events or death, taking into account depression and anxiety as well as clinical, socio-demographic, and behavioural risk factors.

**Design** Population-based cohort study based on questionnaires and nationwide registries. Mental health status was assessed three months after the MI using the Mental Component Summary score from the Short-Form 12 version 2.

**Setting** Central Denmark Region.

**Participants** All patients hospitalised with first-time MI from 1 January 2009 through 31 December 2009 (n=880). The participants were categorised in quartiles according to level of mental health status (1<sup>st</sup> quartile=lowest mental health status).

**Main outcome measures** Composite endpoint of new cardiovascular events (MI, heart failure, stroke/transient ischaemic attack) and all-cause mortality.

**Results** During 1,940 person-years of follow-up, 277 persons experienced a new cardiovascular event or died. The cumulative incidence following three years after the MI increased consistently with decreasing mental health status and was 15.0% (95% confidence interval 10.8% to 20.5%) for persons in the fourth quartile 29.1% (23.5% to 35.6%) in the third quartile, 37.0% (30.9% to 43.9%) in the second quartile, and 47.5% (40.9% to 54.5%) in the first quartile. The hazard ratios (HR) were high, even after adjustments for age, socio-demographic characteristics, cardiac disease severity, comorbidity, secondary prophylactic medication, smoking status, physical activity, depression, and anxiety (HR<sub>3rd quartile</sub> 1.90 (95% confidence interval 1.23 to 2.93), HR<sub>2nd quartile</sub> 2.14 (1.37 to 3.33), HR<sub>1st quartile</sub> 2.23 (1.35 to 3.68) when using the fourth quartile as reference).

**Conclusions** Low mental health status following first-time MI was independently associated with an increased risk of new cardiovascular events or death. Further research is needed to disentangle the pathways that link mental health status following MI to prognosis and to identify interventions that can improve both mental health status and prognosis.

## INTRODUCTION

Myocardial infarction (MI) is a severe life event followed by an increased risk of mental health problems such as depression,<sup>1</sup> anxiety,<sup>2</sup> and low mental health status.<sup>3</sup> Several studies have shown that depression<sup>4</sup> and anxiety<sup>2</sup> after MI is associated with a higher risk of cardiovascular events and death, but much less is known about the impact of broader measures of mental health. Mental health status is a generic and broad measure of mental health, which may be useful as a tool to quantify important prognostic aspects of mental health not captured by the more disease-specific measures of depression and anxiety. Four studies<sup>5-8</sup> have investigated the association between mental health status following MI and prognosis. All these have found that low mental health status was significantly associated with increased risk of adverse outcome, independent of clinical risk factors. However, since none of the former studies adjusted for depression or anxiety, it remains unknown whether mental health status in itself adds unique knowledge about the prognosis.

Our aim was to examine the association between mental health status and new cardiovascular events or death in patients with first-time MI when taking into account depression, anxiety, and clinical, socio-demographic, and behavioural risk factors.

## METHODS

We conducted a population-based cohort study comprising people in the Central Denmark Region (1,250,000 inhabitants) with a first-time MI based on data from nationwide registers and questionnaires.

### Participants

We consecutively invited all patients discharged from hospital with a first-time MI from 1 January 2009 to 31 December 2009. The establishment of the cohort is described in detail elsewhere.<sup>9</sup> Data on patients discharged with MI (in accordance with the International Classification of Diseases (ICD-10) code I21)<sup>10</sup> were received from the Danish National Patient Register on a monthly basis. Patients who had been discharged with MI between 1994 and 2008 were excluded to identify first-time cases. Information on name, address, and vital status was obtained from the Civil Registration System,<sup>11</sup> which also provided the unique personal identification number used to link data between the registers and questionnaires.

## Data collection

A pilot-tested hard-copy questionnaire was sent to all participants 12 to 14 weeks after their discharge from hospital, and non-responders received two reminders.<sup>9</sup> The study was approved by the Danish Data Protection Agency (J.nr. 2009-41-3018), the Scientific Research Evaluation Committee of the Danish Academy of General Practitioners (ref. no. 03-2009), and written informed consent was obtained from all participants.

## Mental health status

Mental health status was measured using the Mental Component Summary (MCS) score from the validated Danish version of the Short-Form 12 version 2 Health Survey (SF-12).<sup>12-14</sup> The SF-12 consists of 12 items, the MCS score comprises mainly of the six mental items ('Vitality', 'Role-Emotional' (2 items), 'Social Function', and 'Mental Health' (2 items)), but the six physical items are also included in the computation.<sup>12</sup> The SF-12 scores were calculated following the norm-based scoring algorithm<sup>12</sup> using weights derived from confirmatory factor analysis.<sup>15</sup> The MCS score is thus linearly transformed in a way that allows comparison with the mean score (50) and the standard deviation (SD) (10) in the general US population in 1998.<sup>12</sup> The MCS has demonstrated good construct validity.<sup>15</sup> The wording of the mental health status items can be found in the supplemental material (**eFigure 1**).

## Depression and anxiety

We assessed depression and anxiety symptoms using the Hospital Anxiety and Depression Scale (HADS).<sup>16</sup> The participants were categorised as having anxiety or depression if they had a score of  $\geq 8$  on the HADS-A scale or the HADS-D scale. The HADS was designed to be valid in clinical populations with symptoms of physical disease and hence leaves out items that may be endorsed by physical rather than mental states.<sup>16, 17</sup> The HADS has formerly been validated in MI patients<sup>18, 19</sup> and has proven to have satisfactory reliability (HADS-A and HADS-D Cronbach's  $\alpha \approx 0.80$ ).<sup>18, 20</sup> Among MI patients, a HADS-D $\geq 8$  identified possible cases of depression with a sensitivity of 65% and a specificity of 90% (compared with a diagnosis of depression based on a Structured Clinical Interview for DSM-IV).<sup>19</sup> Among acute coronary syndrome patients, a HADS-A $\geq 8$  identified possible cases of anxiety with a sensitivity of 91% and a specificity of 61% (compared with a diagnosis of generalised anxiety disorder based on a Structured Clinical Interview for DSM-IV).<sup>21</sup>

### Co-morbidity and cardiac disease severity

Information on co-morbidity was retrieved from the Danish National Patient Register,<sup>22</sup> the Danish National Diabetes Register,<sup>23</sup> and the prescription database covering the entire Central Denmark Region.<sup>24</sup> The Danish National Patient Register provided information on stroke (ICD-10: I61, I63, I64), transient cerebral ischemic attack (ICD-10: DG45, DG46), heart failure (ICD-10: I11.0, I13.0, I13.2, I42.0, I42.6, I42.7, I42.9, I50.0, I50.1, I50.9), and revascularization (ICD-10: KFN, KFW) from 1994 to 2008. The Danish National Diabetes Register provided information on diabetes mellitus from 1990 to 2008 according to an algorithm developed on the basis of information from four nationwide registers.<sup>23</sup> The prescription database provided information on all reimbursed drugs according to the Anatomical Therapeutic Chemical Classification System (ATC), dispensing dates, and the total number of tablets dispensed. Participants were categorised with hypertension if they had redeemed prescriptions for at least two classes of antihypertensive drugs (ATC: C02A-D, C02L, C03A-B, C03D-E, C03X, C04, C05, C07, C08, C09) 0 to 180 days before the index MI. Participants were categorised with depression before MI if they had redeemed a prescription for an antidepressant (ATC: N06A) 0 to 180 days before the index MI. Participants were categorised with severe mental disorder if they had redeemed a prescription for antipsychotics (ATC: N05A) 0 to 180 days before the index MI.

Cardiac disease severity was measured by the British Medical Research Council (MRC) dyspnea score, a self-report instrument.<sup>25</sup> A score  $\geq 3$  has been shown to provide a simple and valid method for predicting overall mortality.<sup>26</sup>

### Health behaviour, health care interventions, and socio-demographics

Data on smoking, alcohol use, physical activity, intake of fruit and vegetables, intake of fish, intake of fish oil supplement, height, and weight (body mass index=weight [kg] per height [m<sup>2</sup>]) were self-reported and classified according to the general recommendations from the Danish National Board of Health.<sup>9</sup> To assess physical activity, we asked, "How many days per week are you generally physically active for at least 30 minutes per day? You may include any physical activity at work or in your spare time that makes your pulse rate increase". Response options were from zero days to every day per week. Physical activity was computed as a continuous variable (days/week).

We defined cardiac rehabilitation<sup>27,28</sup> in the questionnaire and asked whether they had participated in hospital-based phase two cardiac rehabilitation. Those who responded "yes,

1  
2 and I took part” were classified as ‘participants’ those who responded “yes, but I didn’t take  
3 part” or “no” were classified as ‘non-participants’.<sup>9</sup>

4  
5 Drug prescription data were obtained from the prescription database.<sup>24</sup> Data on aspirin  
6 (ATC: B01AC06), clopidogrel (ATC: B01AC04), statins (ATC: C10AA),  $\beta$ -blockers (ATC: C07),  
7 ACE-inhibitors/angiotensin 2 receptor blockers (ATC: C09), furosemide (ATC: C03C),  
8 aldosterone antagonists (ATC: C03D), and antidepressants (ATC: N06A) were collected. We  
9 calculated whether the participant had tablets available on the day that we sent the  
10 questionnaire (the number of tablets on the last redeemed prescription before the  
11 questionnaire was sent  $\geq$  the number of days to the questionnaire was sent) and defined the  
12 participant as ‘receiving treatment’ if tablets were available. We defined the participant as  
13 ‘receiving secondary prophylactic medication’ if the participant was receiving treatment with  
14 three or more of the following drugs: aspirin, clopidogrel, statins, and  $\beta$ -blockers. We defined  
15 the participant as ‘receiving heart failure medication’ if the participant was receiving  
16 treatment with furosemide or aldosterone antagonists.

17  
18 Data on age at MI and sex were obtained from the Civil Registration System.<sup>11</sup> Each  
19 participant’s socio-demographic characteristics (cohabitation status, education, labour  
20 market status) from the year before MI (2008) were retrieved from the Danish Integrated  
21 Database for Labour Market Research.<sup>29</sup>

### 22 23 24 25 26 27 28 29 30 31 32 33 34 35 **Cardiovascular events and death**

36 Outcome events were measured as a composite endpoint comprising new cardiovascular  
37 events (MI, heart failure, stroke or transient ischaemic attack) and all-cause mortality.  
38 Information on outcomes was collected from baseline (the day we sent the questionnaire) to  
39 the last day of follow-up (31 July 2012). The Danish National Patient Register<sup>22</sup> provided  
40 information on cardiovascular events. Vital status (dead or alive) was obtained from the Civil  
41 Registration System.<sup>11</sup>

### 42 43 44 45 46 47 48 **Statistical analysis**

49 Neither natural thresholds nor clinically based thresholds are defined for the MCS score, so  
50 we divided the participants into quartiles according to their score (1<sup>st</sup> quartile had the lowest  
51 score; 4<sup>th</sup> quartile had the highest score). This categorisation was done to enhance clinical  
52 interpretability and to evaluate a possible dose response relationship.

53  
54  
55  
56  
57 In order to address the potential risk of selection bias, we used antidepressant  
58 consumption as a proxy for depression and calculated hazard ratios (HRs) for the association  
59  
60



1  
2 between antidepressant consumption and new cardiovascular events or death for both  
3 participants and non-participants.

4  
5 The association between baseline characteristics and MCS score was assessed using  $\chi^2$   
6 statistics for categorical variables and analysis of variance for continuous variables, or  
7 Kruskal-Wallis tests when the conditions for analysis of variance were not fulfilled.  
8

9  
10 We calculated the event-free survival time as the time from three months after the MI  
11 (baseline evaluation of mental health status) to the first cardiovascular event or death. If no  
12 event or death occurred, the participant was censored on 31 July 2012. Two persons  
13 emigrated during the time of follow-up, and they were censored on the day of their  
14 emigration. Owing to the use of nationwide registers, we had complete follow-up of all  
15 participants.  
16  
17  
18  
19

20  
21 The unadjusted association between mental health status and new cardiovascular events  
22 or death was presented graphically with Kaplan-Meier curves. The cumulative incidence three  
23 years after the MI was estimated using the cumulative hazards function, and identical  
24 incidence was tested using the log-rank test.  
25  
26

27  
28 The risk of cardiovascular events or death associated with mental health status was  
29 compared using Cox proportional hazards regression. The covariates for the multivariate  
30 model (age, sex, cohabitation status, education, labour market status, cardiac disease severity,  
31 history of stroke, diabetes mellitus, heart failure, secondary prophylactic medication, smoking  
32 status, physical activity, depression, and anxiety) were chosen on the basis of previous  
33 studies. We evaluated whether the HRs of mental health status following MI varied by  
34 subgroups by testing for interaction using Wald test in an age-adjusted model, and the results  
35 are presented in a forest plot. Too few outcome events were available to test for interaction in  
36 quartiles, so we tested it in a dichotomised (median cut) model. We excluded variables with  
37 less than five events in a subgroup.  
38  
39  
40  
41  
42  
43  
44

45 Finally, we calculated HRs for the association between each of the mental health status  
46 items (continuous; per one-point lower item score) and outcome.  
47

48 No variable had more than 0.3% missing data, except body mass index (for which 2.5%  
49 data were missing) and education (for which 3.3% data were missing), and analyses were  
50 done on complete data only.  $P < 0.05$  was considered statistically significant.  
51  
52  
53  
54  
55  
56  
57  
58  
59  
60

## RESULTS

### Participant characteristics

Among a total of 1,288 eligible patients with first-time MI, 880 (68.3%) completed the SF-12, and the mean MCS score was 44.9 (SD 11.5). Non-participants were more often women, older, had fewer socioeconomic resources, and more comorbid conditions than participants (Web Extra Supplement Table A). The estimates of the association between antidepressant consumption and new cardiovascular events or death in participants, HR 1.55 (95% confidence interval 1.12 to 2.14) and in non-participants, HR 1.46 (1.01 to 2.10), were similar. Compared to participants with higher mental health status, the participants with the lowest mental health status (1st quartile, table 1) were impaired in a range of variables; e.g. symptoms of depression and anxiety, cardiac disease severity, comorbidity, socioeconomic resources, and health behaviour.

### Cumulative incidence

A total of 277 outcomes (230 new cardiovascular events and 47 deaths) occurred during 1,940 person years of follow-up (median 2.6 years, SD 1.0). The Kaplan-Meier curves (figure 1) show that the unadjusted risk of a cardiovascular event or death increased with decreasing mental health status. During three years after the MI, the cumulative incidence of the composite endpoint was 47.5% (95% confidence interval 40.9% to 54.5%) for persons in the first, 37.0% (30.9% to 43.9%) in the second, 29.1% (23.5% to 35.6%) in the third, and 15.0% (10.8% to 20.5%) in the fourth quartile,  $P < 0.001$ .

### Association between mental health status and new cardiovascular events or death

The age-adjusted HRs for new cardiovascular events or death in post-MI patients increased with decreasing mental health status (HR<sub>3rd quartile</sub> 2.09 (95% confidence interval 1.36 to 3.19), HR<sub>2nd quartile</sub> 2.67 (1.77 to 4.03), HR<sub>1st quartile</sub> 3.53 (2.36 to 5.27), table 2). Additional adjustment for cardiac disease severity, physical activity, depression, and anxiety attenuated the association. In the fully adjusted model, the MI patients with the lowest mental health status had a more than two-fold higher risk of new cardiovascular events or death compared to the patients with the highest mental health status (table 2).

We found no statistically significant difference in the HRs between any subgroups of MI patients (figure 2).

### Exploratory analysis of the six mental health status items

Table 3 outlines the association between mental health status item scores and subsequent cardiovascular events or death. The items were entered as continuous variables and the HRs reflect the risk of new cardiovascular events or death per one point lower item score. The largest HRs were seen for the 'Vitality' item, HR 1.24 (95% confidence interval 1.09 to 1.42), the 'Mental Health' item 1, HR 1.19 (1.04 to 1.35), and the 'Role-Emotional' item 1, HR 1.16 (1.04 to 1.29).

## DISCUSSION

In this population-based cohort study, we found that low mental health status after first-time MI predicted an increased risk of new cardiovascular events or death in a dose-response manner. The association was explained partly by cardiac disease severity, physical activity, depression, and anxiety. However, even after adjustments for these variables, patients with the lowest mental health status had a more than two-fold higher risk of new cardiovascular events or death compared to those with the highest mental health status.

### Strengths and limitations of the study

Major strengths of this study are its population-based nature and the homogenous study population; we invited all patients with first-time MI during one year in a well-defined area. Our response rate was reasonably high (68.3%), and information on outcome was collected without loss to follow-up. Non-participants tended to have fewer social resources and more comorbid conditions, and they hence resembled the participants with the lowest mental health status. In order to address the potential risk of selection bias, we used antidepressant consumption as a proxy for depressive symptoms similarly to previous studies.<sup>30</sup> The estimates of the association between antidepressant consumption and new cardiovascular events or death in participants were similar. Thus, bias due to selection of study participants seems to be an unlikely explanation for our findings.

Information on MI was registered prospectively and did not rely on the participants' or the relatives' memory. The MI diagnosis in the Danish National Patient Register was based on the current European Society of Cardiology criteria for MI, coded by the physician in charge of the discharge, and the information is known to have a high sensitivity (90%) and specificity (92%).<sup>10</sup> The specificity was even higher in our study because we confirmed the MI diagnosis by reviewing the discharge summaries,<sup>9</sup> and this reduced the risk of information bias. We also

1  
2 reduced the risk of information bias by using previously translated and validated scales, pilot  
3 testing the questionnaire among MI patients, and using high-quality register data.

4  
5 We used a new algorithm for the calculation of the MCS score from the SF-12 version 2  
6 using weights constructed by oblique confirmatory factor analysis, which allows the physical  
7 and mental component summary score to be correlated. Fleishman et al developed this new  
8 scoring algorithm<sup>15</sup> due to controversy regarding the traditional scoring algorithm.<sup>31-33</sup> The  
9 traditional scoring algorithm forces mental and physical health to be uncorrelated.  
10 Consequently, when physical scores are well below the mean and mental scores somewhat  
11 less below the mean, as is often the case in patients with physical illness, this scoring method  
12 will result in an artifactual migration of the MCS score towards the mean.<sup>31</sup> In sub-analyses,  
13 we estimated HRs based on traditionally computed MCS scores (Web Extra Supplement Table  
14 B). As expected, they were smaller compared to the HRs based on MCS scores computed with  
15 the new scoring algorithm. We evaluated mental health status three months after MI, allowing  
16 mental health to reach a more stable level after this major life event.

17  
18 A diagnosis of depression or anxiety should ideally be based on a diagnostic interview.  
19 Since a previous study has estimated the sensitivity of the HADS-D $\geq$ 8 for identification of  
20 depression to be 65% in MI patients,<sup>19</sup> a substantial number of participants with depression  
21 may have been misclassified as not having depression. However, we identified 18.3% with  
22 depression in our population (HADS-D $\geq$ 8), which is in keeping with the prevalence of post-MI  
23 depression identified by structured clinical interviews in other studies (19.8%).<sup>1</sup> We found no  
24 studies reporting on the sensitivity and specificity of the HADS-A in an MI population.  
25 However, among acute coronary syndrome patients, a HADS-A $\geq$ 8 had a sensitivity of 91%.<sup>21</sup>  
26 Accordingly, we most likely identified the majority of patients with anxiety. In a sensitivity  
27 analysis, we excluded patients with depression or anxiety (HADS-A/D $\geq$ 8), and this did not  
28 weaken the estimates (Web Extra Supplement Table C).

29  
30 Schizophrenia and bipolar disorder are known to be associated with a higher risk of  
31 mortality, and part of this excess risk is attributable to cardiovascular diseases.<sup>34</sup> We used a  
32 prescription of antipsychotics, between MI and 180 days before, as an approximation of  
33 severe mental disorder. Thirteen participants had redeemed such a prescription. To examine  
34 how much of the association could be explained by these patients, we excluded this group in a  
35 sensitivity analysis (not shown), and this did not weaken the estimates.

36  
37 Lifestyle behaviour was self-reported, and participants with low mental health status may  
38 have been more likely underreport adverse lifestyle, including physical inactivity. However,  
39 participants with low mental health status did in fact report adverse lifestyle in our study, and  
40  
41  
42  
43  
44  
45  
46  
47  
48  
49  
50  
51  
52  
53  
54  
55  
56  
57  
58  
59  
60

1  
2 a study on depression<sup>35</sup> found no differences when substituting self-reported physical activity  
3 with an objective measure of physical fitness.  
4

5 Information on a range of participant characteristics and the large sample size allowed us  
6 to take into account several potential confounders, such as socio-demographic characteristics,  
7 cardiac disease severity, comorbidity, and behavioural factors. In sub-analyses, we adjusted  
8 for other potential confounders (body mass index, hypertension, history of depression,  
9 antidepressant use, intake of alcohol, fish, and fruit, and participation in phase two cardiac  
10 rehabilitation), but this did not change the estimates ( $\leq 4\%$ ). However, we cannot rule out the  
11 possibility of residual confounding.  
12  
13  
14  
15  
16  
17

### 18 19 **Comparison with other studies**

20 Four previous studies<sup>5-8</sup> have investigated the association between mental health status after  
21 MI and prognosis independent of various clinical risk factors, such as disease severity. They  
22 used different measures of mental health status (COOP charts,<sup>6</sup> Quality of Life after MI  
23 questionnaire,<sup>8</sup> the World Health Organization Quality of Life Instrument Abbreviated,<sup>7</sup> and  
24 SF-12<sup>5</sup>), and they all found an independent association between low mental health status and  
25 higher risk of adverse outcomes. Compared with our study, these studies were conducted in  
26 modest-sized cohorts (n=112,<sup>6</sup> 375,<sup>8</sup> 145<sup>7</sup>), had short follow-up (four to five months,<sup>6</sup> 18  
27 months<sup>8</sup>), mental health status was assessed up to five years or more after MI,<sup>5,7</sup> included  
28 only women<sup>7</sup> or patients who had an ejection fraction  $<30\%$ .<sup>5</sup> Most importantly, none of  
29 these four MI studies took into account important mediators such as depression, anxiety, and  
30 potential behavioural mediators such as physical activity.  
31  
32  
33  
34  
35  
36  
37  
38

39 Our study is the first to explore the association between mental health status after MI and  
40 new cardiovascular events or death in subgroups, and we identified no factors that modified  
41 the risk. However, the sample size was low in some of the subgroups.  
42  
43  
44

45 Our study is also the first to explore the association between mental health status and  
46 cardiovascular events or death on an item level. We found that the 'Vitality' item, the 'Role-  
47 Emotional' item 1, and the 'Mental Health' item 1 were significantly associated with adverse  
48 events after adjustments for clinical, socio-demographic, behavioural, and other psychological  
49 risk factors, whereas the remaining items were not. Our results indicate that these items are  
50 the most important for the association between mental health status (MCS score) and adverse  
51 events. Yet, it is important to keep in mind that the items have different weights and that the  
52 physical items are also included when computing the MCS score.<sup>12,15</sup>  
53  
54  
55  
56  
57  
58  
59  
60

### Implications for clinicians

In addition to psychological, social, and functional impairment, clinicians should be aware that low mental health status following MI is associated with an increased risk of new cardiovascular events and death. Our results underline the importance of always considering and prioritising mental health issues in post-MI patients. In this study, we identified low mental health status after MI to be a significant risk factor for poor prognosis, independent of clinical, socio-demographic, behavioural, and other psychological risk factors. In other words, mental health status has incremental value in the identification of patients at elevated risk for adverse outcome. Adding mental health status measurement to our present risk factor armamentarium could help clinicians to distinguish between groups of patients with a very low versus a very high risk of adverse outcome, and thereby help identify vulnerable patients in need of optimised care. However, we do not know whether measurement of mental health status and improved knowledge of prognosis will translate into better outcomes for our patients. This is an important focus for future research in this field.

### Possible explanations and future research

This study suggests that mental health status may capture prognostic aspects of mental health which are not captured by measures of depression and anxiety. Further research is needed to clarify more specifically what aspects of mental health that are at play.

The underlying explanation for the association between mental health status after MI and new cardiovascular events or death remains unclear. Our study evaluated cardiac disease severity, behavioural factors, and treatment strategies concurrently with mental health status. We therefore cannot determine whether these factors were the cause or the result of the mental health status. We were unable to assess whether the association was explained by biological mechanisms (such as heart rate variability, platelet function, or inflammatory mechanisms) since we had no information on these biological variables. Future studies should incorporate such biological variables.<sup>36</sup>

Further research is also needed to identify interventions that could improve both mental health status and prognosis in MI patients. Murphy et al<sup>37</sup> examined the effectiveness of a complex intervention designed to improve outcomes, including mental health status (measured with SF-12) for patients with coronary heart disease in a cluster randomised controlled trial. The intervention was “tailored care plans for practices (practice based training in prescribing and behaviour change, administrative support, quarterly newsletter), and tailored care plans for patients (motivational interviewing, goal identification, and target

1  
2 setting for lifestyle change).<sup>37</sup> They found that admissions to hospital were significantly  
3 reduced after an intensive 18-month intervention to improve outcomes for patients with  
4 coronary heart disease, but there was no change in mental health status. It was not stated how  
5 they computed the MCS score, but they probably used the traditional scoring algorithm as the  
6 study were conducted prior to Fleishman's publication.<sup>15</sup> Hence, artifactual migration of the  
7 MCS score towards the mean in these physically ill participants may at least in part explain  
8 the lack of association.  
9  
10  
11  
12  
13

## 14 15 16 **Conclusion**

17 We found that low mental health status following MI was associated with an increased risk of  
18 new cardiovascular events or death. The association was explained partly by cardiac disease  
19 severity, physical activity, depression, and anxiety, but low mental health status remained an  
20 independent prognostic risk factor. Further research is needed to disentangle the pathways  
21 that link mental health status following MI to prognosis and, in continuation hereof, to  
22 identify interventions that can improve both mental health status and prognosis.  
23  
24  
25  
26  
27  
28  
29  
30  
31  
32

33 Contributorship: TJN, and KKL, MV, BC, KSC conceived the study idea and designed the study. KKL collected the data.  
34 TJN, and KKL, MV, BC, KSC reviewed the literature. TJN, and KKL, MV, BC, KSC directed the analyses, which were  
35 carried out by TJN. All authors participated in the discussion and interpretation of the results. TJN organised the writing  
36 and wrote the initial drafts. All authors critically revised the manuscript for intellectual content and approved the final  
37 version. TJN is the guarantor.

38 Funding: The study was supported by the Danish Independent Research Council (grant 12-126032), the Tryg  
39 Foundation (grant number 7844-07), the Danish Health Insurance Foundation (grant number 2010B013) and the  
40 Lundbeck Foundation. None of the funding sources had a role in the design, conduct, analysis, or reporting of the study.

41 Competing interests: All authors have completed the ICMJE uniform disclosure form at [www.icmje.org/coi\\_disclosure.pdf](http://www.icmje.org/coi_disclosure.pdf)  
42 and declare: TJN had financial support from the Danish Independent Research Council for the submitted work; no  
43 financial relationships with any organisations that might have an interest in the submitted work in the previous three  
44 years; no other relationships or activities that could appear to have influenced the submitted work.

45 Ethical approval: Not needed.

46 Data sharing: No additional data available.

47  
48 The Corresponding Author has the right to grant on behalf of all authors and does grant on behalf of all authors, a  
49 worldwide licence to the Publishers and its licensees in perpetuity, in all forms, formats and media (whether known now  
50 or created in the future), to i) publish, reproduce, distribute, display and store the Contribution, ii) translate the  
51 Contribution into other languages, create adaptations, reprints, include within collections and create summaries, extracts  
52 and/or, abstracts of the Contribution, iii) create any other derivative work(s) based on the Contribution, iv) to exploit all  
53 subsidiary rights in the Contribution, v) the inclusion of electronic links from the Contribution to third party material where-  
54 ever it may be located; and, vi) licence any third party to do any or all of the above.  
55  
56  
57  
58  
59  
60

Table 1 | Baseline characteristics of 880 patients with first-time myocardial infarction in 2009 by quartiles<sup>a</sup> of mental health status (Mental Component Summary score from the Short-Form 12 version 2)

| Variable <sup>b</sup>                                        | Baseline MCS Score                |                                   |                                   |                                   | P Value |
|--------------------------------------------------------------|-----------------------------------|-----------------------------------|-----------------------------------|-----------------------------------|---------|
|                                                              | 1 <sup>st</sup> Quartile<br>n=220 | 2 <sup>nd</sup> Quartile<br>n=220 | 3 <sup>rd</sup> Quartile<br>n=220 | 4 <sup>th</sup> Quartile<br>n=220 |         |
| Self-reported health <sup>e</sup>                            |                                   |                                   |                                   |                                   |         |
| Mental health status (MCS score) <sup>c</sup> , mean (range) | 28.8<br>(11.1-37.2)               | 42.2<br>(37.2-47.0)               | 51.0<br>(47.0-54.5)               | 57.7<br>(54.5-60.8)               | <.001   |
| HADS-A/D ≥8, No. (%)                                         | 152 (69.7)                        | 79 (36.07)                        | 22 (10.0)                         | 2 (0.91)                          | <.001   |
| Socio-demographic characteristics                            |                                   |                                   |                                   |                                   |         |
| Age, y, mean (SD)                                            | 68.9 (12.4)                       | 68.4 (12.3)                       | 65.6 (11.2)                       | 64.5 (10.0)                       | <.001   |
| Male sex, No. (%)                                            | 120 (54.6)                        | 138 (62.7)                        | 177 (80.5)                        | 173 (78.6)                        | <.001   |
| Cohabitation status, living alone, No. (%) <sup>d</sup>      | 94 (42.7)                         | 82 (37.3)                         | 55 (25.0)                         | 47 (21.4)                         | <.001   |
| Education, No. (%) <sup>d</sup>                              |                                   |                                   |                                   |                                   |         |
| <10 years                                                    | 114 (53.3)                        | 105 (50.2)                        | 85 (39.7)                         | 76 (35.5)                         |         |
| 10-12 years                                                  | 76 (35.5)                         | 81 (38.8)                         | 99 (46.3)                         | 101 (47.2)                        |         |
| >12 years                                                    | 24 (11.2)                         | 23 (11.0)                         | 30 (14.0)                         | 37 (17.3)                         | .004    |
| Labour market status, No. (%) <sup>d</sup>                   |                                   |                                   |                                   |                                   |         |
| Working                                                      | 50 (22.7)                         | 70 (31.8)                         | 99 (45.0)                         | 103 (46.8)                        |         |
| Pension                                                      | 136 (61.8)                        | 123 (55.9)                        | 105 (47.7)                        | 107 (48.6)                        |         |
| Out of the work force                                        | 34 (15.5)                         | 27 (12.3)                         | 16 (7.3)                          | 10 (4.6)                          | <.001   |
| Health status <sup>e</sup>                                   |                                   |                                   |                                   |                                   |         |
| Body mass index, mean (SD)                                   | 26.5 (5.1)                        | 26.3 (4.8)                        | 26.8 (4.5)                        | 26.9 (4.5)                        | .626    |
| Comorbid conditions, No. (%) <sup>f</sup>                    |                                   |                                   |                                   |                                   |         |
| Hypertension <sup>g</sup>                                    | 88 (40.0)                         | 75 (34.1)                         | 54 (24.6)                         | 54 (24.6)                         | <.001   |
| Stroke                                                       | 21 (9.6)                          | 16 (7.3)                          | 7 (3.2)                           | 5 (2.3)                           | .002    |
| TCl                                                          | 12 (5.5)                          | 3 (1.4)                           | 3 (1.4)                           | 10 (4.6)                          | .021    |
| Revascularization                                            | 37 (16.8)                         | 16 (7.3)                          | 12 (5.5)                          | 15 (6.8)                          | <.001   |
| Heart failure                                                | 16 (7.3)                          | 4 (1.8)                           | 4 (1.8)                           | 4 (1.8)                           | <.001   |
| Diabetes mellitus                                            | 51 (23.2)                         | 38 (17.3)                         | 24 (10.9)                         | 21 (9.6)                          | <.001   |
| Depression <sup>h</sup>                                      | 44 (20.0)                         | 21 (9.6)                          | 11 (5.0)                          | 9 (4.1)                           | <.001   |
| Cardiac disease severity <sup>e</sup>                        |                                   |                                   |                                   |                                   |         |
| MRC dyspnea score ≥3, No. (%)                                | 110 (50.2)                        | 45 (20.5)                         | 21 (9.6)                          | 3 (1.4)                           | <.001   |



|                                                                |            |            |            |            |       |
|----------------------------------------------------------------|------------|------------|------------|------------|-------|
| Medication use, No. (%) <sup>e</sup>                           |            |            |            |            |       |
| Aspirin                                                        | 166 (75.5) | 168 (76.4) | 173 (78.6) | 186 (84.6) | .086  |
| Clopidogrel                                                    | 159 (72.3) | 164 (74.6) | 173 (78.6) | 184 (83.6) | .025  |
| β-blocker                                                      | 174 (79.1) | 181 (82.3) | 178 (80.9) | 180 (81.8) | .837  |
| Statin                                                         | 169 (76.8) | 184 (83.6) | 190 (86.4) | 195 (88.6) | .005  |
| ACE-inhibitors/AT-II-receptor block                            | 111 (50.5) | 111 (50.5) | 107 (48.6) | 100 (45.5) | .689  |
| Furosemide/Aldosterone antagonist                              | 93 (42.3)  | 64 (29.1)  | 35 (15.9)  | 27 (12.3)  | <.001 |
| Antidepressants                                                | 53 (24.1)  | 24 (10.9)  | 9 (4.1)    | 8 (3.6)    | <.001 |
| Secondary prophylactic medication                              | 146 (66.4) | 160 (72.7) | 162 (73.6) | 166 (75.5) | .163  |
| Potential behavioural mediators <sup>e</sup>                   |            |            |            |            |       |
| Alcohol consumption >14/21 units/wk, No. (%)                   | 8 (3.6)    | 12 (5.5)   | 8 (3.6)    | 14 (6.4)   | .438  |
| Smoking status, No. (%)                                        |            |            |            |            |       |
| Current                                                        | 54 (24.8)  | 49 (22.4)  | 44 (20.0)  | 30 (13.6)  |       |
| Past                                                           | 124 (56.9) | 122 (55.7) | 121 (55.0) | 128 (58.2) |       |
| Never                                                          | 40 (18.4)  | 48 (21.9)  | 55 (25.0)  | 62 (28.2)  | .048  |
| Intake of fruit and vegetables ≥3 portions/d, No. (%)          | 69 (31.4)  | 75 (34.1)  | 86 (39.1)  | 100 (45.5) | .013  |
| Intake of fish ≥3 times/d, No. (%)                             | 61 (27.7)  | 78 (35.5)  | 93 (42.5)  | 96 (43.8)  | .001  |
| Intake of fish oil supplement, No. (%)                         | 57 (25.9)  | 50 (22.7)  | 75 (34.1)  | 69 (31.4)  | .035  |
| Physical activity, d/wk, mean (SD)                             | 3.6 (2.8)  | 5.1 (2.3)  | 5.3 (2.1)  | 5.7 (1.8)  | <.001 |
| Participation in phase two cardiac rehabilitation <sup>e</sup> | 110 (50.2) | 119 (54.1) | 144 (65.5) | 142 (64.8) | .001  |

Abbreviations: MRC, Medical Research Council; ACE, angiotensin converting enzyme; AT, angiotensin; HADS-A/D, Hospital Anxiety and Depression Scale-Anxiety/Depression; MCS, Mental Component Summary.

<sup>a</sup>1st quartile had the lowest MCS score; 4<sup>th</sup> quartile had the highest MCS score.

<sup>b</sup>Totals may not sum to their respective totals due to missing data. No variable had more than 3.3% missing data.

<sup>c</sup>Norm-based scoring (1998 U.S. population) using weights derived from confirmatory factor analysis.

<sup>d</sup>Information collected the year before MI (in 2008). <sup>e</sup>Information collected three months after MI. <sup>f</sup>Information collected at the time of MI.

<sup>g</sup>Redeemed prescription for at least two classes of antihypertensive drugs between MI and 180 days before.

<sup>h</sup>Redeemed prescription for antidepressants between MI and 180 days before.

Figure 1 | Kaplan-Meier curves by quartiles of mental health status (Mental Component Summary score from the Short-Form 12 version 2)

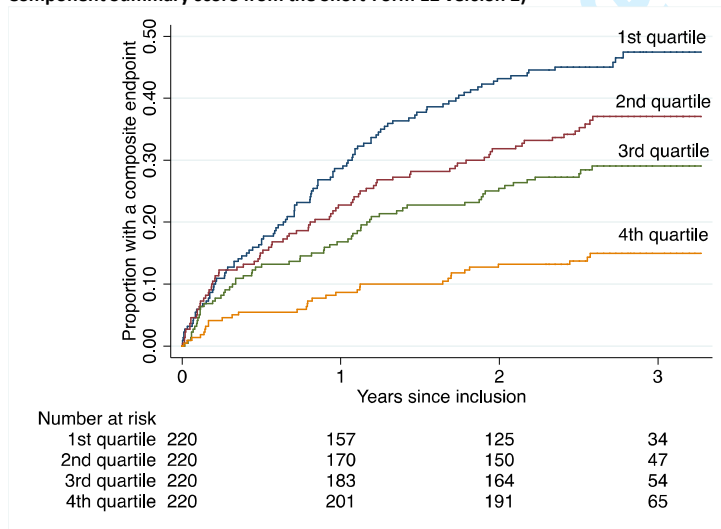

Table 2 | Association between mental health status (Mental Component Summary score from the Short-Form 12 version 2) and subsequent cardiovascular events or death, with sequential adjustment for potential confounders

| Adjusted variables <sup>a</sup>                | Hazard ratio (95% confidence interval)              |                                                    |                                                    |                                                    |
|------------------------------------------------|-----------------------------------------------------|----------------------------------------------------|----------------------------------------------------|----------------------------------------------------|
|                                                | 1 <sup>st</sup> Quartile MCS (102/220) <sup>b</sup> | 2 <sup>nd</sup> Quartile MCS (80/220) <sup>b</sup> | 3 <sup>rd</sup> Quartile MCS (63/220) <sup>b</sup> | 4 <sup>th</sup> Quartile MCS (32/220) <sup>b</sup> |
| Age                                            | 3.53 (2.36 to 5.27)                                 | 2.67 (1.77 to 4.03)                                | 2.09 (1.36 to 3.19)                                | 1 (reference)                                      |
| Socio-demographic characteristics <sup>c</sup> | 3.56 (2.35 to 5.38)                                 | 2.57 (1.69 to 3.92)                                | 2.06 (1.34 to 3.16)                                | 1 (reference)                                      |
| MRC dyspnea score ≥3                           | 2.74 (1.76 to 4.26)                                 | 2.30 (1.50 to 3.53)                                | 1.96 (1.27 to 3.00)                                | 1 (reference)                                      |
| Comorbidity <sup>d</sup>                       | 2.65 (1.70 to 4.13)                                 | 2.29 (1.50 to 3.51)                                | 1.99 (1.29 to 3.05)                                | 1 (reference)                                      |
| Secondary prophylactic medication              | 2.77 (1.78 to 4.31)                                 | 2.32 (1.51 to 3.56)                                | 1.95 (1.27 to 2.99)                                | 1 (reference)                                      |
| Smoking status                                 | 2.76 (1.76 to 4.31)                                 | 2.31 (1.51 to 3.56)                                | 1.96 (1.27 to 3.01)                                | 1 (reference)                                      |

|                         |                     |                     |                     |               |
|-------------------------|---------------------|---------------------|---------------------|---------------|
| Physical activity       | 2.47 (1.56 to 3.91) | 2.25 (1.47 to 3.46) | 1.89 (1.23 to 2.91) | 1 (reference) |
| HADS-A/D score $\geq 8$ | 2.26 (1.37 to 3.73) | 2.15 (1.38 to 3.35) | 1.87 (1.21 to 2.88) | 1 (reference) |

Abbreviations: MCS, Mental Component Summary; HADS-A/D, Hospital Anxiety and Depression Scale-Anxiety/Depression; MRC, Medical Research Council.

<sup>a</sup> Each model includes the variables from the preceding row so that the final model includes all the variables listed in this table.

<sup>b</sup> No. of outcomes/no. of persons in quartile.

<sup>c</sup> Sex, cohabitation status, education, labour market status. <sup>d</sup> History of stroke, diabetes mellitus, or heart failure.

**Table 3 | Association between mental health status item scores (continuous; per one point lower item score) and subsequent cardiovascular events or death, with sequential adjustment for potential confounders and mediators**

| Adjusted variables <sup>a</sup>                | Hazard ratio (95% confidence interval) |                     |                     |                     |                     |                     |
|------------------------------------------------|----------------------------------------|---------------------|---------------------|---------------------|---------------------|---------------------|
|                                                | Vitality                               | Role-Emotional 1    | Role-Emotional 2    | Social Functioning  | Mental Health 1     | Mental Health 2     |
| Age                                            | 1.41 (1.27 to 1.56)                    | 1.29 (1.18 to 1.41) | 1.26 (1.15 to 1.37) | 1.23 (1.12 to 1.35) | 1.31 (1.18 to 1.46) | 1.21 (1.09 to 1.35) |
| Socio-demographic characteristics <sup>b</sup> | 1.41 (1.26 to 1.57)                    | 1.31 (1.19 to 1.43) | 1.28 (1.17 to 1.41) | 1.21 (1.10 to 1.34) | 1.33 (1.19 to 1.48) | 1.21 (1.08 to 1.36) |
| MRC dyspnea score $\geq 3$                     | 1.30 (1.16 to 1.47)                    | 1.21 (1.10 to 1.34) | 1.18 (1.07 to 1.31) | 1.12 (1.01 to 1.24) | 1.24 (1.11 to 1.40) | 1.11 (0.98 to 1.25) |
| Comorbidity <sup>c</sup>                       | 1.28 (1.14 to 1.44)                    | 1.21 (1.09 to 1.33) | 1.16 (1.05 to 1.28) | 1.10 (0.99 to 1.22) | 1.25 (1.11 to 1.40) | 1.11 (0.98 to 1.25) |
| Secondary prophylactic medication              | 1.31 (1.17 to 1.48)                    | 1.22 (1.11 to 1.35) | 1.18 (1.07 to 1.31) | 1.12 (1.01 to 1.24) | 1.24 (1.11 to 1.40) | 1.11 (0.98 to 1.25) |
| Smoking status                                 | 1.31 (1.17 to 1.48)                    | 1.22 (1.10 to 1.34) | 1.18 (1.06 to 1.30) | 1.12 (1.00 to 1.24) | 1.25 (1.11 to 1.41) | 1.11 (0.98 to 1.25) |
| Physical activity                              | 1.27 (1.13 to 1.44)                    | 1.18 (1.07 to 1.31) | 1.14 (1.03 to 1.27) | 1.08 (0.97 to 1.21) | 1.22 (1.09 to 1.38) | 1.07 (0.95 to 1.21) |
| HADS-A/D score $\geq 8$                        | 1.24 (1.09 to 1.42)                    | 1.16 (1.04 to 1.29) | 1.11 (0.99 to 1.24) | 1.03 (0.91 to 1.16) | 1.19 (1.04 to 1.35) | 1.00 (0.87 to 1.16) |

Abbreviations: HADS-A/D, Hospital Anxiety and Depression Scale-Anxiety/Depression. MRC, Medical Research Council.

<sup>a</sup> Each model includes the variables from the preceding row so that the final model includes all the variables listed in this table.

<sup>b</sup> Sex, cohabitation status, education, labour market status. <sup>c</sup> History of stroke, diabetes mellitus, or heart failure.

**Figure 2 | Association between baseline mental health status (median cut) and subsequent cardiovascular events or death for patients with myocardial infarction and specific characteristics**

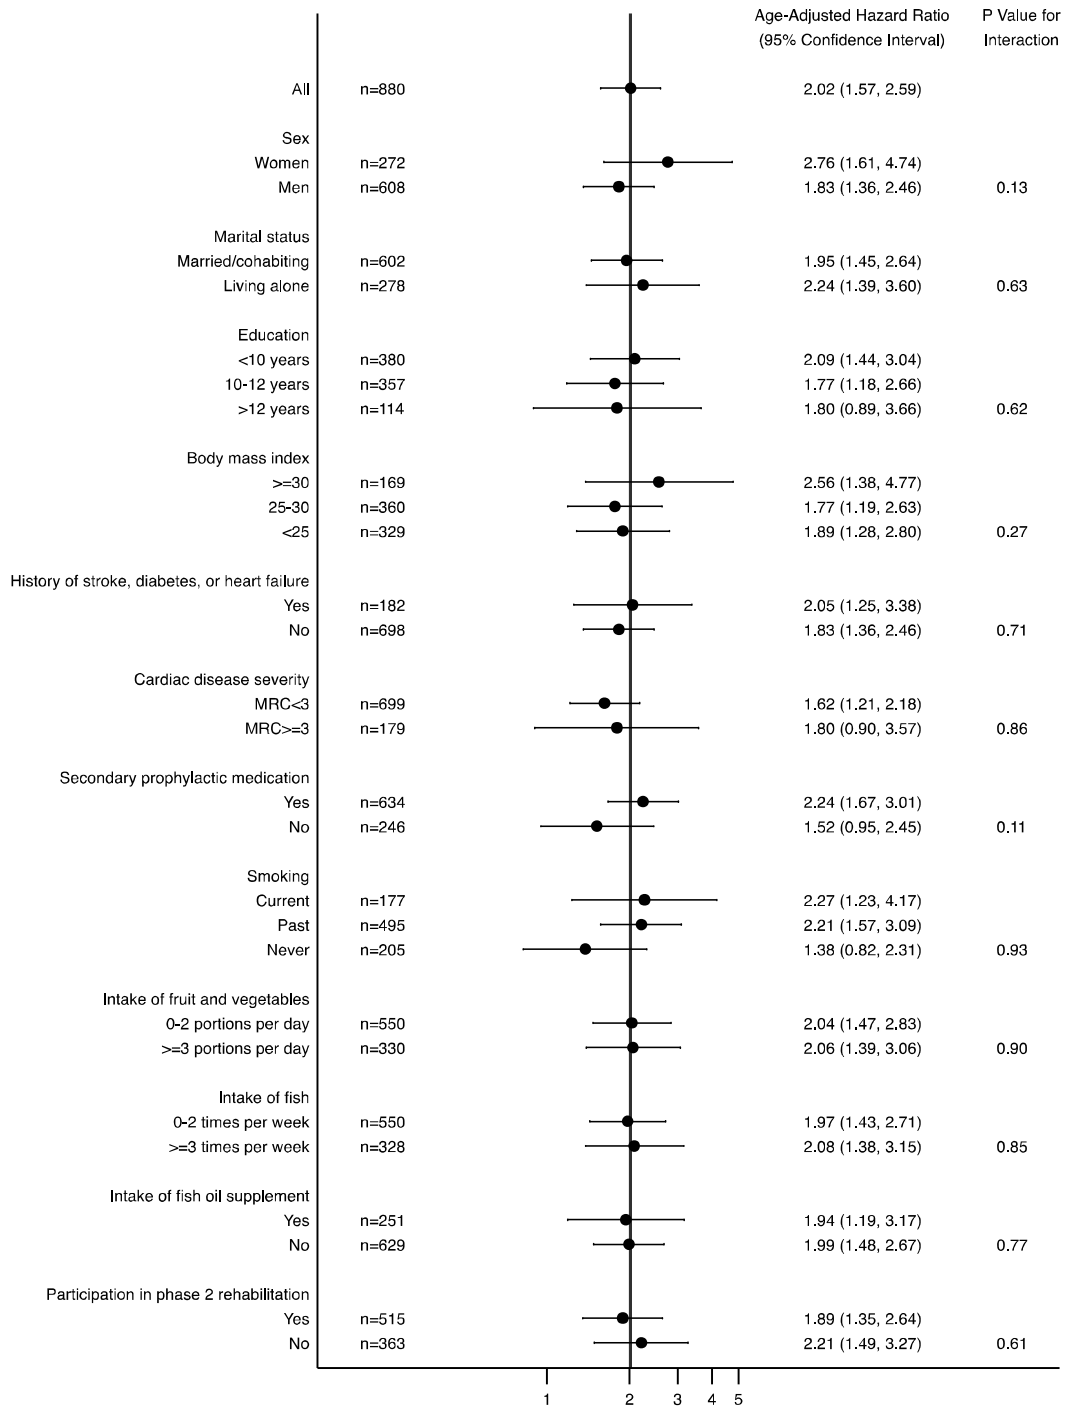

WEB EXTRA SUPPLEMENT

Table A | Comparison of participants and non-participants

| Variable                                                | Participants<br>(n=880) | Non-participants<br>(n=408) | P<br>Value |
|---------------------------------------------------------|-------------------------|-----------------------------|------------|
| Socio-demographic characteristics                       |                         |                             |            |
| Age, y, mean (SD)                                       | 66.8 (11.7)             | 72.1 (14.7)                 | <.001      |
| Male sex, No. (%)                                       | 608 (69.1)              | 226 (55.4)                  | <.001      |
| Cohabitation status, living alone, No. (%) <sup>a</sup> | 278 (31.6)              | 230 (56.4)                  | <.001      |
| Education, No. (%) <sup>a</sup>                         |                         |                             |            |
| <10 years                                               | 380 (44.7)              | 206 (58.2)                  |            |
| 10-12 years                                             | 357 (42.0)              | 112 (31.6)                  |            |
| >12 years                                               | 114 (13.4)              | 36 (10.2)                   | <.001      |
| Labour market status, No. (%) <sup>a</sup>              |                         |                             |            |
| Working                                                 | 322 (36.6)              | 75 (18.4)                   |            |
| Pension                                                 | 471 (53.5)              | 283 (69.4)                  |            |
| Out of the work force                                   | 87 (9.9)                | 50 (12.3)                   | <.001      |
| Comorbid conditions, No. (%) <sup>b</sup>               |                         |                             |            |
| Stroke                                                  | 49 (5.6)                | 45 (11.0)                   | <.001      |
| Revascularization                                       | 80 (9.1)                | 35 (8.6)                    | .764       |
| Congestive heart failure                                | 28 (3.2)                | 45 (11.0)                   | <.001      |
| Diabetes mellitus                                       | 134 (15.2)              | 101 (24.8)                  | <.001      |
| Depression <sup>c</sup>                                 | 85 (9.7)                | 93 (22.8)                   | <.001      |

<sup>a</sup>Information collected the year before MI (in 2008).<sup>b</sup>Information collected at the time of MI.

Table B | Association between mental health status (Mental Component Summary score from the Short-Form 12 version 2; traditional scoring method) and subsequent cardiovascular events or death, with sequential adjustment for potential confounders

| Adjusted variables <sup>a</sup>                | Hazard ratio (95% confidence interval)                |                                                       |                                                       |                                                       |
|------------------------------------------------|-------------------------------------------------------|-------------------------------------------------------|-------------------------------------------------------|-------------------------------------------------------|
|                                                | 1 <sup>st</sup> quartile MCS<br>(96/220) <sup>b</sup> | 2 <sup>nd</sup> quartile MCS<br>(70/220) <sup>b</sup> | 3 <sup>rd</sup> quartile MCS<br>(64/225) <sup>b</sup> | 4 <sup>th</sup> quartile MCS<br>(47/215) <sup>b</sup> |
| Age                                            | 2.40 (1.69 to 3.40)                                   | 1.60 (1.10 to 2.31)                                   | 1.40 (0.96 to 2.04)                                   | 1 (reference)                                         |
| Socio-demographic characteristics <sup>c</sup> | 2.50 (1.74 to 3.61)                                   | 1.62 (1.10 to 2.37)                                   | 1.43 (0.97 to 2.11)                                   | 1 (reference)                                         |
| MRC dyspnea score $\geq 3$                     | 1.94 (1.32 to 2.85)                                   | 1.49 (1.01 to 2.19)                                   | 1.33 (0.90 to 1.97)                                   | 1 (reference)                                         |
| Comorbidity <sup>d</sup>                       | 1.92 (1.30 to 2.83)                                   | 1.52 (1.03 to 2.23)                                   | 1.40 (0.95 to 2.07)                                   | 1 (reference)                                         |
| Secondary prophylactic medication              | 1.94 (1.32 to 2.86)                                   | 1.49 (1.01 to 2.19)                                   | 1.34 (0.91 to 1.98)                                   | 1 (reference)                                         |
| Smoking status                                 | 1.93 (1.31 to 2.84)                                   | 1.45 (0.99 to 2.14)                                   | 1.34 (0.90 to 1.98)                                   | 1 (reference)                                         |
| Physical activity                              | 1.76 (1.19 to 2.62)                                   | 1.41 (0.96 to 2.08)                                   | 1.32 (0.89 to 1.95)                                   | 1 (reference)                                         |
| HADS-A/D score $\geq 8$                        | 1.57 (1.01 to 2.45)                                   | 1.33 (0.89 to 1.99)                                   | 1.30 (0.88 to 1.93)                                   | 1 (reference)                                         |

Abbreviations: MCS, Mental Component Summary; HADS-A/D, Hospital Anxiety and Depression Scale-Anxiety/Depression. MRC, Medical Research Council.

<sup>a</sup> Each model includes the variables from the preceding row so that the final model includes all the variables listed in this table.<sup>b</sup> No. of outcomes/no. of persons in quartile.<sup>c</sup> Sex, cohabitation status, education, labour market status. <sup>d</sup> History of stroke, diabetes mellitus, or heart failure.

Table C | Stratified analysis for those without depression and anxiety, n=622. Association between mental health status (Mental Component Summary score from the Short-Form 12 version 2) and subsequent cardiovascular events or death, with sequential adjustment for potential confounders and mediators

| Adjusted variables <sup>a</sup>                | Hazard ratio (95% confidence interval)                |                                                       |                                                       |                                                       |
|------------------------------------------------|-------------------------------------------------------|-------------------------------------------------------|-------------------------------------------------------|-------------------------------------------------------|
|                                                | 1 <sup>st</sup> quartile MCS<br>(63/155) <sup>b</sup> | 2 <sup>nd</sup> quartile MCS<br>(48/156) <sup>b</sup> | 3 <sup>rd</sup> quartile MCS<br>(38/154) <sup>b</sup> | 4 <sup>th</sup> quartile MCS<br>(19/157) <sup>b</sup> |
| Age                                            | 3.39 (2.01 to 5.73)                                   | 2.63 (1.55 to 4.49)                                   | 2.20 (1.27 to 3.81)                                   | 1 (reference)                                         |
| Socio-demographic characteristics <sup>c</sup> | 3.49 (2.04 to 5.98)                                   | 2.59 (1.51 to 4.44)                                   | 2.05 (1.17 to 3.56)                                   | 1 (reference)                                         |
| MRC dyspnea score $\geq 3$                     | 3.15 (1.81 to 5.48)                                   | 2.45 (1.42 to 4.22)                                   | 2.00 (1.15 to 3.48)                                   | 1 (reference)                                         |
| Comorbidity <sup>d</sup>                       | 3.03 (1.74 to 5.29)                                   | 2.44 (1.42 to 4.19)                                   | 1.91 (1.10 to 3.34)                                   | 1 (reference)                                         |
| Secondary prophylactic medication              | 3.22 (1.85 to 5.59)                                   | 2.44 (1.42 to 4.20)                                   | 2.02 (1.16 to 3.52)                                   | 1 (reference)                                         |
| Smoking status                                 | 3.13 (1.79 to 5.46)                                   | 2.52 (1.46 to 4.33)                                   | 1.99 (1.14 to 3.46)                                   | 1 (reference)                                         |
| Physical activity                              | 3.03 (1.72 to 5.34)                                   | 2.49 (1.44 to 4.29)                                   | 1.97 (1.13 to 3.43)                                   | 1 (reference)                                         |

Abbreviations: MCS, Mental Component Summary; MRC, Medical Research Council.

<sup>a</sup> Each model includes the variables from the preceding row so that the final model includes all the variables listed in this table.<sup>b</sup> No. of outcomes/no. of persons in quartile.<sup>c</sup> Sex, cohabitation status, education, labour market status. <sup>d</sup> History of stroke, diabetes mellitus, or heart failure.

eFigure 1 | The 6 mental health status items from the Short-Form 12 version 2

4. During the past 4 weeks, how much of the time have you had any of the following problems with your work or other regular daily activities as a result of any emotional problems (such as feeling depressed or anxious)?

- a. Accomplished less than you would like.
- b. Did work or other activities less carefully than usual.

6. These questions are about how you feel and how things have been with you during the past 4 weeks. For each question, please give the one answer that comes closest to the way you have been feeling. How much of the time during the past 4 weeks...

- a. Have you felt calm and peaceful?
- b. Did you have a lot of energy?
- c. Have you felt downhearted and depressed?

7. During the past 4 weeks, how much of the time has your physical health or emotional problems interfered with your social activities (like visiting friends, relatives, etc.)?

The options for all of the items are:

All of the time, most of the time, some of the time, a little of the time, none of the time.

*4a: Role-Emotional item 1.*

*4b: Role-Emotional item 2.*

*6a: Mental Health item 1.*

*6b: Vitality.*

*6c: Mental Health item 2.*

*7: Social Functioning.*

- 1  
2  
3  
4  
5  
6  
7  
8  
9  
10  
11  
12  
13  
14  
15  
16  
17  
18  
19  
20  
21  
22  
23  
24  
25  
26  
27  
28  
29  
30  
31  
32  
33  
34  
35  
36  
37  
38  
39  
40  
41  
42  
43  
44  
45  
46  
47  
48  
49  
50  
51  
52  
53  
54  
55  
56  
57  
58  
59  
60
1. Thombs BD, Bass EB, Ford DE, Stewart KJ, Tsilidis KK, Patel U, et al. Prevalence of depression in survivors of acute myocardial infarction - Review of the evidence. *Journal of General Internal Medicine* 2006; JAN 2006;21(1).
2. Roest AM, Martens EJ, Denollet J, de Jonge P. Prognostic Association of Anxiety Post Myocardial Infarction With Mortality and New Cardiac Events: A Meta-Analysis. *Psychosom Med* 2010; JUL-AUG 2010;72(6).
3. Crilley JG, Farrer M. Impact of first myocardial infarction on self-perceived health status. *QJM* 2001; Jan;94(1):13-8.
4. Meijer A, Conradi HJ, Bos EH, Thombs BD, van Melle KP, de Jonge P. Prognostic association of depression following myocardial infarction with mortality and cardiovascular events: a meta-analysis of 25 years of research. *Gen Hosp Psychiatry* 2011; MAY-JUN;33(3):203-16.
5. Piotrowicz K, Noyes K, Lyness JM, McNitt S, Andrews ML, Dick A, et al. Physical functioning and mental well-being in association with health outcome in patients enrolled in the Multicenter Automatic Defibrillator Implantation Trial II. *Eur Heart J* 2007; Mar;28(5):601-7.
6. Nelson EC, Ferreira PL, Cleary PD, Gustafson D, Wasson JH. Do patients' health status reports predict future hospital stays for patients with an acute myocardial infarction?. *Fam Pract Res J* 1994; Jun;14(2):119-26.
7. Norekval TM, Fridlund B, Rokne B, Segadal L, Wentzel-Larsen T, Nordrehaug JE. Patient-reported outcomes as predictors of 10-year survival in women after acute myocardial infarction. *Health and Quality of Life Outcomes* 2010; NOV 25 2010;8:140.
8. Lim LLY, Johnson NA, O'Connell RL, Heller RF. Quality of life and later adverse health outcomes in patients with suspected heart attack. *Aust N Z J Public Health* 1998; AUG 1998;22(5).
9. Larsen KK, Vestergaard M, Sondergaard J, Christensen B. Rehabilitation status three months after first-time myocardial infarction. *Scand J Prim Health Care* 2011; Dec;29(4):210-5.

- 1  
2  
3  
4  
5  
6  
7  
8  
9  
10  
11  
12  
13  
14  
15  
16  
17  
18  
19  
20  
21  
22  
23  
24  
25  
26  
27  
28  
29  
30  
31  
32  
33  
34  
35  
36  
37  
38  
39  
40  
41  
42  
43  
44  
45  
46  
47  
48  
49  
50  
51  
52  
53  
54  
55  
56  
57  
58  
59  
60
10. Joensen AM, Jensen MK, Overvad K, Dethlefsen C, Schmidt E, Rasmussen L, et al. Predictive values of acute coronary syndrome discharge diagnoses differed in the Danish National Patient Registry. *J Clin Epidemiol* 2009; FEB;62(2):188-94.
11. Pedersen CB. The Danish Civil Registration System. *Scand J Public Health* 2011; Jul;39(7 Suppl):22-5.
12. Kosinski M, Ware JE, Turner-Bowker DM, Gandek B. *User's manual for the SF-12v2 health survey : with a supplement documenting the SF-12® health survey*. Lincoln, RI: QualityMetric incorporated; 2007.
13. Ware JE, Kosinski M, Keller SD. A 12-item short-form health survey - Construction of scales and preliminary tests of reliability and validity. *Med Care* 1996; MAR 1996;34(3).
14. Gandek B, Ware JE, Aaronson NK, Apolone G, Bjorner JB, Brazier JE, et al. Cross-validation of item selection and scoring for the SF-12 Health Survey in nine countries: results from the IQOLA Project. International Quality of Life Assessment. *J Clin Epidemiol* 1998; Nov;51(11):1171-8.
15. Fleishman JA, Selim AJ, Kazis LE. Deriving SF-12v2 physical and mental health summary scores: a comparison of different scoring algorithms. *Quality of Life Research* 2010; MAR 2010;19(2).
16. Zigmond AS, Snaith RP. The Hospital Anxiety and Depression Scale. *Acta Psychiatr Scand* 1983; 1983;67(6).
17. Johnston M, Pollard B, Hennessey P. Construct validation of the hospital anxiety and depression scale with clinical populations. *J Psychosom Res* 2000; JUN 2000;48(6).
18. Martin C, Lewin R, Thompson D. A confirmatory factor analysis of the Hospital Anxiety and Depression Scale in coronary care patients following acute myocardial infarction. *Psychiatry Res* 2003; AUG 2003;120(1):85-94.
19. Thombs BD, Magyar-Russell G, Bass EB, Stewart KJ, Tsilidis KK, Bush DE, et al. Performance characteristics of depression screening instruments in survivors of acute myocardial infarction: Review of the evidence. *Psychosomatics* 2007; JUN 2007;48(3).

- 1  
2 20. Bjelland I, Dahl AA, Haug TT, Neckelmann D. The validity of the Hospital Anxiety and Depression  
3 Scale. An updated literature review. *J Psychosom Res* 2002; Feb;52(2):69-77.  
4  
5  
6  
7 21. Frasure-Smith N, Lesperance F. Depression and anxiety as predictors of 2-year cardiac events in patients  
8 with stable coronary artery disease. *Arch Gen Psychiatry* 2008; Jan;65(1):62-71.  
9  
10  
11  
12 22. Andersen TF, Madsen M, Jorgensen J, Mellemkjoer L, Olsen JH. The Danish National Hospital Register.  
13 A valuable source of data for modern health sciences. *Dan Med Bull* 1999; Jun;46(3):263-8.  
14  
15  
16  
17 23. Carstensen B, Kristensen JK, Marcussen MM, Borch-Johnsen K. The National Diabetes Register. *Scand*  
18 *J Public Health* 2011; JUL;39:58-61.  
19  
20  
21  
22 24. Johannessdottir SA, Horvath-Puho E, Ehrenstein V, Schmidt M, Pedersen L, Sorensen HT. Existing data  
23 sources for clinical epidemiology: The Danish National Database of Reimbursed Prescriptions. *Clin*  
24 *Epidemiol* 2012;4:303-13.  
25  
26  
27  
28  
29  
30 25. Fletcher C. Standardized questionnaires on respiratory symptoms. A statement prepared for, and approved  
31 by, the Medical Research Council's Committee on the aetiology of chronic bronchitis. *Br Med J*  
32 1960;2:1665.  
33  
34  
35  
36  
37 26. Vestbo J, Knudsen KM, Rasmussen FV. Should we Continue using Questionnaires on Breathlessness in  
38 Epidemiologic Surveys. *Am Rev Respir Dis* 1988; MAY 1988;137(5).  
39  
40  
41  
42 27. Ades PA. Cardiac rehabilitation and secondary prevention of coronary heart disease. *N Engl J Med* 2001;  
43 Sep 20;345(12):892-902.  
44  
45  
46  
47 28. Giannuzzi P, Saner H, Bjornstad H, Fioretti P, Mendes M, Cohen-Solal A, et al. Secondary prevention  
48 through cardiac rehabilitation: position paper of the Working Group on Cardiac Rehabilitation and Exercise  
49 Physiology of the European Society of Cardiology. *Eur Heart J* 2003; Jul;24(13):1273-8.  
50  
51  
52  
53  
54  
55 29. Statistics Denmark. *IDA: An integrated database for labour market research: Main report*. Copenhagen,  
56 Denmark: Statistics Denmark; 1991.  
57  
58  
59  
60



- 1  
2  
3  
4  
5  
6  
7  
8  
9  
10  
11  
12  
13  
14  
15  
16  
17  
18  
19  
20  
21  
22  
23  
24  
25  
26  
27  
28  
29  
30  
31  
32  
33  
34  
35  
36  
37  
38  
39  
40  
41  
42  
43  
44  
45  
46  
47  
48  
49  
50  
51  
52  
53  
54  
55  
56  
57  
58  
59  
60
30. Barnett K, Mercer SW, Norbury M, Watt G, Wyke S, Guthrie B. Epidemiology of multimorbidity and implications for health care, research, and medical education: a cross-sectional study. *Lancet* 2012; Jul 7;380(9836):37-43.
31. Farivar SS, Cunningham WE, Hays RD. Correlated physical and mental health summary scores for the SF-36 and SF-12 Health Survey, V.I. *Health and Quality of Life Outcomes* 2007; SEP 7 2007;5:54.
32. Pelle AJ, Kupper N, Mols F, de Jonge P. What is the use? Application of the short form (SF) questionnaires for the evaluation of treatment effects. *Qual Life Res* 2012; Sep 14;.
33. Hann M, Reeves D. The SF-36 scales are not accurately summarised by independent physical and mental component scores. *Quality of Life Research* 2008; APR 2008;17(3).
34. Hoang U, Stewart R, Goldacre MJ. Mortality after hospital discharge for people with schizophrenia or bipolar disorder: retrospective study of linked English hospital episode statistics, 1999-2006. *BMJ* 2011; Sep 13;343:d5422.
35. Whooley MA, de Jonge P, Vittinghoff E, Otte C, Moos R, Carney RM, et al. Depressive Symptoms, Health Behaviors, and Risk of Cardiovascular Events in Patients With Coronary Heart Disease. *Jama-Journal of the American Medical Association* 2008; NOV 26 2008;300(20).
36. Rumsfeld JS, Ho PM. Depression and cardiovascular disease: a call for recognition. *Circulation* 2005; Jan 25;111(3):250-3.
37. Murphy AW, Cupples ME, Smith SM, Byrne M, Byrne MC, Newell J, et al. Effect of tailored practice and patient care plans on secondary prevention of heart disease in general practice: cluster randomised controlled trial. *BMJ* 2009; Oct 29;339:b4220.

STROBE 2007 (v4) Statement—Checklist of items that should be included in reports of cohort studies

| Section/Topic                | Item # | Recommendation                                                                                                                                                                       | Reported on page # |
|------------------------------|--------|--------------------------------------------------------------------------------------------------------------------------------------------------------------------------------------|--------------------|
| Title and abstract           | 1      | (a) Indicate the study’s design with a commonly used term in the title or the abstract                                                                                               | 1                  |
|                              |        | (b) Provide in the abstract an informative and balanced summary of what was done and what was found                                                                                  | 2                  |
| <b>Introduction</b>          |        |                                                                                                                                                                                      |                    |
| Background/rationale         | 2      | Explain the scientific background and rationale for the investigation being reported                                                                                                 | 3                  |
| Objectives                   | 3      | State specific objectives, including any prespecified hypotheses                                                                                                                     | 3                  |
| <b>Methods</b>               |        |                                                                                                                                                                                      |                    |
| Study design                 | 4      | Present key elements of study design early in the paper                                                                                                                              | 3-4                |
| Setting                      | 5      | Describe the setting, locations, and relevant dates, including periods of recruitment, exposure, follow-up, and data collection                                                      | 3-4, 6             |
| Participants                 | 6      | (a) Give the eligibility criteria, and the sources and methods of selection of participants. Describe methods of follow-up                                                           | 3-4, 6             |
|                              |        | (b) For matched studies, give matching criteria and number of exposed and unexposed                                                                                                  | -                  |
| Variables                    | 7      | Clearly define all outcomes, exposures, predictors, potential confounders, and effect modifiers. Give diagnostic criteria, if applicable                                             | 3-6                |
| Data sources/<br>measurement | 8*     | For each variable of interest, give sources of data and details of methods of assessment (measurement). Describe comparability of assessment methods if there is more than one group | 3-6                |
| Bias                         | 9      | Describe any efforts to address potential sources of bias                                                                                                                            | 6-7, 9-11          |
| Study size                   | 10     | Explain how the study size was arrived at                                                                                                                                            | 3                  |
| Quantitative variables       | 11     | Explain how quantitative variables were handled in the analyses. If applicable, describe which groupings were chosen and why                                                         | 4-7                |
| Statistical methods          | 12     | (a) Describe all statistical methods, including those used to control for confounding                                                                                                | 6-7                |
|                              |        | (b) Describe any methods used to examine subgroups and interactions                                                                                                                  | 7                  |
|                              |        | (c) Explain how missing data were addressed                                                                                                                                          | 7                  |
|                              |        | (d) If applicable, explain how loss to follow-up was addressed                                                                                                                       | -                  |
|                              |        | (e) Describe any sensitivity analyses                                                                                                                                                | 6-7, 10-11         |
| <b>Results</b>               |        |                                                                                                                                                                                      |                    |

|                          |     |                                                                                                                                                                                                              |          |
|--------------------------|-----|--------------------------------------------------------------------------------------------------------------------------------------------------------------------------------------------------------------|----------|
| Participants             | 13* | (a) Report numbers of individuals at each stage of study—eg numbers potentially eligible, examined for eligibility, confirmed eligible, included in the study, completing follow-up, and analysed            | 3, 8     |
|                          |     | (b) Give reasons for non-participation at each stage                                                                                                                                                         | 3        |
|                          |     | (c) Consider use of a flow diagram                                                                                                                                                                           | 3        |
| Descriptive data         | 14* | (a) Give characteristics of study participants (eg demographic, clinical, social) and information on exposures and potential confounders                                                                     | 8, 14    |
|                          |     | (b) Indicate number of participants with missing data for each variable of interest                                                                                                                          | 7        |
|                          |     | (c) Summarise follow-up time (eg, average and total amount)                                                                                                                                                  | 8        |
| Outcome data             | 15* | Report numbers of outcome events or summary measures over time                                                                                                                                               | 8, 15    |
| Main results             | 16  | (a) Give unadjusted estimates and, if applicable, confounder-adjusted estimates and their precision (eg, 95% confidence interval). Make clear which confounders were adjusted for and why they were included | 7-9, 15  |
|                          |     | (b) Report category boundaries when continuous variables were categorized                                                                                                                                    | 14       |
|                          |     | (c) If relevant, consider translating estimates of relative risk into absolute risk for a meaningful time period                                                                                             | 8, 15    |
| Other analyses           | 17  | Report other analyses done—eg analyses of subgroups and interactions, and sensitivity analyses                                                                                                               | 8, 10-11 |
| <b>Discussion</b>        |     |                                                                                                                                                                                                              |          |
| Key results              | 18  | Summarise key results with reference to study objectives                                                                                                                                                     | 9-13     |
| <b>Limitations</b>       |     |                                                                                                                                                                                                              |          |
| Interpretation           | 20  | Give a cautious overall interpretation of results considering objectives, limitations, multiplicity of analyses, results from similar studies, and other relevant evidence                                   | 9-13     |
| Generalisability         | 21  | Discuss the generalisability (external validity) of the study results                                                                                                                                        | 9        |
| <b>Other information</b> |     |                                                                                                                                                                                                              |          |
| Funding                  | 22  | Give the source of funding and the role of the funders for the present study and, if applicable, for the original study on which the present article is based                                                | 13       |

\*Give information separately for cases and controls in case-control studies and, if applicable, for exposed and unexposed groups in cohort and cross-sectional studies.

**Note:** An Explanation and Elaboration article discusses each checklist item and gives methodological background and published examples of transparent reporting. The STROBE checklist is best used in conjunction with this article (freely available on the Web sites of PLoS Medicine at <http://www.plosmedicine.org/>, Annals of Internal Medicine at <http://www.annals.org/>, and Epidemiology at <http://www.epidem.com/>). Information on the STROBE Initiative is available at [www.strobe-statement.org](http://www.strobe-statement.org).



**Mental health status and risk of new cardiovascular events  
or death in patients with myocardial infarction: a  
population-based cohort study**

|                                 |                                                                                                                                                                                                                                                                                                                                                                                                                                                                                                                                                                                                                        |
|---------------------------------|------------------------------------------------------------------------------------------------------------------------------------------------------------------------------------------------------------------------------------------------------------------------------------------------------------------------------------------------------------------------------------------------------------------------------------------------------------------------------------------------------------------------------------------------------------------------------------------------------------------------|
| Journal:                        | <i>BMJ Open</i>                                                                                                                                                                                                                                                                                                                                                                                                                                                                                                                                                                                                        |
| Manuscript ID:                  | bmjopen-2013-003045.R1                                                                                                                                                                                                                                                                                                                                                                                                                                                                                                                                                                                                 |
| Article Type:                   | Research                                                                                                                                                                                                                                                                                                                                                                                                                                                                                                                                                                                                               |
| Date Submitted by the Author:   | 03-Jul-2013                                                                                                                                                                                                                                                                                                                                                                                                                                                                                                                                                                                                            |
| Complete List of Authors:       | Nielsen, Tine; Section for General Medical Practice, Department of Public Health, Aarhus University<br>Vestergaard, Mogens; Section for General Medical Practice and Research Unit for General Practice, Department of Public Health, Aarhus University<br>Christensen, Bo; Section for General Medical Practice, Department of Public Health, Aarhus University<br>Christensen, Kaj; Research Unit for General Practice, Department of Public Health, Aarhus University<br>Larsen, Karen; Section for General Medical Practice and Research Unit for General Practice, Department of Public Health, Aarhus University |
| <b>Primary Subject Heading</b>: | Cardiovascular medicine                                                                                                                                                                                                                                                                                                                                                                                                                                                                                                                                                                                                |
| Secondary Subject Heading:      | Mental health, Epidemiology                                                                                                                                                                                                                                                                                                                                                                                                                                                                                                                                                                                            |
| Keywords:                       | CARDIOLOGY, Myocardial infarction < CARDIOLOGY, MENTAL HEALTH, EPIDEMIOLOGY, Cardiac Epidemiology < CARDIOLOGY, Ischaemic heart disease < CARDIOLOGY                                                                                                                                                                                                                                                                                                                                                                                                                                                                   |
|                                 |                                                                                                                                                                                                                                                                                                                                                                                                                                                                                                                                                                                                                        |

SCHOLARONE™  
Manuscripts

1  
2  
3  
4  
5  
6  
7  
8  
9  
10  
11  
12  
13  
14  
15  
16  
17  
18  
19  
20  
21  
22  
23  
24  
25  
26  
27  
28  
29  
30  
31  
32  
33  
34  
35  
36  
37  
38  
39  
40  
41  
42  
43  
44  
45  
46  
47  
48  
49  
50  
51  
52  
53  
54  
55  
56  
57  
58  
59  
60

## **Mental health status and risk of new cardiovascular events or death in patients with myocardial infarction: a population-based cohort study**

Tine Jepsen Nielsen, Mogens Vestergaard, Bo Christensen, Kaj Sparle Christensen, Karen Kjær Larsen

Section for General Medical Practice, Aarhus University, Bartholins Allé 2, 8000 Aarhus C, Denmark

Tine Jepsen Nielsen  
Junior research fellow

Section for General Medical Practice and Research Unit for General Practice, Aarhus University, Bartholins Allé 2, 8000 Aarhus C, Denmark

Mogens Vestergaard  
Professor

Section for General Medical Practice, Aarhus University, Bartholins Allé 2, 8000 Aarhus C, Denmark

Bo Christensen  
Professor

Research Unit for General Practice, Aarhus University, Bartholins Allé 2, 8000 Aarhus C, Denmark

Kaj Sparle Christensen  
Senior researcher

Section for General Medical Practice and Research Unit for General Practice, Aarhus University, Bartholins Allé 2, 8000 Aarhus C, Denmark

Karen Kjær Larsen  
PhD fellow

Correspondence to: TJ Nielsen. E-mail: [tjn@folkesundhed.au.dk](mailto:tjn@folkesundhed.au.dk)

## ARTICLE SUMMARY

### Article focus

- Myocardial infarction (MI) is often followed by mental health problems such as depression, anxiety, and low mental health status.
- Mounting evidence indicates that depression and anxiety after MI increase the risk of adverse long-term outcome. No previous studies have examined the association between mental health status after MI and outcome, independent of depression and anxiety.
- This study examines the association between mental health status after first-time MI and new cardiovascular events or death, when taking into account depression and anxiety as well as clinical, socio-demographic, and behavioural risk factors.

### Key messages

- During three years after the MI, patients with the lowest mental health status had an almost 50% risk of new cardiovascular events or death.
- Low mental health status after MI was a strong predictor of new cardiovascular events or death, independent of depression, anxiety and clinical, socio-demographic, and behavioural risk factors.

### Strengths and limitations of this study

- Major strengths of this study are its population-based nature and the homogenous study population. The response rate was reasonably high, and information on outcome was collected without loss to follow-up.
- We were able to take into account important mediators such as depression, anxiety, and potential behavioural mediators such as physical activity. However, we cannot rule out the possibility of residual confounding.

**Abstract**

**Objective** To examine the association between mental health status after first-time myocardial infarction (MI) and new cardiovascular events or death, taking into account depression and anxiety as well as clinical, socio-demographic, and behavioural risk factors.

**Design** Population-based cohort study based on questionnaires and nationwide registries. Mental health status was assessed three months after the MI using the Mental Component Summary score from the Short-Form 12 version 2.

**Setting** Central Denmark Region.

**Participants** All patients hospitalised with first-time MI from 1 January 2009 through 31 December 2009 (n=880). The participants were categorised in quartiles according to level of mental health status (1<sup>st</sup> quartile=lowest mental health status).

**Main outcome measures** Composite endpoint of new cardiovascular events (MI, heart failure, stroke/transient ischaemic attack) and all-cause mortality.

**Results** During 1,940 person-years of follow-up, 277 persons experienced a new cardiovascular event or died. The cumulative incidence following three years after the MI increased consistently with decreasing mental health status and was 15.0% (95% confidence interval 10.8% to 20.5%) for persons in the fourth quartile 29.1% (23.5% to 35.6%) in the third quartile, 37.0% (30.9% to 43.9%) in the second quartile, and 47.5% (40.9% to 54.5%) in the first quartile. The hazard ratios (HR) were high, even after adjustments for age, socio-demographic characteristics, cardiac disease severity, comorbidity, secondary prophylactic medication, smoking status, physical activity, depression, and anxiety (HR<sub>3rd quartile</sub> 1.90 (95% confidence interval 1.23 to 2.93), HR<sub>2nd quartile</sub> 2.14 (1.37 to 3.33), HR<sub>1st quartile</sub> 2.23 (1.35 to 3.68) when using the fourth quartile as reference).

**Conclusions** Low mental health status following first-time MI was independently associated with an increased risk of new cardiovascular events or death. Further research is needed to disentangle the pathways that link mental health status following MI to prognosis and to identify interventions that can improve both mental health status and prognosis.

## INTRODUCTION

Myocardial infarction (MI) is a severe life event followed by an increased risk of mental health problems such as depression,<sup>1</sup> anxiety,<sup>2</sup> and low mental health status.<sup>3</sup> Several studies have shown that depression<sup>4</sup> and anxiety<sup>2</sup> after MI is associated with a higher risk of cardiovascular events and death, but much less is known about the impact of broader measures of mental health. Mental health status is a generic and broad measure of mental health, which may be useful as a tool to quantify important prognostic aspects of mental health not captured by the more disease-specific measures of depression and anxiety. Four studies<sup>5-8</sup> have investigated the association between mental health status following MI and prognosis. All these have found that low mental health status was significantly associated with increased risk of adverse outcome, independent of clinical risk factors. However, since none of the former studies adjusted for depression or anxiety, it remains unknown whether mental health status in itself adds unique knowledge about the prognosis.

Our aim was to examine the association between mental health status and new cardiovascular events or death in patients with first-time MI when taking into account depression, anxiety, and clinical, socio-demographic, and behavioural risk factors.

## METHODS

We conducted a population-based cohort study comprising people in the Central Denmark Region (1,250,000 inhabitants) with a first-time MI based on data from nationwide registers and questionnaires.

### Participants

We consecutively invited all patients discharged from hospital with a first-time MI from 1 January 2009 to 31 December 2009. The establishment of the cohort is described in detail elsewhere.<sup>9</sup> Data on patients discharged with MI (in accordance with the International Classification of Diseases (ICD-10) code I21)<sup>10</sup> were received from the Danish National Patient Register on a monthly basis. Patients who had been discharged with MI between 1994 and 2008 were excluded to identify first-time cases. Information on name, address, and vital status was obtained from the Civil Registration System,<sup>11</sup> which also provided the unique personal identification number used to link data between the registers and questionnaires.



## Data collection

A pilot-tested hard-copy questionnaire was sent to all participants 12 to 14 weeks after their discharge from hospital, and non-responders received two reminders.<sup>9</sup> The study was approved by the Danish Data Protection Agency (J.nr. 2009-41-3018), the Scientific Research Evaluation Committee of the Danish Academy of General Practitioners (ref. no. 03-2009), and written informed consent was obtained from all participants.

## Mental health status

Mental health status was measured using the Mental Component Summary (MCS) score from the validated Danish version of the Short-Form 12 version 2 Health Survey (SF-12).<sup>12-14</sup> The SF-12 consists of 12 items, the MCS score comprises mainly of the six mental items ('Vitality', 'Role-Emotional' (2 items), 'Social Function', and 'Mental Health' (2 items)), but the six physical items are also included in the computation.<sup>12</sup> The SF-12 scores were calculated following the norm-based scoring algorithm<sup>12</sup> using weights derived from confirmatory factor analysis.<sup>15</sup> The MCS score is thus linearly transformed in a way that allows comparison with the mean score (50) and the standard deviation (SD) (10) in the general US population in 1998.<sup>12</sup> The MCS has demonstrated good construct validity.<sup>15</sup> The wording of the mental health status items can be found in the supplemental material (**eFigure 1**).

## Depression and anxiety

We assessed depression and anxiety symptoms using the Hospital Anxiety and Depression Scale (HADS).<sup>16</sup> The participants were categorised as having anxiety or depression if they had a score of  $\geq 8$  on the HADS-A scale or the HADS-D scale. The HADS was designed to be valid in clinical populations with symptoms of physical disease and hence leaves out items that may be endorsed by physical rather than mental states.<sup>16, 17</sup> The HADS has formerly been validated in MI patients<sup>18, 19</sup> and has proven to have satisfactory reliability (HADS-A and HADS-D Cronbach's  $\alpha \approx 0.80$ ).<sup>18, 20</sup> Among MI patients, a HADS-D $\geq 8$  identified possible cases of depression with a sensitivity of 65% and a specificity of 90% (compared with a diagnosis of depression based on a Structured Clinical Interview for DSM-IV).<sup>19</sup> Among acute coronary syndrome patients, a HADS-A $\geq 8$  identified possible cases of anxiety with a sensitivity of 91% and a specificity of 61% (compared with a diagnosis of generalised anxiety disorder based on a Structured Clinical Interview for DSM-IV).<sup>21</sup>

### Co-morbidity and cardiac disease severity

Information on co-morbidity was retrieved from the Danish National Patient Register,<sup>22</sup> the Danish National Diabetes Register,<sup>23</sup> and the prescription database covering the entire Central Denmark Region.<sup>24</sup> The Danish National Patient Register provided information on stroke (ICD-10: I61, I63, I64), transient cerebral ischemic attack (ICD-10: DG45, DG46), heart failure (ICD-10: I11.0, I13.0, I13.2, I42.0, I42.6, I42.7, I42.9, I50.0, I50.1, I50.9), and revascularization (ICD-10: KFN, KFW) from 1994 to 2008. The Danish National Diabetes Register provided information on diabetes mellitus from 1990 to 2008 according to an algorithm developed on the basis of information from four nationwide registers.<sup>23</sup> The prescription database provided information on all reimbursed drugs according to the Anatomical Therapeutic Chemical Classification System (ATC), dispensing dates, and the total number of tablets dispensed. Participants were categorised with hypertension if they had redeemed prescriptions for at least two classes of antihypertensive drugs (ATC: C02A-D, C02L, C03A-B, C03D-E, C03X, C04, C05, C07, C08, C09) 0 to 180 days before the index MI. Participants were categorised with depression before MI if they had redeemed a prescription for an antidepressant (ATC: N06A) 0 to 180 days before the index MI. Participants were categorised with severe mental disorder if they had redeemed a prescription for antipsychotics (ATC: N05A) 0 to 180 days before the index MI.

Cardiac disease severity was measured by the British Medical Research Council (MRC) dyspnea score, a self-report instrument.<sup>25</sup> A score  $\geq 3$  has been shown to provide a simple and valid method for predicting overall mortality.<sup>26</sup>

### Health behaviour, health care interventions, and socio-demographics

Data on smoking, alcohol use, physical activity, intake of fruit and vegetables, intake of fish, intake of fish oil supplement, height, and weight (body mass index=weight [kg] per height [m<sup>2</sup>]) were self-reported and classified according to the general recommendations from the Danish National Board of Health.<sup>9</sup> To assess physical activity, we asked, "How many days per week are you generally physically active for at least 30 minutes per day? You may include any physical activity at work or in your spare time that makes your pulse rate increase". Response options were from zero days to every day per week. Physical activity was computed as a continuous variable (days/week).

We defined cardiac rehabilitation<sup>27, 28</sup> in the questionnaire and asked whether they had participated in hospital-based phase two cardiac rehabilitation. Those who responded "yes,

1  
2 and I took part" were classified as 'participants' those who responded "yes, but I didn't take  
3 part" or "no" were classified as 'non-participants'.<sup>9</sup>

4  
5 Drug prescription data were obtained from the prescription database.<sup>24</sup> Data on aspirin  
6 (ATC: B01AC06), clopidogrel (ATC: B01AC04), statins (ATC: C10AA),  $\beta$ -blockers (ATC: C07),  
7 ACE-inhibitors/angiotensin 2 receptor blockers (ATC: C09), furosemide (ATC: C03C),  
8 aldosterone antagonists (ATC: C03D), and antidepressants (ATC: N06A) were collected. We  
9 calculated whether the participant had tablets available on the day that we sent the  
10 questionnaire (the number of tablets on the last redeemed prescription before the  
11 questionnaire was sent  $\geq$  the number of days to the questionnaire was sent) and defined the  
12 participant as 'receiving treatment' if tablets were available. We defined the participant as  
13 'receiving secondary prophylactic medication' if the participant was receiving treatment with  
14 three or more of the following drugs: aspirin, clopidogrel, statins, and  $\beta$ -blockers. We defined  
15 the participant as 'receiving heart failure medication' if the participant was receiving  
16 treatment with furosemide or aldosterone antagonists.

17  
18 Data on age at MI and sex were obtained from the Civil Registration System.<sup>11</sup> Each  
19 participant's socio-demographic characteristics (cohabitation status, education, labour  
20 market status) from the year before MI (2008) were retrieved from the Danish Integrated  
21 Database for Labour Market Research.<sup>29</sup>

### 22 23 24 25 26 27 28 29 30 31 32 33 34 35 **Cardiovascular events and death**

36 Outcome events were measured as a composite endpoint comprising new cardiovascular  
37 events (MI, heart failure, stroke or transient ischaemic attack) and all-cause mortality.  
38 Information on outcomes was collected from baseline (the day we sent the questionnaire) to  
39 the last day of follow-up (31 July 2012). The Danish National Patient Register<sup>22</sup> provided  
40 information on cardiovascular events. Vital status (dead or alive) was obtained from the Civil  
41 Registration System.<sup>11</sup>

### 42 43 44 45 46 47 48 **Statistical analysis**

49 Neither natural thresholds nor clinically based thresholds are defined for the MCS score, so  
50 we divided the participants into quartiles according to their score (1<sup>st</sup> quartile had the lowest  
51 score; 4<sup>th</sup> quartile had the highest score). This categorisation was done to enhance clinical  
52 interpretability and to evaluate a possible dose response relationship.

53  
54  
55  
56  
57 In order to address the potential risk of selection bias, we used antidepressant  
58 consumption as a proxy for depression and calculated hazard ratios (HRs) for the association  
59  
60

1  
2 between antidepressant consumption and new cardiovascular events or death for both  
3 participants and non-participants.

4  
5 The association between baseline characteristics and MCS score was assessed using  $\chi^2$   
6 statistics for categorical variables and analysis of variance for continuous variables, or  
7 Kruskal-Wallis tests when the conditions for analysis of variance were not fulfilled.  
8

9  
10 We calculated the event-free survival time as the time from three months after the MI  
11 (baseline evaluation of mental health status) to the first cardiovascular event or death. If no  
12 event or death occurred, the participant was censored on 31 July 2012. Two persons  
13 emigrated during the time of follow-up, and they were censored on the day of their  
14 emigration. Owing to the use of nationwide registers, we had complete follow-up of all  
15 participants.  
16  
17  
18  
19

20  
21 The unadjusted association between mental health status and new cardiovascular events  
22 or death was presented graphically with Kaplan-Meier curves. The cumulative incidence three  
23 years after the MI was estimated using the cumulative hazards function, and identical  
24 incidence was tested using the log-rank test.  
25  
26

27  
28 The risk of cardiovascular events or death associated with mental health status was  
29 compared using Cox proportional hazards regression. The covariates for the multivariate  
30 model (age, sex, cohabitation status, education, labour market status, cardiac disease severity,  
31 history of stroke, diabetes mellitus, heart failure, secondary prophylactic medication, smoking  
32 status, physical activity, depression, and anxiety) were chosen on the basis of previous  
33 studies. To check for multicollinearity between depression/anxiety symptoms and mental  
34 health status we calculated the variance inflation factor which was 1.5. Values above 10  
35 indicate multicollinearity.<sup>30</sup> We evaluated whether the HRs of mental health status following  
36 MI varied by subgroups by testing for interaction using Wald test in an age-adjusted model,  
37 and the results are presented in a forest plot. Too few outcome events were available to test  
38 for interaction in quartiles, so we tested it in a dichotomised (median cut) model. We excluded  
39 variables with less than five events in a subgroup.  
40  
41  
42  
43  
44  
45  
46  
47

48 Finally, we calculated HRs for the association between each of the mental health status  
49 items (continuous; per one-point lower item score) and outcome.

50  
51 No variable had more than 0.3% missing data, except body mass index (for which 2.5%  
52 data were missing) and education (for which 3.3% data were missing), and analyses were  
53 done on complete data only.  $P < 0.05$  was considered statistically significant.  
54  
55  
56  
57  
58  
59  
60

## RESULTS

### Participant characteristics

Among a total of 1,288 eligible patients with first-time MI, 880 (68.3%) completed the SF-12, and the mean MCS score was 44.9 (SD 11.5). Non-participants were more often women, older, had fewer socioeconomic resources, and more comorbid conditions than participants (Web Extra Supplement Table A). The estimates of the association between antidepressant consumption and new cardiovascular events or death in participants, HR 1.55 (95% confidence interval 1.12 to 2.14) and in non-participants, HR 1.46 (1.01 to 2.10), were similar. Compared to participants with higher mental health status, the participants with the lowest mental health status (1st quartile, table 1) were impaired in a range of variables; e.g. symptoms of depression and anxiety, cardiac disease severity, comorbidity, socioeconomic resources, and health behaviour.

### Cumulative incidence

A total of 277 outcomes (230 new cardiovascular events and 47 deaths) occurred during 1,940 person years of follow-up (median 2.6 years, SD 1.0). The Kaplan-Meier curves (figure 1) show that the unadjusted risk of a cardiovascular event or death increased with decreasing mental health status. During three years after the MI, the cumulative incidence of the composite endpoint was 47.5% (95% confidence interval 40.9% to 54.5%) for persons in the first, 37.0% (30.9% to 43.9%) in the second, 29.1% (23.5% to 35.6%) in the third, and 15.0% (10.8% to 20.5%) in the fourth quartile,  $P < 0.001$ .

### Association between mental health status and new cardiovascular events or death

The age-adjusted HRs for new cardiovascular events or death in post-MI patients increased with decreasing mental health status (HR<sub>3rd quartile</sub> 2.09 (95% confidence interval 1.36 to 3.19), HR<sub>2nd quartile</sub> 2.67 (1.77 to 4.03), HR<sub>1st quartile</sub> 3.53 (2.36 to 5.27), table 2). Additional adjustment for cardiac disease severity, physical activity, depression, and anxiety attenuated the association. In the fully adjusted model, the MI patients with the lowest mental health status had a more than two-fold higher risk of new cardiovascular events or death compared to the patients with the highest mental health status (table 2).

We found no statistically significant difference in the HRs between any subgroups of MI patients (figure 2).

### Exploratory analysis of the six mental health status items

Table 3 outlines the association between mental health status item scores and subsequent cardiovascular events or death. The items were entered as continuous variables and the HRs reflect the risk of new cardiovascular events or death per one point lower item score. The largest HRs were seen for the 'Vitality' item, HR 1.24 (95% confidence interval 1.09 to 1.42), the 'Mental Health' item 1, HR 1.19 (1.04 to 1.35), and the 'Role-Emotional' item 1, HR 1.16 (1.04 to 1.29).

## DISCUSSION

In this population-based cohort study, we found that low mental health status after first-time MI predicted an increased risk of new cardiovascular events or death in a dose-response manner. The association was explained partly by cardiac disease severity, physical activity, depression, and anxiety. However, even after adjustments for these variables, patients with the lowest mental health status had a more than two-fold higher risk of new cardiovascular events or death compared to those with the highest mental health status.

### Strengths and limitations of the study

Major strengths of this study are its population-based nature and the homogenous study population; we invited all patients with first-time MI during one year in a well-defined area. Our response rate was reasonably high (68.3%), and information on outcome was collected without loss to follow-up. Non-participants tended to have fewer social resources and more comorbid conditions, and they hence resembled the participants with the lowest mental health status. In order to address the potential risk of selection bias, we used antidepressant consumption as a proxy for depressive symptoms similarly to previous studies.<sup>31</sup> The estimates of the association between antidepressant consumption and new cardiovascular events or death in participants and non-participants were similar. Thus, bias due to selection of study participants seems to be an unlikely explanation for our findings.

Information on MI was registered prospectively and did not rely on the participants' or the relatives' memory. The MI diagnosis in the Danish National Patient Register was based on the current European Society of Cardiology criteria for MI, coded by the physician in charge of the discharge, and the information is known to have a high sensitivity (90%) and specificity (92%).<sup>10</sup> The specificity was even higher in our study because we confirmed the MI diagnosis by reviewing the discharge summaries,<sup>9</sup> and this reduced the risk of information bias. We also

1  
2 reduced the risk of information bias by using previously translated and validated scales, pilot  
3 testing the questionnaire among MI patients, and using high-quality register data.

4  
5 We used a new algorithm for the calculation of the MCS score from the SF-12 version 2  
6 using weights constructed by oblique confirmatory factor analysis, which allows the physical  
7 and mental component summary score to be correlated. Fleishman et al developed this new  
8 scoring algorithm<sup>15</sup> due to controversy regarding the traditional scoring algorithm.<sup>32-34</sup> The  
9 traditional scoring algorithm forces mental and physical health to be uncorrelated.  
10 Consequently, when physical scores are well below the mean and mental scores somewhat  
11 less below the mean, as is often the case in patients with physical illness, this scoring method  
12 will result in an artifactual migration of the MCS score towards the mean.<sup>32</sup> In sub-analyses,  
13 we estimated HRs based on traditionally computed MCS scores (Web Extra Supplement Table  
14 B). As expected, they were smaller compared to the HRs based on MCS scores computed with  
15 the new scoring algorithm. We evaluated mental health status three months after MI, allowing  
16 mental health to reach a more stable level after this major life event.

17  
18 A diagnosis of depression or anxiety should ideally be based on a diagnostic interview.  
19 Since a previous study has estimated the sensitivity of the HADS-D $\geq$ 8 for identification of  
20 depression to be 65% in MI patients,<sup>19</sup> a substantial number of participants with depression  
21 may have been misclassified as not having depression. However, we identified 18.3% with  
22 depression in our population (HADS-D $\geq$ 8), which is in keeping with the prevalence of post-MI  
23 depression identified by structured clinical interviews in other studies (19.8%).<sup>1</sup> We found no  
24 studies reporting on the sensitivity and specificity of the HADS-A in an MI population.  
25 However, among acute coronary syndrome patients, a HADS-A $\geq$ 8 had a sensitivity of 91%.<sup>21</sup>  
26 Accordingly, we most likely identified the majority of patients with anxiety. In a sensitivity  
27 analysis, we excluded patients with depression or anxiety (HADS-A/D $\geq$ 8), and this did not  
28 weaken the estimates (Web Extra Supplement Table C).

29  
30 Schizophrenia and bipolar disorder are known to be associated with a higher risk of  
31 mortality, and part of this excess risk is attributable to cardiovascular diseases.<sup>35</sup> We used a  
32 prescription of antipsychotics, between MI and 180 days before, as an approximation of  
33 severe mental disorder. Thirteen participants had redeemed such a prescription. To examine  
34 how much of the association could be explained by these patients, we excluded this group in a  
35 sensitivity analysis (not shown), and this did not weaken the estimates.

36  
37 Lifestyle behaviour was self-reported, and participants with low mental health status may  
38 have been more likely to underreport adverse lifestyle, including physical inactivity. However,  
39 participants with low mental health status did in fact report adverse lifestyle in our study, and  
40  
41  
42  
43  
44  
45  
46  
47  
48  
49  
50  
51  
52  
53  
54  
55  
56  
57  
58  
59  
60

1  
2 a study on depression<sup>36</sup> found no differences when substituting self-reported physical activity  
3 with an objective measure of physical fitness.  
4

5 Information on a range of participant characteristics and the large sample size allowed us  
6 to take into account several potential confounders, such as socio-demographic characteristics,  
7 cardiac disease severity, comorbidity, and behavioural factors. In sub-analyses, we adjusted  
8 for other potential confounders (body mass index, hypertension, history of depression,  
9 antidepressant use, intake of alcohol, fish, and fruit, and participation in phase two cardiac  
10 rehabilitation), but this did not change the estimates ( $\leq 4\%$ ). However, we cannot rule out the  
11 possibility of residual confounding.  
12  
13  
14  
15  
16  
17

### 18 19 **Comparison with other studies**

20 Four previous studies<sup>5-8</sup> have investigated the association between mental health status after  
21 MI and prognosis independent of various clinical risk factors, such as disease severity. They  
22 used different measures of mental health status (COOP charts,<sup>6</sup> Quality of Life after MI  
23 questionnaire,<sup>8</sup> the World Health Organization Quality of Life Instrument Abbreviated,<sup>7</sup> and  
24 SF-12<sup>5</sup>), and they all found an independent association between low mental health status and  
25 higher risk of adverse outcomes. Compared with our study, these studies were conducted in  
26 modest-sized cohorts (n=112,<sup>6</sup> 375,<sup>8</sup> 145<sup>7</sup>), had short follow-up (four to five months,<sup>6</sup> 18  
27 months<sup>8</sup>), mental health status was assessed up to five years or more after MI,<sup>5,7</sup> included  
28 only women<sup>7</sup> or patients who had an ejection fraction  $<30\%$ .<sup>5</sup> Most importantly, none of these  
29 four MI studies took into account important mediators such as depression, anxiety, and  
30 potential behavioural mediators such as physical activity.  
31  
32  
33  
34  
35  
36  
37  
38

39 Our study is the first to explore the association between mental health status after MI and  
40 new cardiovascular events or death in subgroups, and we identified no factors that modified  
41 the risk. However, the sample size was low in some of the subgroups.  
42  
43  
44

45 Our study is also the first to explore the association between mental health status and  
46 cardiovascular events or death on an item level. We found that the 'Vitality' item, the 'Role-  
47 Emotional' item 1, and the 'Mental Health' item 1 were significantly associated with adverse  
48 events after adjustments for clinical, socio-demographic, behavioural, and other psychological  
49 risk factors, whereas the remaining items were not. Our results indicate that these items are  
50 the most important for the association between mental health status (MCS score) and adverse  
51 events. Yet, it is important to keep in mind that the items have different weights and that the  
52 physical items are also included when computing the MCS score.<sup>12, 15</sup>  
53  
54  
55  
56  
57  
58  
59  
60



### Implications for clinicians

In addition to psychological, social, and functional impairment, clinicians should be aware that low mental health status following MI is associated with an increased risk of new cardiovascular events and death. Our results underline the importance of always considering and prioritising mental health issues in post-MI patients. In this study, we identified low mental health status after MI to be a significant risk factor for poor prognosis, independent of clinical, socio-demographic, behavioural, and other psychological risk factors. In other words, mental health status has incremental value in the identification of patients at elevated risk for adverse outcome. Adding mental health status measurement to our present risk factor armamentarium could help clinicians to distinguish between groups of patients with a very low versus a very high risk of adverse outcome, and thereby help identify vulnerable patients in need of optimised care. However, we do not know whether measurement of mental health status and improved knowledge of prognosis will translate into better outcomes for our patients. This is an important focus for future research in this field.

### Possible explanations and future research

This study suggests that mental health status may capture prognostic aspects of mental health which are not captured by measures of depression and anxiety. Further research is needed to clarify more specifically what aspects of mental health that are at play.

The underlying explanation for the association between mental health status after MI and new cardiovascular events or death remains unclear. Our study evaluated cardiac disease severity, behavioural factors, and treatment strategies concurrently with mental health status. We therefore cannot determine whether these factors were the cause or the result of the mental health status. We were unable to assess whether the association was explained by biological mechanisms (such as heart rate variability, platelet function, or inflammatory mechanisms) since we had no information on these biological variables. Future studies should incorporate such biological variables.<sup>37</sup>

Further research is also needed to identify interventions that can improve both mental health status and prognosis in MI patients. Murphy et al<sup>38</sup> examined the effectiveness of a complex intervention designed to improve outcomes, including mental health status (measured with SF-12) for patients with coronary heart disease in a cluster randomised controlled trial. The intervention was “tailored care plans for practices (practice based training in prescribing and behaviour change, administrative support, quarterly newsletter), and tailored care plans for patients (motivational interviewing, goal identification, and target

1  
2 setting for lifestyle change).<sup>38</sup> They found that admissions to hospital were significantly  
3 reduced after an intensive 18-month intervention to improve outcomes for patients with  
4 coronary heart disease, but there was no change in mental health status. It was not stated how  
5 they computed the MCS score, but they probably used the traditional scoring algorithm as the  
6 study were conducted prior to Fleishman's publication.<sup>15</sup> Hence, artifactual migration of the  
7 MCS score towards the mean in these physically ill participants may at least in part explain  
8 the lack of association.  
9  
10  
11  
12  
13

## 14 15 16 **Conclusion**

17 We found that low mental health status following MI was associated with an increased risk of  
18 new cardiovascular events or death. The association was explained partly by cardiac disease  
19 severity, physical activity, depression, and anxiety, but low mental health status remained an  
20 independent prognostic risk factor. Further research is needed to disentangle the pathways  
21 that link mental health status following MI to prognosis and, in continuation hereof, to  
22 identify interventions that can improve both mental health status and prognosis.  
23  
24  
25  
26  
27  
28

29 Contributorship: TJN, and KKL, MV, BC, KSC conceived the study idea and designed the study. KKL collected the data.  
30 TJN, and KKL, MV, BC, KSC reviewed the literature. TJN, and KKL, MV, BC, KSC directed the analyses, which were  
31 carried out by TJN. All authors participated in the discussion and interpretation of the results. TJN organised the writing  
32 and wrote the initial drafts. All authors critically revised the manuscript for intellectual content and approved the final  
33 version. TJN is the guarantor.

34 Funding: The study was supported by the Danish Independent Research Council (grant 12-126032), the Tryg  
35 Foundation (grant number 7844-07), the Danish Health Insurance Foundation (grant number 2010B013) and the  
36 Lundbeck Foundation. None of the funding sources had a role in the design, conduct, analysis, or reporting of the study.

37 Competing interests: All authors have completed the ICMJE uniform disclosure form at [www.icmje.org/coi\\_disclosure.pdf](http://www.icmje.org/coi_disclosure.pdf)  
38 and declare: TJN had financial support from the Danish Independent Research Council for the submitted work; no  
39 financial relationships with any organisations that might have an interest in the submitted work in the previous three  
40 years; no other relationships or activities that could appear to have influenced the submitted work.

41 Ethical approval: Not needed.

42 Data sharing: No additional data available.

43  
44  
45 The Corresponding Author has the right to grant on behalf of all authors and does grant on behalf of all authors, a  
46 [worldwide licence](#) to the Publishers and its licensees in perpetuity, in all forms, formats and media (whether known now  
47 or created in the future), to i) publish, reproduce, distribute, display and store the Contribution, ii) translate the  
48 Contribution into other languages, create adaptations, reprints, include within collections and create summaries, extracts  
49 and/or, abstracts of the Contribution, iii) create any other derivative work(s) based on the Contribution, iv) to exploit all  
50 subsidiary rights in the Contribution, v) the inclusion of electronic links from the Contribution to third party material where-  
51 ever it may be located; and, vi) licence any third party to do any or all of the above.  
52  
53  
54  
55  
56  
57  
58  
59  
60

Table 1 | Baseline characteristics of 880 patients with first-time myocardial infarction in 2009 by quartiles<sup>a</sup> of mental health status (Mental Component Summary score from the Short-Form 12 version 2)

| Variable <sup>b</sup>                                          | Baseline MCS Score                |                                   |                                   |                                   | P Value |
|----------------------------------------------------------------|-----------------------------------|-----------------------------------|-----------------------------------|-----------------------------------|---------|
|                                                                | 1 <sup>st</sup> Quartile<br>n=220 | 2 <sup>nd</sup> Quartile<br>n=220 | 3 <sup>rd</sup> Quartile<br>n=220 | 4 <sup>th</sup> Quartile<br>n=220 |         |
| Self-reported health <sup>e</sup>                              |                                   |                                   |                                   |                                   |         |
| Mental health status (MCS score) <sup>c</sup> , mean (range)   | 28.8<br>(11.1-37.2)               | 42.2<br>(37.2-47.0)               | 51.0<br>(47.0-54.5)               | 57.7<br>(54.5-60.8)               | <.001   |
| HADS-A/D ≥8, No. (%)                                           | 152 (69.7)                        | 79 (36.07)                        | 22 (10.0)                         | 2 (0.91)                          | <.001   |
| Socio-demographic characteristics                              |                                   |                                   |                                   |                                   |         |
| Age, y, mean (SD)                                              | 68.9 (12.4)                       | 68.4 (12.3)                       | 65.6 (11.2)                       | 64.5 (10.0)                       | <.001   |
| Male sex, No. (%)                                              | 120 (54.6)                        | 138 (62.7)                        | 177 (80.5)                        | 173 (78.6)                        | <.001   |
| Cohabitation status, living alone, No. (%) <sup>d</sup>        | 94 (42.7)                         | 82 (37.3)                         | 55 (25.0)                         | 47 (21.4)                         | <.001   |
| Education, No. (%) <sup>d</sup>                                |                                   |                                   |                                   |                                   |         |
| <10 years                                                      | 114 (53.3)                        | 105 (50.2)                        | 85 (39.7)                         | 76 (35.5)                         |         |
| 10-12 years                                                    | 76 (35.5)                         | 81 (38.8)                         | 99 (46.3)                         | 101 (47.2)                        |         |
| >12 years                                                      | 24 (11.2)                         | 23 (11.0)                         | 30 (14.0)                         | 37 (17.3)                         | .004    |
| Labour market status, No. (%) <sup>d</sup>                     |                                   |                                   |                                   |                                   |         |
| Working                                                        | 50 (22.7)                         | 70 (31.8)                         | 99 (45.0)                         | 103 (46.8)                        |         |
| Pension                                                        | 136 (61.8)                        | 123 (55.9)                        | 105 (47.7)                        | 107 (48.6)                        |         |
| Out of the work force                                          | 34 (15.5)                         | 27 (12.3)                         | 16 (7.3)                          | 10 (4.6)                          | <.001   |
| Health status <sup>e</sup>                                     |                                   |                                   |                                   |                                   |         |
| Body mass index, mean (SD)                                     | 26.5 (5.1)                        | 26.3 (4.8)                        | 26.8 (4.5)                        | 26.9 (4.5)                        | .626    |
| Comorbid conditions, No. (%) <sup>f</sup>                      |                                   |                                   |                                   |                                   |         |
| Hypertension <sup>g</sup>                                      | 88 (40.0)                         | 75 (34.1)                         | 54 (24.6)                         | 54 (24.6)                         | <.001   |
| Stroke                                                         | 21 (9.6)                          | 16 (7.3)                          | 7 (3.2)                           | 5 (2.3)                           | .002    |
| TCI                                                            | 12 (5.5)                          | 3 (1.4)                           | 3 (1.4)                           | 10 (4.6)                          | .021    |
| Revascularization                                              | 37 (16.8)                         | 16 (7.3)                          | 12 (5.5)                          | 15 (6.8)                          | <.001   |
| Heart failure                                                  | 16 (7.3)                          | 4 (1.8)                           | 4 (1.8)                           | 4 (1.8)                           | <.001   |
| Diabetes mellitus                                              | 51 (23.2)                         | 38 (17.3)                         | 24 (10.9)                         | 21 (9.6)                          | <.001   |
| Depression <sup>h</sup>                                        | 44 (20.0)                         | 21 (9.6)                          | 11 (5.0)                          | 9 (4.1)                           | <.001   |
| Cardiac disease severity <sup>e</sup>                          |                                   |                                   |                                   |                                   |         |
| MRC dyspnea score ≥3, No. (%)                                  | 110 (50.2)                        | 45 (20.5)                         | 21 (9.6)                          | 3 (1.4)                           | <.001   |
| Medication use, No. (%) <sup>e</sup>                           |                                   |                                   |                                   |                                   |         |
| Aspirin                                                        | 166 (75.5)                        | 168 (76.4)                        | 173 (78.6)                        | 186 (84.6)                        | .086    |
| Clopidogrel                                                    | 159 (72.3)                        | 164 (74.6)                        | 173 (78.6)                        | 184 (83.6)                        | .025    |
| β-blocker                                                      | 174 (79.1)                        | 181 (82.3)                        | 178 (80.9)                        | 180 (81.8)                        | .837    |
| Statin                                                         | 169 (76.8)                        | 184 (83.6)                        | 190 (86.4)                        | 195 (88.6)                        | .005    |
| ACE-inhibitors/AT-II-receptor block                            | 111 (50.5)                        | 111 (50.5)                        | 107 (48.6)                        | 100 (45.5)                        | .689    |
| Furosemide/Aldosterone antagonist                              | 93 (42.3)                         | 64 (29.1)                         | 35 (15.9)                         | 27 (12.3)                         | <.001   |
| Antidepressants                                                | 53 (24.1)                         | 24 (10.9)                         | 9 (4.1)                           | 8 (3.6)                           | <.001   |
| Secondary prophylactic medication                              | 146 (66.4)                        | 160 (72.7)                        | 162 (73.6)                        | 166 (75.5)                        | .163    |
| Potential behavioural mediators <sup>e</sup>                   |                                   |                                   |                                   |                                   |         |
| Alcohol consumption >14/21 units/wk, No. (%)                   | 8 (3.6)                           | 12 (5.5)                          | 8 (3.6)                           | 14 (6.4)                          | .438    |
| Smoking status, No. (%)                                        |                                   |                                   |                                   |                                   |         |
| Current                                                        | 54 (24.8)                         | 49 (22.4)                         | 44 (20.0)                         | 30 (13.6)                         |         |
| Past                                                           | 124 (56.9)                        | 122 (55.7)                        | 121 (55.0)                        | 128 (58.2)                        |         |
| Never                                                          | 40 (18.4)                         | 48 (21.9)                         | 55 (25.0)                         | 62 (28.2)                         | .048    |
| Intake of fruit and vegetables ≥3 portions/d, No. (%)          | 69 (31.4)                         | 75 (34.1)                         | 86 (39.1)                         | 100 (45.5)                        | .013    |
| Intake of fish ≥3 times/d, No. (%)                             | 61 (27.7)                         | 78 (35.5)                         | 93 (42.5)                         | 96 (43.8)                         | .001    |
| Intake of fish oil supplement, No. (%)                         | 57 (25.9)                         | 50 (22.7)                         | 75 (34.1)                         | 69 (31.4)                         | .035    |
| Physical activity, d/wk, mean (SD)                             | 3.6 (2.8)                         | 5.1 (2.3)                         | 5.3 (2.1)                         | 5.7 (1.8)                         | <.001   |
| Participation in phase two cardiac rehabilitation <sup>e</sup> | 110 (50.2)                        | 119 (54.1)                        | 144 (65.5)                        | 142 (64.8)                        | .001    |

Abbreviations: MRC, Medical Research Council; ACE, angiotensin converting enzyme; AT, angiotensin; HADS-A/D, Hospital Anxiety and Depression Scale-Anxiety/Depression; MCS, Mental Component Summary.

<sup>a</sup>1st quartile had the lowest MCS score; 4<sup>th</sup> quartile had the highest MCS score.

<sup>b</sup>Totals may not sum to their respective totals due to missing data. No variable had more than 3.3% missing data.

<sup>c</sup>Norm-based scoring (1998 U.S. population) using weights derived from confirmatory factor analysis.

<sup>d</sup>Information collected the year before MI (in 2008). <sup>e</sup>Information collected three months after MI. <sup>f</sup>Information collected at the time of MI.

<sup>g</sup>Redeemed prescription for at least two classes of antihypertensive drugs between MI and 180 days before.

<sup>h</sup>Redeemed prescription for antidepressants between MI and 180 days before.

Figure 1 | Kaplan-Meier curves by quartiles of mental health status (Mental Component Summary score from the Short-Form 12 version 2)

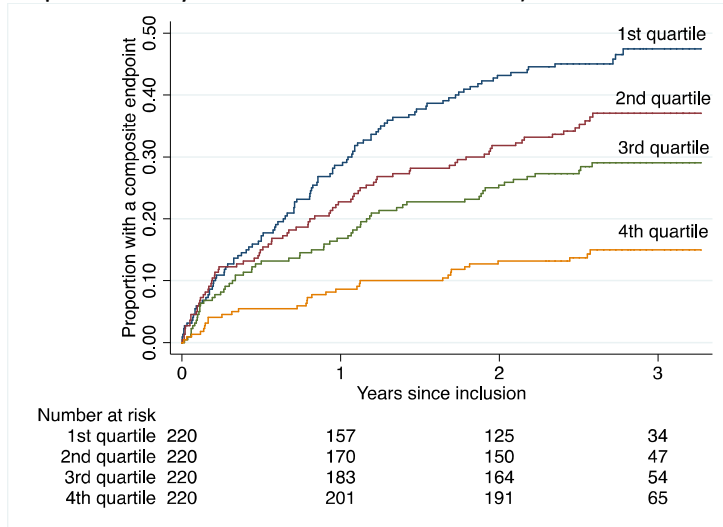

Table 2 | Association between mental health status (Mental Component Summary score from the Short-Form 12 version 2) and subsequent cardiovascular events or death, with sequential adjustment for potential confounders

| Adjusted variables <sup>a</sup>                | Hazard ratio (95% confidence interval)              |                                                    |                                                    |                                                    |
|------------------------------------------------|-----------------------------------------------------|----------------------------------------------------|----------------------------------------------------|----------------------------------------------------|
|                                                | 1 <sup>st</sup> Quartile MCS (102/220) <sup>b</sup> | 2 <sup>nd</sup> Quartile MCS (80/220) <sup>b</sup> | 3 <sup>rd</sup> Quartile MCS (63/220) <sup>b</sup> | 4 <sup>th</sup> Quartile MCS (32/220) <sup>b</sup> |
| Age                                            | 3.53 (2.36 to 5.27)                                 | 2.67 (1.77 to 4.03)                                | 2.09 (1.36 to 3.19)                                | 1 (reference)                                      |
| Socio-demographic characteristics <sup>c</sup> | 3.56 (2.35 to 5.38)                                 | 2.57 (1.69 to 3.92)                                | 2.06 (1.34 to 3.16)                                | 1 (reference)                                      |
| MRC dyspnea score ≥3                           | 2.74 (1.76 to 4.26)                                 | 2.30 (1.50 to 3.53)                                | 1.96 (1.27 to 3.00)                                | 1 (reference)                                      |
| Comorbidity <sup>d</sup>                       | 2.65 (1.70 to 4.13)                                 | 2.29 (1.50 to 3.51)                                | 1.99 (1.29 to 3.05)                                | 1 (reference)                                      |
| Secondary prophylactic medication              | 2.77 (1.78 to 4.31)                                 | 2.32 (1.51 to 3.56)                                | 1.95 (1.27 to 2.99)                                | 1 (reference)                                      |
| Smoking status                                 | 2.76 (1.76 to 4.31)                                 | 2.31 (1.51 to 3.56)                                | 1.96 (1.27 to 3.01)                                | 1 (reference)                                      |
| Physical activity                              | 2.47 (1.56 to 3.91)                                 | 2.25 (1.47 to 3.46)                                | 1.89 (1.23 to 2.91)                                | 1 (reference)                                      |
| HADS-A/D score ≥8                              | 2.26 (1.37 to 3.73)                                 | 2.15 (1.38 to 3.35)                                | 1.87 (1.21 to 2.88)                                | 1 (reference)                                      |

Abbreviations: MCS, Mental Component Summary; HADS-A/D, Hospital Anxiety and Depression Scale-Anxiety/Depression; MRC, Medical Research Council.

<sup>a</sup> Each model includes the variables from the preceding row so that the final model includes all the variables listed in this table.

<sup>b</sup> No. of outcomes/no. of persons in quartile.

<sup>c</sup> Sex, cohabitation status, education, labour market status. <sup>d</sup> History of stroke, diabetes mellitus, or heart failure.

Table 3 | Association between mental health status item scores (continuous; per one point lower item score) and subsequent cardiovascular events or death, with sequential adjustment for potential confounders and mediators

| Adjusted variables <sup>a</sup>                | Hazard ratio (95% confidence interval) |                     |                     |                     |                     |                     |
|------------------------------------------------|----------------------------------------|---------------------|---------------------|---------------------|---------------------|---------------------|
|                                                | Vitality                               | Role-Emotional 1    | Role-Emotional 2    | Social Functioning  | Mental Health 1     | Mental Health 2     |
| Age                                            | 1.41 (1.27 to 1.56)                    | 1.29 (1.18 to 1.41) | 1.26 (1.15 to 1.37) | 1.23 (1.12 to 1.35) | 1.31 (1.18 to 1.46) | 1.21 (1.09 to 1.35) |
| Socio-demographic characteristics <sup>b</sup> | 1.41 (1.26 to 1.57)                    | 1.31 (1.19 to 1.43) | 1.28 (1.17 to 1.41) | 1.21 (1.10 to 1.34) | 1.33 (1.19 to 1.48) | 1.21 (1.08 to 1.36) |
| MRC dyspnea score ≥3                           | 1.30 (1.16 to 1.47)                    | 1.21 (1.10 to 1.34) | 1.18 (1.07 to 1.31) | 1.12 (1.01 to 1.24) | 1.24 (1.11 to 1.40) | 1.11 (0.98 to 1.25) |
| Comorbidity <sup>c</sup>                       | 1.28 (1.14 to 1.44)                    | 1.21 (1.09 to 1.33) | 1.16 (1.05 to 1.28) | 1.10 (0.99 to 1.22) | 1.25 (1.11 to 1.40) | 1.11 (0.98 to 1.25) |
| Secondary prophylactic medication              | 1.31 (1.17 to 1.48)                    | 1.22 (1.11 to 1.35) | 1.18 (1.07 to 1.31) | 1.12 (1.01 to 1.24) | 1.24 (1.11 to 1.40) | 1.11 (0.98 to 1.25) |
| Smoking status                                 | 1.31 (1.17 to 1.48)                    | 1.22 (1.10 to 1.34) | 1.18 (1.06 to 1.30) | 1.12 (1.00 to 1.24) | 1.25 (1.11 to 1.41) | 1.11 (0.98 to 1.25) |
| Physical activity                              | 1.27 (1.13 to 1.44)                    | 1.18 (1.07 to 1.31) | 1.14 (1.03 to 1.27) | 1.08 (0.97 to 1.21) | 1.22 (1.09 to 1.38) | 1.07 (0.95 to 1.21) |
| HADS-A/D score ≥8                              | 1.24 (1.09 to 1.42)                    | 1.16 (1.04 to 1.29) | 1.11 (0.99 to 1.24) | 1.03 (0.91 to 1.16) | 1.19 (1.04 to 1.35) | 1.00 (0.87 to 1.16) |

Abbreviations: HADS-A/D, Hospital Anxiety and Depression Scale-Anxiety/Depression. MRC, Medical Research Council.

<sup>a</sup> Each model includes the variables from the preceding row so that the final model includes all the variables listed in this table.

<sup>b</sup> Sex, cohabitation status, education, labour market status. <sup>c</sup> History of stroke, diabetes mellitus, or heart failure.

Figure 2 | Association between baseline mental health status (median cut) and subsequent cardiovascular events or death for patients with myocardial infarction and specific characteristics

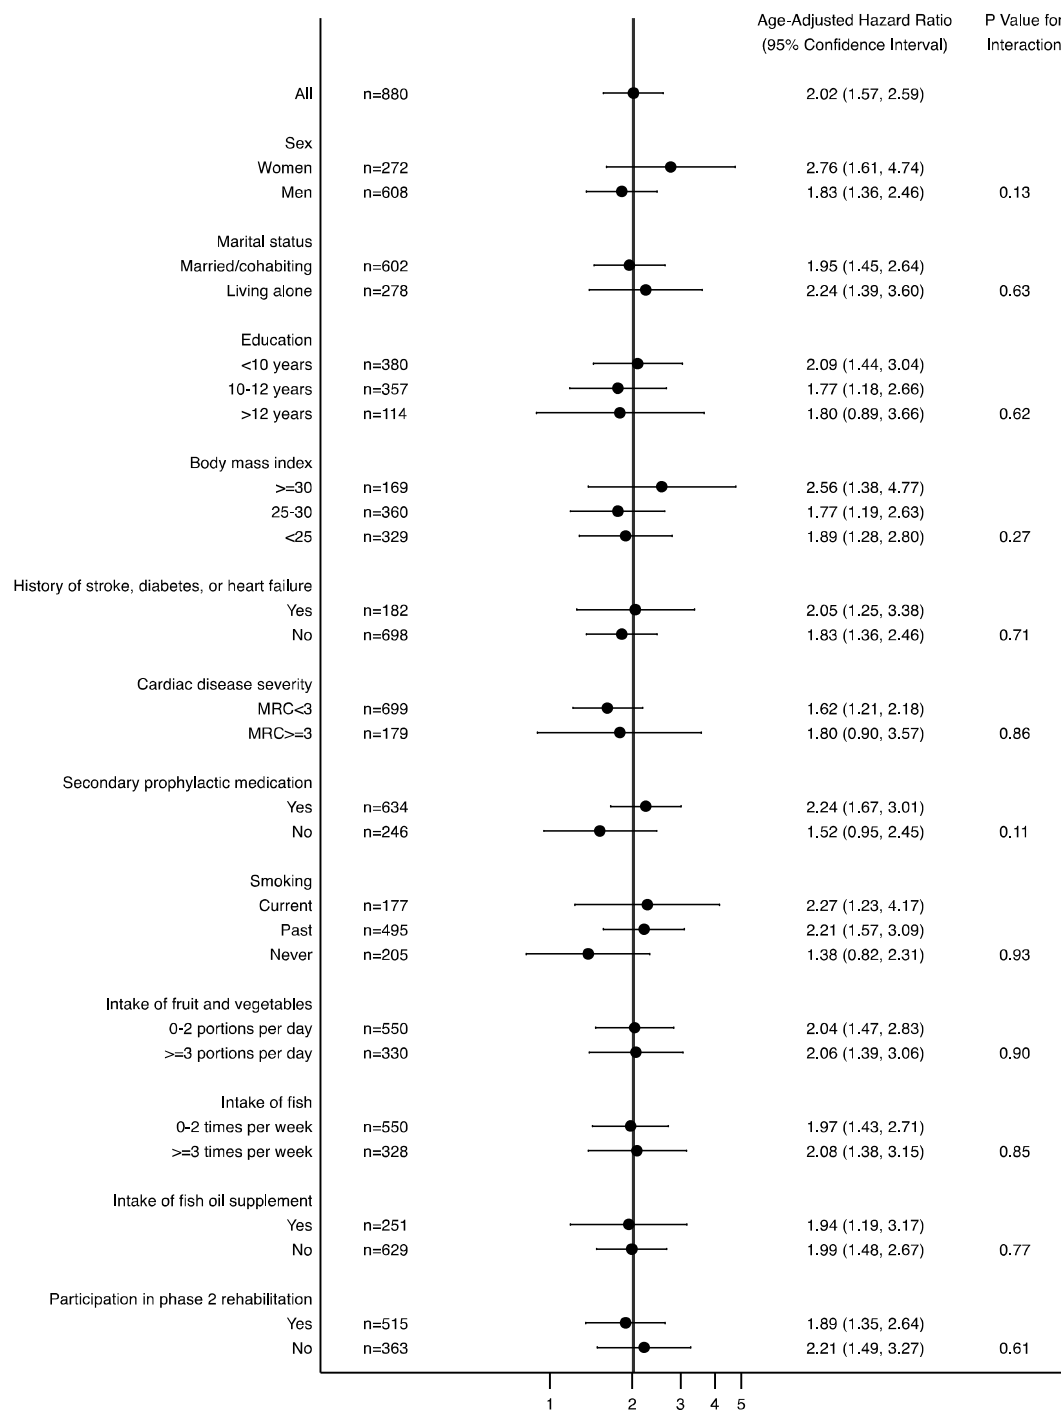

## WEB EXTRA SUPPLEMENT

Table A | Comparison of participants and non-participants

| Variable                                                | Participants<br>(n=880) | Non-participants<br>(n=408) | P<br>Value |
|---------------------------------------------------------|-------------------------|-----------------------------|------------|
| Socio-demographic characteristics                       |                         |                             |            |
| Age, y, mean (SD)                                       | 66.8 (11.7)             | 72.1 (14.7)                 | <.001      |
| Male sex, No. (%)                                       | 608 (69.1)              | 226 (55.4)                  | <.001      |
| Cohabitation status, living alone, No. (%) <sup>a</sup> | 278 (31.6)              | 230 (56.4)                  | <.001      |
| Education, No. (%) <sup>a</sup>                         |                         |                             |            |
| <10 years                                               | 380 (44.7)              | 206 (58.2)                  |            |
| 10-12 years                                             | 357 (42.0)              | 112 (31.6)                  |            |
| >12 years                                               | 114 (13.4)              | 36 (10.2)                   | <.001      |
| Labour market status, No. (%) <sup>a</sup>              |                         |                             |            |
| Working                                                 | 322 (36.6)              | 75 (18.4)                   |            |
| Pension                                                 | 471 (53.5)              | 283 (69.4)                  |            |
| Out of the work force                                   | 87 (9.9)                | 50 (12.3)                   | <.001      |
| Comorbid conditions, No. (%) <sup>b</sup>               |                         |                             |            |
| Stroke                                                  | 49 (5.6)                | 45 (11.0)                   | <.001      |
| Revascularization                                       | 80 (9.1)                | 35 (8.6)                    | .764       |
| Congestive heart failure                                | 28 (3.2)                | 45 (11.0)                   | <.001      |
| Diabetes mellitus                                       | 134 (15.2)              | 101 (24.8)                  | <.001      |
| Depression <sup>c</sup>                                 | 85 (9.7)                | 93 (22.8)                   | <.001      |

<sup>a</sup>Information collected the year before MI (in 2008).<sup>b</sup>Information collected at the time of MI.

Table B | Association between mental health status (Mental Component Summary score from the Short-Form 12 version 2; traditional scoring method) and subsequent cardiovascular events or death, with sequential adjustment for potential confounders

| Adjusted variables <sup>a</sup>                | Hazard ratio (95% confidence interval)                |                                                       |                                                       |                                                       |
|------------------------------------------------|-------------------------------------------------------|-------------------------------------------------------|-------------------------------------------------------|-------------------------------------------------------|
|                                                | 1 <sup>st</sup> quartile MCS<br>(96/220) <sup>b</sup> | 2 <sup>nd</sup> quartile MCS<br>(70/220) <sup>b</sup> | 3 <sup>rd</sup> quartile MCS<br>(64/225) <sup>b</sup> | 4 <sup>th</sup> quartile MCS<br>(47/215) <sup>b</sup> |
| Age                                            | 2.40 (1.69 to 3.40)                                   | 1.60 (1.10 to 2.31)                                   | 1.40 (0.96 to 2.04)                                   | 1 (reference)                                         |
| Socio-demographic characteristics <sup>c</sup> | 2.50 (1.74 to 3.61)                                   | 1.62 (1.10 to 2.37)                                   | 1.43 (0.97 to 2.11)                                   | 1 (reference)                                         |
| MRC dyspnea score $\geq 3$                     | 1.94 (1.32 to 2.85)                                   | 1.49 (1.01 to 2.19)                                   | 1.33 (0.90 to 1.97)                                   | 1 (reference)                                         |
| Comorbidity <sup>d</sup>                       | 1.92 (1.30 to 2.83)                                   | 1.52 (1.03 to 2.23)                                   | 1.40 (0.95 to 2.07)                                   | 1 (reference)                                         |
| Secondary prophylactic medication              | 1.94 (1.32 to 2.86)                                   | 1.49 (1.01 to 2.19)                                   | 1.34 (0.91 to 1.98)                                   | 1 (reference)                                         |
| Smoking status                                 | 1.93 (1.31 to 2.84)                                   | 1.45 (0.99 to 2.14)                                   | 1.34 (0.90 to 1.98)                                   | 1 (reference)                                         |
| Physical activity                              | 1.76 (1.19 to 2.62)                                   | 1.41 (0.96 to 2.08)                                   | 1.32 (0.89 to 1.95)                                   | 1 (reference)                                         |
| HADS-A/D score $\geq 8$                        | 1.57 (1.01 to 2.45)                                   | 1.33 (0.89 to 1.99)                                   | 1.30 (0.88 to 1.93)                                   | 1 (reference)                                         |

Abbreviations: MCS, Mental Component Summary; HADS-A/D, Hospital Anxiety and Depression Scale-Anxiety/Depression. MRC, Medical Research Council.

<sup>a</sup> Each model includes the variables from the preceding row so that the final model includes all the variables listed in this table.<sup>b</sup> No. of outcomes/no. of persons in quartile.<sup>c</sup> Sex, cohabitation status, education, labour market status. <sup>d</sup> History of stroke, diabetes mellitus, or heart failure.

Table C | Stratified analysis for those without depression and anxiety, n=622. Association between mental health status (Mental Component Summary score from the Short-Form 12 version 2) and subsequent cardiovascular events or death, with sequential adjustment for potential confounders and mediators

| Adjusted variables <sup>a</sup>                | Hazard ratio (95% confidence interval)                |                                                       |                                                       |                                                       |
|------------------------------------------------|-------------------------------------------------------|-------------------------------------------------------|-------------------------------------------------------|-------------------------------------------------------|
|                                                | 1 <sup>st</sup> quartile MCS<br>(63/155) <sup>b</sup> | 2 <sup>nd</sup> quartile MCS<br>(48/156) <sup>b</sup> | 3 <sup>rd</sup> quartile MCS<br>(38/154) <sup>b</sup> | 4 <sup>th</sup> quartile MCS<br>(19/157) <sup>b</sup> |
| Age                                            | 3.39 (2.01 to 5.73)                                   | 2.63 (1.55 to 4.49)                                   | 2.20 (1.27 to 3.81)                                   | 1 (reference)                                         |
| Socio-demographic characteristics <sup>c</sup> | 3.49 (2.04 to 5.98)                                   | 2.59 (1.51 to 4.44)                                   | 2.05 (1.17 to 3.56)                                   | 1 (reference)                                         |
| MRC dyspnea score $\geq 3$                     | 3.15 (1.81 to 5.48)                                   | 2.45 (1.42 to 4.22)                                   | 2.00 (1.15 to 3.48)                                   | 1 (reference)                                         |
| Comorbidity <sup>d</sup>                       | 3.03 (1.74 to 5.29)                                   | 2.44 (1.42 to 4.19)                                   | 1.91 (1.10 to 3.34)                                   | 1 (reference)                                         |
| Secondary prophylactic medication              | 3.22 (1.85 to 5.59)                                   | 2.44 (1.42 to 4.20)                                   | 2.02 (1.16 to 3.52)                                   | 1 (reference)                                         |
| Smoking status                                 | 3.13 (1.79 to 5.46)                                   | 2.52 (1.46 to 4.33)                                   | 1.99 (1.14 to 3.46)                                   | 1 (reference)                                         |
| Physical activity                              | 3.03 (1.72 to 5.34)                                   | 2.49 (1.44 to 4.29)                                   | 1.97 (1.13 to 3.43)                                   | 1 (reference)                                         |

Abbreviations: MCS, Mental Component Summary; MRC, Medical Research Council.

<sup>a</sup> Each model includes the variables from the preceding row so that the final model includes all the variables listed in this table.<sup>b</sup> No. of outcomes/no. of persons in quartile.<sup>c</sup> Sex, cohabitation status, education, labour market status. <sup>d</sup> History of stroke, diabetes mellitus, or heart failure.

**eFigure 1 | The 6 mental health status items from the Short-Form 12 version 2**

4. During the past 4 weeks, how much of the time have you had any of the following problems with your work or other regular daily activities as a result of any emotional problems (such as feeling depressed or anxious)?

- a. Accomplished less than you would like.
- b. Did work or other activities less carefully than usual.

6. These questions are about how you feel and how things have been with you during the past 4 weeks. For each question, please give the one answer that comes closest to the way you have been feeling. How much of the time during the past 4 weeks...

- a. Have you felt calm and peaceful?
- b. Did you have a lot of energy?
- c. Have you felt downhearted and depressed?

7. During the past 4 weeks, how much of the time has your physical health or emotional problems interfered with your social activities (like visiting friends, relatives, etc.)?

The options for all of the items are:

All of the time, most of the time, some of the time, a little of the time, none of the time.

*4a: Role-Emotional item 1.*

*4b: Role-Emotional item 2.*

*6a: Mental Health item 1.*

*6b: Vitality.*

*6c: Mental Health item 2.*

*7: Social Functioning.*

- 1  
2  
3  
4  
5  
6  
7  
8  
9  
10  
11  
12  
13  
14  
15  
16  
17  
18  
19  
20  
21  
22  
23  
24  
25  
26  
27  
28  
29  
30  
31  
32  
33  
34  
35  
36  
37  
38  
39  
40  
41  
42  
43  
44  
45  
46  
47  
48  
49  
50  
51  
52  
53  
54  
55  
56  
57  
58  
59  
60
1. Thombs BD, Bass EB, Ford DE, Stewart KJ, Tsilidis KK, Patel U, et al. Prevalence of depression in survivors of acute myocardial infarction - Review of the evidence. *Journal of General Internal Medicine* 2006; JAN 2006;21(1).
2. Roest AM, Martens EJ, Denollet J, de Jonge P. Prognostic Association of Anxiety Post Myocardial Infarction With Mortality and New Cardiac Events: A Meta-Analysis. *Psychosom Med* 2010; JUL-AUG 2010;72(6).
3. Crilley JG, Farrer M. Impact of first myocardial infarction on self-perceived health status. *QJM* 2001; Jan;94(1):13-8.
4. Meijer A, Conradi HJ, Bos EH, Thombs BD, van Melle KP, de Jonge P. Prognostic association of depression following myocardial infarction with mortality and cardiovascular events: a meta-analysis of 25 years of research. *Gen Hosp Psychiatry* 2011; MAY-JUN;33(3):203-16.
5. Piotrowicz K, Noyes K, Lyness JM, McNitt S, Andrews ML, Dick A, et al. Physical functioning and mental well-being in association with health outcome in patients enrolled in the Multicenter Automatic Defibrillator Implantation Trial II. *Eur Heart J* 2007; Mar;28(5):601-7.
6. Nelson EC, Ferreira PL, Cleary PD, Gustafson D, Wasson JH. Do patients' health status reports predict future hospital stays for patients with an acute myocardial infarction?. *Fam Pract Res J* 1994; Jun;14(2):119-26.
7. Norekval TM, Fridlund B, Rokne B, Segadal L, Wentzel-Larsen T, Nordrehaug JE. Patient-reported outcomes as predictors of 10-year survival in women after acute myocardial infarction. *Health and Quality of Life Outcomes* 2010; NOV 25 2010;8:140.
8. Lim LLY, Johnson NA, O'Connell RL, Heller RF. Quality of life and later adverse health outcomes in patients with suspected heart attack. *Aust N Z J Public Health* 1998; AUG 1998;22(5).
9. Larsen KK, Vestergaard M, Sondergaard J, Christensen B. Rehabilitation status three months after first-time myocardial infarction. *Scand J Prim Health Care* 2011; Dec;29(4):210-5.



- 1  
2  
3  
4  
5  
6  
7  
8  
9  
10  
11  
12  
13  
14  
15  
16  
17  
18  
19  
20  
21  
22  
23  
24  
25  
26  
27  
28  
29  
30  
31  
32  
33  
34  
35  
36  
37  
38  
39  
40  
41  
42  
43  
44  
45  
46  
47  
48  
49  
50  
51  
52  
53  
54  
55  
56  
57  
58  
59  
60
10. Joensen AM, Jensen MK, Overvad K, Dethlefsen C, Schmidt E, Rasmussen L, et al. Predictive values of acute coronary syndrome discharge diagnoses differed in the Danish National Patient Registry. *J Clin Epidemiol* 2009; FEB;62(2):188-94.
  11. Pedersen CB. The Danish Civil Registration System. *Scand J Public Health* 2011; Jul;39(7 Suppl):22-5.
  12. Kosinski M, Ware JE, Turner-Bowker DM, Gandek B. *User's manual for the SF-12v2 health survey : with a supplement documenting the SF-12® health survey*. Lincoln, RI: QualityMetric incorporated; 2007.
  13. Ware JE, Kosinski M, Keller SD. A 12-item short-form health survey - Construction of scales and preliminary tests of reliability and validity. *Med Care* 1996; MAR 1996;34(3).
  14. Gandek B, Ware JE, Aaronson NK, Apolone G, Bjorner JB, Brazier JE, et al. Cross-validation of item selection and scoring for the SF-12 Health Survey in nine countries: results from the IQOLA Project. International Quality of Life Assessment. *J Clin Epidemiol* 1998; Nov;51(11):1171-8.
  15. Fleishman JA, Selim AJ, Kazis LE. Deriving SF-12v2 physical and mental health summary scores: a comparison of different scoring algorithms. *Quality of Life Research* 2010; MAR 2010;19(2).
  16. Zigmond AS, Snaith RP. The Hospital Anxiety and Depression Scale. *Acta Psychiatr Scand* 1983; 1983;67(6).
  17. Johnston M, Pollard B, Hennessey P. Construct validation of the hospital anxiety and depression scale with clinical populations. *J Psychosom Res* 2000; JUN 2000;48(6).
  18. Martin C, Lewin R, Thompson D. A confirmatory factor analysis of the Hospital Anxiety and Depression Scale in coronary care patients following acute myocardial infarction. *Psychiatry Res* 2003; AUG 2003;120(1):85-94.
  19. Thombs BD, Magyar-Russell G, Bass EB, Stewart KJ, Tsilidis KK, Bush DE, et al. Performance characteristics of depression screening instruments in survivors of acute myocardial infarction: Review of the evidence. *Psychosomatics* 2007; JUN 2007;48(3).

- 1  
2  
3  
4  
5  
6  
7  
8  
9  
10  
11  
12  
13  
14  
15  
16  
17  
18  
19  
20  
21  
22  
23  
24  
25  
26  
27  
28  
29  
30  
31  
32  
33  
34  
35  
36  
37  
38  
39  
40  
41  
42  
43  
44  
45  
46  
47  
48  
49  
50  
51  
52  
53  
54  
55  
56  
57  
58  
59  
60
20. Bjelland I, Dahl AA, Haug TT, Neckelmann D. The validity of the Hospital Anxiety and Depression Scale. An updated literature review. *J Psychosom Res* 2002; Feb;52(2):69-77.
21. Frasure-Smith N, Lesperance F. Depression and anxiety as predictors of 2-year cardiac events in patients with stable coronary artery disease. *Arch Gen Psychiatry* 2008; Jan;65(1):62-71.
22. Andersen TF, Madsen M, Jorgensen J, Mellemkjoer L, Olsen JH. The Danish National Hospital Register. A valuable source of data for modern health sciences. *Dan Med Bull* 1999; Jun;46(3):263-8.
23. Carstensen B, Kristensen JK, Marcussen MM, Borch-Johnsen K. The National Diabetes Register. *Scand J Public Health* 2011; JUL;39:58-61.
24. Johannesdottir SA, Horvath-Puho E, Ehrenstein V, Schmidt M, Pedersen L, Sorensen HT. Existing data sources for clinical epidemiology: The Danish National Database of Reimbursed Prescriptions. *Clin Epidemiol* 2012;4:303-13.
25. Fletcher C. Standardized questionnaires on respiratory symptoms. A statement prepared for, and approved by, the Medical Research Council's Committee on the aetiology of chronic bronchitis. *Br Med J* 1960;2:1665.
26. Vestbo J, Knudsen KM, Rasmussen FV. Should we Continue using Questionnaires on Breathlessness in Epidemiologic Surveys. *Am Rev Respir Dis* 1988; MAY 1988;137(5).
27. Ades PA. Cardiac rehabilitation and secondary prevention of coronary heart disease. *N Engl J Med* 2001; Sep 20;345(12):892-902.
28. Giannuzzi P, Saner H, Bjornstad H, Fioretti P, Mendes M, Cohen-Solal A, et al. Secondary prevention through cardiac rehabilitation: position paper of the Working Group on Cardiac Rehabilitation and Exercise Physiology of the European Society of Cardiology. *Eur Heart J* 2003; Jul;24(13):1273-8.
29. Statistics Denmark. *IDA: An integrated database for labour market research: Main report*. Copenhagen, Denmark: Statistics Denmark; 1991.

- 1  
2  
3  
4  
5  
6  
7  
8  
9  
10  
11  
12  
13  
14  
15  
16  
17  
18  
19  
20  
21  
22  
23  
24  
25  
26  
27  
28  
29  
30  
31  
32  
33  
34  
35  
36  
37  
38  
39  
40  
41  
42  
43  
44  
45  
46  
47  
48  
49  
50  
51  
52  
53  
54  
55  
56  
57  
58  
59  
60
30. Wetherill G, Duncombe P, Kenward M. *Regression Analysis with Applications*. London: Capman and Hall; 1986.
31. Barnett K, Mercer SW, Norbury M, Watt G, Wyke S, Guthrie B. Epidemiology of multimorbidity and implications for health care, research, and medical education: a cross-sectional study. *Lancet* 2012; Jul 7;380(9836):37-43.
32. Farivar SS, Cunningham WE, Hays RD. Correlated physical and mental health summary scores for the SF-36 and SF-12 Health Survey, V.I. *Health and Quality of Life Outcomes* 2007; SEP 7 2007;5:54.
33. Pelle AJ, Kupper N, Mols F, de Jonge P. What is the use? Application of the short form (SF) questionnaires for the evaluation of treatment effects. *Qual Life Res* 2012; Sep 14;.
34. Hann M, Reeves D. The SF-36 scales are not accurately summarised by independent physical and mental component scores. *Quality of Life Research* 2008; APR 2008;17(3).
35. Hoang U, Stewart R, Goldacre MJ. Mortality after hospital discharge for people with schizophrenia or bipolar disorder: retrospective study of linked English hospital episode statistics, 1999-2006. *BMJ* 2011; Sep 13;343:d5422.
36. Whooley MA, de Jonge P, Vittinghoff E, Otte C, Moos R, Carney RM, et al. Depressive Symptoms, Health Behaviors, and Risk of Cardiovascular Events in Patients With Coronary Heart Disease. *Jama-Journal of the American Medical Association* 2008; NOV 26 2008;300(20).
37. Rumsfeld JS, Ho PM. Depression and cardiovascular disease: a call for recognition. *Circulation* 2005; Jan 25;111(3):250-3.
38. Murphy AW, Cupples ME, Smith SM, Byrne M, Byrne MC, Newell J, et al. Effect of tailored practice and patient care plans on secondary prevention of heart disease in general practice: cluster randomised controlled trial. *BMJ* 2009; Oct 29;339:b4220.

1  
2  
3  
4  
5  
6  
7  
8  
9  
10  
11  
12  
13  
14  
15  
16  
17  
18  
19  
20  
21  
22  
23  
24  
25  
26  
27  
28  
29  
30  
31  
32  
33  
34  
35  
36  
37  
38  
39  
40  
41  
42  
43  
44  
45  
46  
47  
48  
49  
50  
51  
52  
53  
54  
55  
56  
57  
58  
59  
60

## **Mental health status and risk of new cardiovascular events or death in patients with myocardial infarction: a population-based cohort study**

Tine Jepsen Nielsen, Mogens Vestergaard, Bo Christensen, Kaj Sparle Christensen, Karen Kjær Larsen

Section for General Medical Practice, Aarhus University, Bartholins Allé 2, 8000 Aarhus C, Denmark

Tine Jepsen Nielsen  
Junior research fellow

Section for General Medical Practice and Research Unit for General Practice, Aarhus University, Bartholins Allé 2, 8000 Aarhus C, Denmark

Mogens Vestergaard  
Professor

Section for General Medical Practice, Aarhus University, Bartholins Allé 2, 8000 Aarhus C, Denmark

Bo Christensen  
Professor

Research Unit for General Practice, Aarhus University, Bartholins Allé 2, 8000 Aarhus C, Denmark

Kaj Sparle Christensen  
Senior researcher

Section for General Medical Practice and Research Unit for General Practice, Aarhus University, Bartholins Allé 2, 8000 Aarhus C, Denmark

Karen Kjær Larsen  
PhD fellow

Correspondence to: TJ Nielsen. E-mail: [tjn@folkesundhed.au.dk](mailto:tjn@folkesundhed.au.dk)

## ARTICLE SUMMARY

### Article focus

- Myocardial infarction (MI) is often followed by mental health problems such as depression, anxiety, and low mental health status.
- Mounting evidence indicates that depression and anxiety after MI increase the risk of adverse long-term outcome. No previous studies have examined the association between mental health status after MI and outcome, independent of depression and anxiety.
- This study examines the association between mental health status after first-time MI and new cardiovascular events or death, when taking into account depression and anxiety as well as clinical, socio-demographic, and behavioural risk factors.

### Key messages

- During three years after the MI, patients with the lowest mental health status had **an almost** 50% risk of new cardiovascular events or death.
- Low mental health status after MI was a strong predictor of new cardiovascular events or death, independent of depression, anxiety and clinical, socio-demographic, and behavioural risk factors.

### Strengths and limitations of this study

- Major strengths of this study are its population-based nature and the homogenous study population. The response rate was **reasonably** high, and information on outcome was collected without loss to follow-up.
- We were able to take into account important mediators such as depression, anxiety, and potential behavioural mediators such as physical activity. However, we cannot rule out the possibility of residual confounding.

Review only

## Abstract

**Objective** To examine the association between mental health status after first-time myocardial infarction (MI) and new cardiovascular events or death, taking into account depression and anxiety as well as clinical, socio-demographic, and behavioural risk factors.

**Design** Population-based cohort study based on questionnaires and nationwide registries. Mental health status was assessed three months after the MI using the Mental Component Summary score from the Short-Form 12 version 2.

**Setting** Central Denmark Region.

**Participants** All patients hospitalised with first-time MI from 1 January 2009 through 31 December 2009 (n=880). The participants were categorised in quartiles according to level of mental health status (1<sup>st</sup> quartile=lowest mental health status).

**Main outcome measures** Composite endpoint of new cardiovascular events (MI, heart failure, stroke/transient ischaemic attack) and all-cause mortality.

**Results** During 1,940 person-years of follow-up, 277 persons experienced a new cardiovascular event or died. The cumulative incidence following three years after the MI increased consistently with decreasing mental health status and was 15.0% (95% confidence interval 10.8% to 20.5%) for persons in the fourth quartile 29.1% (23.5% to 35.6%) in the third quartile, 37.0% (30.9% to 43.9%) in the second quartile, and 47.5% (40.9% to 54.5%) in the first quartile. The hazard ratios (HR) were high, even after adjustments for age, socio-demographic characteristics, cardiac disease severity, comorbidity, secondary prophylactic medication, smoking status, physical activity, depression, and anxiety (HR<sub>3<sup>rd</sup> quartile</sub> 1.90 (95% confidence interval 1.23 to 2.93), HR<sub>2<sup>nd</sup> quartile</sub> 2.14 (1.37 to 3.33), HR<sub>1<sup>st</sup> quartile</sub> 2.23 (1.35 to 3.68) when using the fourth quartile as reference).

**Conclusions** Low mental health status following first-time MI was independently associated with an increased risk of new cardiovascular events or death. Further research is needed to disentangle the pathways that link mental health status following MI to prognosis and to identify interventions that can improve both mental health status and prognosis.

## INTRODUCTION

Myocardial infarction (MI) is a severe life event followed by an increased risk of mental health problems such as depression,<sup>1</sup> anxiety,<sup>2</sup> and low mental health status.<sup>3</sup> Several studies have shown that depression<sup>4</sup> and anxiety<sup>2</sup> after MI is associated with a higher risk of cardiovascular events and death, but much less is known about the impact of broader measures of mental health. Mental health status is a generic and broad measure of mental health, which may be useful as a tool to quantify important prognostic aspects of mental health not captured by the more disease-specific measures of depression and anxiety. Four studies<sup>5-8</sup> have investigated the association between mental health status following MI and prognosis. All these have found that low mental health status was significantly associated with increased risk of adverse outcome, independent of clinical risk factors. However, since none of the former studies adjusted for depression or anxiety, it remains unknown whether mental health status in itself adds unique knowledge about the prognosis.

Our aim was to examine the association between mental health status and new cardiovascular events or death in patients with first-time MI when taking into account depression, anxiety, and clinical, socio-demographic, and behavioural risk factors.

## METHODS

We conducted a population-based cohort study comprising people in the Central Denmark Region (1,250,000 inhabitants) with a first-time MI based on data from nationwide registers and questionnaires.

### Participants

We consecutively invited all patients discharged from hospital with a first-time MI from 1 January 2009 to 31 December 2009. The establishment of the cohort is described in detail elsewhere.<sup>9</sup> Data on patients discharged with MI (in accordance with the International Classification of Diseases (ICD-10) code I21)<sup>10</sup> were received from the Danish National Patient Register on a monthly basis. Patients who had been discharged with MI between 1994 and 2008 were excluded to identify first-time cases. Information on name, address, and vital status was obtained from the Civil Registration System,<sup>11</sup> which also provided the unique personal identification number used to link data between the registers and questionnaires.

## Data collection

A pilot-tested hard-copy questionnaire was sent to all participants 12 to 14 weeks after their discharge from hospital, and non-responders received two reminders.<sup>9</sup> The study was approved by the Danish Data Protection Agency (J.nr. 2009-41-3018), the Scientific Research Evaluation Committee of the Danish Academy of General Practitioners (ref. no. 03-2009), and written informed consent was obtained from all participants.

## Mental health status

Mental health status was measured using the Mental Component Summary (MCS) score from the validated Danish version of the Short-Form 12 version 2 Health Survey (SF-12).<sup>12-14</sup> The SF-12 consists of 12 items, the MCS score comprises mainly of the six mental items ('Vitality', 'Role-Emotional' (2 items), 'Social Function', and 'Mental Health' (2 items)), but the six physical items are also included in the computation.<sup>12</sup> The SF-12 scores were calculated following the norm-based scoring algorithm<sup>12</sup> using weights derived from confirmatory factor analysis.<sup>15</sup> The MCS score is thus linearly transformed in a way that allows comparison with the mean score (50) and the standard deviation (SD) (10) in the general US population in 1998.<sup>12</sup> The MCS has demonstrated good construct validity.<sup>15</sup> The wording of the mental health status items can be found in the supplemental material (**eFigure 1**).

## Depression and anxiety

We assessed depression and anxiety symptoms using the Hospital Anxiety and Depression Scale (HADS).<sup>16</sup> The participants were categorised as having anxiety or depression if they had a score of  $\geq 8$  on the HADS-A scale or the HADS-D scale. The HADS was designed to be valid in clinical populations with symptoms of physical disease and hence leaves out items that may be endorsed by physical rather than mental states.<sup>16, 17</sup> The HADS has formerly been validated in MI patients<sup>18, 19</sup> and has proven to have satisfactory reliability (HADS-A and HADS-D Cronbach's  $\alpha \approx 0.80$ ).<sup>18, 20</sup> Among MI patients, a HADS-D $\geq 8$  identified possible cases of depression with a sensitivity of 65% and a specificity of 90% (compared with a diagnosis of depression based on a Structured Clinical Interview for DSM-IV).<sup>19</sup> Among acute coronary syndrome patients, a HADS-A $\geq 8$  identified possible cases of anxiety with a sensitivity of 91% and a specificity of 61% (compared with a diagnosis of generalised anxiety disorder based on a Structured Clinical Interview for DSM-IV).<sup>21</sup>



### **Co-morbidity and cardiac disease severity**

Information on co-morbidity was retrieved from the Danish National Patient Register,<sup>22</sup> the Danish National Diabetes Register,<sup>23</sup> and the prescription database covering the entire Central Denmark Region.<sup>24</sup> The Danish National Patient Register provided information on stroke (ICD-10: I61, I63, I64), transient cerebral ischemic attack (ICD-10: DG45, DG46), heart failure (ICD-10: I11.0, I13.0, I13.2, I42.0, I42.6, I42.7, I42.9, I50.0, I50.1, I50.9), and revascularization (ICD-10: KFN, KFW) from 1994 to 2008. The Danish National Diabetes Register provided information on diabetes mellitus from 1990 to 2008 according to an algorithm developed on the basis of information from four nationwide registers.<sup>23</sup> The prescription database provided information on all reimbursed drugs according to the Anatomical Therapeutic Chemical Classification System (ATC), dispensing dates, and the total number of tablets dispensed. Participants were categorised with hypertension if they had redeemed prescriptions for at least two classes of antihypertensive drugs (ATC: C02A-D, C02L, C03A-B, C03D-E, C03X, C04, C05, C07, C08, C09) 0 to 180 days before the index MI. Participants were categorised with depression before MI if they had redeemed a prescription for an antidepressant (ATC: N06A) 0 to 180 days before the index MI. Participants were categorised with severe mental disorder if they had redeemed a prescription for antipsychotics (ATC: N05A) 0 to 180 days before the index MI.

Cardiac disease severity was measured by the British Medical Research Council (MRC) dyspnea score, a self-report instrument.<sup>25</sup> A score  $\geq 3$  has been shown to provide a simple and valid method for predicting overall mortality.<sup>26</sup>

### **Health behaviour, health care interventions, and socio-demographics**

Data on smoking, alcohol use, physical activity, intake of fruit and vegetables, intake of fish, intake of fish oil supplement, height, and weight (body mass index=weight [kg] per height [m<sup>2</sup>]) were self-reported and classified according to the general recommendations from the Danish National Board of Health.<sup>9</sup> To assess physical activity, we asked, "How many days per week are you generally physically active for at least 30 minutes per day? You may include any physical activity at work or in your spare time that makes your pulse rate increase". Response options were from zero days to every day per week. Physical activity was computed as a continuous variable (days/week).

We defined cardiac rehabilitation<sup>27, 28</sup> in the questionnaire and asked whether they had participated in hospital-based phase two cardiac rehabilitation. Those who responded "yes,

1  
2 and I took part" were classified as 'participants' those who responded "yes, but I didn't take  
3 part" or "no" were classified as 'non-participants'.<sup>9</sup>

4  
5 Drug prescription data were obtained from the prescription database.<sup>24</sup> Data on aspirin  
6 (ATC: B01AC06), clopidogrel (ATC: B01AC04), statins (ATC: C10AA),  $\beta$ -blockers (ATC: C07),  
7 ACE-inhibitors/angiotensin 2 receptor blockers (ATC: C09), furosemide (ATC: C03C),  
8 aldosterone antagonists (ATC: C03D), and antidepressants (ATC: N06A) were collected. We  
9 calculated whether the participant had tablets available on the day that we sent the  
10 questionnaire (the number of tablets on the last redeemed prescription before the  
11 questionnaire was sent  $\geq$  the number of days to the questionnaire was sent) and defined the  
12 participant as 'receiving treatment' if tablets were available. We defined the participant as  
13 'receiving secondary prophylactic medication' if the participant was receiving treatment with  
14 three or more of the following drugs: aspirin, clopidogrel, statins, and  $\beta$ -blockers. We defined  
15 the participant as 'receiving heart failure medication' if the participant was receiving  
16 treatment with furosemide or aldosterone antagonists.

17  
18 Data on age at MI and sex were obtained from the Civil Registration System.<sup>11</sup> Each  
19 participant's socio-demographic characteristics (cohabitation status, education, labour  
20 market status) from the year before MI (2008) were retrieved from the Danish Integrated  
21 Database for Labour Market Research.<sup>29</sup>

### 22 23 24 25 26 27 28 29 30 31 32 33 34 35 **Cardiovascular events and death**

36 Outcome events were measured as a composite endpoint comprising new cardiovascular  
37 events (MI, heart failure, stroke or transient ischaemic attack) and all-cause mortality.  
38 Information on outcomes was collected from baseline (the day we sent the questionnaire) to  
39 the last day of follow-up (31 July 2012). The Danish National Patient Register<sup>22</sup> provided  
40 information on cardiovascular events. Vital status (dead or alive) was obtained from the Civil  
41 Registration System.<sup>11</sup>

### 42 43 44 45 46 47 48 **Statistical analysis**

49 Neither natural thresholds nor clinically based thresholds are defined for the MCS score, so  
50 we divided the participants into quartiles according to their score (1<sup>st</sup> quartile had the lowest  
51 score; 4<sup>th</sup> quartile had the highest score). This categorisation was done to enhance clinical  
52 interpretability and to evaluate a possible dose response relationship.

53  
54  
55  
56  
57  
58  
59  
60 In order to address the potential risk of selection bias, we used antidepressant  
consumption as a proxy for depression and calculated hazard ratios (HRs) for the association

1  
2 between antidepressant consumption and new cardiovascular events or death for both  
3 participants and non-participants.

4  
5 The association between baseline characteristics and MCS score was assessed using  $\chi^2$   
6 statistics for categorical variables and analysis of variance for continuous variables, or  
7 Kruskal-Wallis tests when the conditions for analysis of variance were not fulfilled.  
8

9  
10 We calculated the event-free survival time as the time from three months after the MI  
11 (baseline evaluation of mental health status) to the first cardiovascular event or death. If no  
12 event or death occurred, the participant was censored on 31 July 2012. Two persons  
13 emigrated during the time of follow-up, and they were censored on the day of their  
14 emigration. Owing to the use of nationwide registers, we had complete follow-up of all  
15 participants.  
16  
17  
18  
19

20  
21 The unadjusted association between mental health status and new cardiovascular events  
22 or death was presented graphically with Kaplan-Meier curves. The cumulative incidence three  
23 years after the MI was estimated using the cumulative hazards function, and identical  
24 incidence was tested using the log-rank test.  
25  
26

27  
28 The risk of cardiovascular events or death associated with mental health status was  
29 compared using Cox proportional hazards regression. The covariates for the multivariate  
30 model (age, sex, cohabitation status, education, labour market status, cardiac disease severity,  
31 history of stroke, diabetes mellitus, heart failure, secondary prophylactic medication, smoking  
32 status, physical activity, depression, and anxiety) were chosen on the basis of previous  
33 studies. [To check for multicollinearity between depression/anxiety symptoms and mental  
34 health status we calculated the variance inflation factor which was 1.5. Values above 10  
35 indicate multicollinearity.](#)<sup>30</sup> We evaluated whether the HRs of mental health status following  
36 MI varied by subgroups by testing for interaction using Wald test in an age-adjusted model,  
37 and the results are presented in a forest plot. Too few outcome events were available to test  
38 for interaction in quartiles, so we tested it in a dichotomised (median cut) model. We excluded  
39 variables with less than five events in a subgroup.  
40  
41  
42  
43  
44  
45  
46  
47

48 Finally, we calculated HRs for the association between each of the mental health status  
49 items (continuous; per one-point lower item score) and outcome.  
50

51 No variable had more than 0.3% missing data, except body mass index (for which 2.5%  
52 data were missing) and education (for which 3.3% data were missing), and analyses were  
53 done on complete data only.  $P < 0.05$  was considered statistically significant.  
54  
55  
56  
57  
58  
59  
60

## RESULTS

### Participant characteristics

Among a total of 1,288 eligible patients with first-time MI, 880 (68.3%) completed the SF-12, and the mean MCS score was 44.9 (SD 11.5). Non-participants were more often women, older, had fewer socioeconomic resources, and more comorbid conditions than participants (Web Extra Supplement Table A). The estimates of the association between antidepressant consumption and new cardiovascular events or death in participants, HR 1.55 (95% confidence interval 1.12 to 2.14) and in non-participants, HR 1.46 (1.01 to 2.10), were similar. Compared to participants with higher mental health status, the participants with the lowest mental health status (1st quartile, table 1) were impaired in a range of variables; e.g. symptoms of depression and anxiety, cardiac disease severity, comorbidity, socioeconomic resources, and health behaviour.

### Cumulative incidence

A total of 277 outcomes (230 new cardiovascular events and 47 deaths) occurred during 1,940 person years of follow-up (median 2.6 years, SD 1.0). The Kaplan-Meier curves (figure 1) show that the unadjusted risk of a cardiovascular event or death increased with decreasing mental health status. During three years after the MI, the cumulative incidence of the composite endpoint was 47.5% (95% confidence interval 40.9% to 54.5%) for persons in the first, 37.0% (30.9% to 43.9%) in the second, 29.1% (23.5% to 35.6%) in the third, and 15.0% (10.8% to 20.5%) in the fourth quartile,  $P < 0.001$ .

### Association between mental health status and new cardiovascular events or death

The age-adjusted HRs for new cardiovascular events or death in post-MI patients increased with decreasing mental health status (HR<sub>3rd quartile</sub> 2.09 (95% confidence interval 1.36 to 3.19), HR<sub>2nd quartile</sub> 2.67 (1.77 to 4.03), HR<sub>1st quartile</sub> 3.53 (2.36 to 5.27), table 2). Additional adjustment for cardiac disease severity, physical activity, depression, and anxiety attenuated the association. In the fully adjusted model, the MI patients with the lowest mental health status had a more than two-fold higher risk of new cardiovascular events or death compared to the patients with the highest mental health status (table 2).

We found no statistically significant difference in the HRs between any subgroups of MI patients (figure 2).

### Exploratory analysis of the six mental health status items

Table 3 outlines the association between mental health status item scores and subsequent cardiovascular events or death. The items were entered as continuous variables and the HRs reflect the risk of new cardiovascular events or death per one point lower item score. The largest HRs were seen for the 'Vitality' item, HR 1.24 (95% confidence interval 1.09 to 1.42), the 'Mental Health' item 1, HR 1.19 (1.04 to 1.35), and the 'Role-Emotional' item 1, HR 1.16 (1.04 to 1.29).

## DISCUSSION

In this population-based cohort study, we found that low mental health status after first-time MI predicted an increased risk of new cardiovascular events or death in a dose-response manner. The association was explained partly by cardiac disease severity, physical activity, depression, and anxiety. However, even after adjustments for these variables, patients with the lowest mental health status had a more than two-fold higher risk of new cardiovascular events or death compared to those with the highest mental health status.

### Strengths and limitations of the study

Major strengths of this study are its population-based nature and the homogenous study population; we invited all patients with first-time MI during one year in a well-defined area. Our response rate was reasonably high (68.3%), and information on outcome was collected without loss to follow-up. Non-participants tended to have fewer social resources and more comorbid conditions, and they hence resembled the participants with the lowest mental health status. In order to address the potential risk of selection bias, we used antidepressant consumption as a proxy for depressive symptoms similarly to previous studies.<sup>31</sup> The estimates of the association between antidepressant consumption and new cardiovascular events or death in participants and non-participants were similar. Thus, bias due to selection of study participants seems to be an unlikely explanation for our findings.

Information on MI was registered prospectively and did not rely on the participants' or the relatives' memory. The MI diagnosis in the Danish National Patient Register was based on the current European Society of Cardiology criteria for MI, coded by the physician in charge of the discharge, and the information is known to have a high sensitivity (90%) and specificity (92%).<sup>10</sup> The specificity was even higher in our study because we confirmed the MI diagnosis by reviewing the discharge summaries,<sup>9</sup> and this reduced the risk of information bias. We also

1  
2 reduced the risk of information bias by using previously translated and validated scales, pilot  
3 testing the questionnaire among MI patients, and using high-quality register data.

4  
5 We used a new algorithm for the calculation of the MCS score from the SF-12 version 2  
6 using weights constructed by oblique confirmatory factor analysis, which allows the physical  
7 and mental component summary score to be correlated. Fleishman et al developed this new  
8 scoring algorithm<sup>15</sup> due to controversy regarding the traditional scoring algorithm.<sup>32-34</sup> The  
9 traditional scoring algorithm forces mental and physical health to be uncorrelated.  
10 Consequently, when physical scores are well below the mean and mental scores somewhat  
11 less below the mean, as is often the case in patients with physical illness, this scoring method  
12 will result in an artifactual migration of the MCS score towards the mean.<sup>32</sup> In sub-analyses,  
13 we estimated HRs based on traditionally computed MCS scores (Web Extra Supplement Table  
14 B). As expected, they were smaller compared to the HRs based on MCS scores computed with  
15 the new scoring algorithm. We evaluated mental health status three months after MI, allowing  
16 mental health to reach a more stable level after this major life event.

17  
18 A diagnosis of depression or anxiety should ideally be based on a diagnostic interview.  
19 Since a previous study has estimated the sensitivity of the HADS-D $\geq$ 8 for identification of  
20 depression to be 65% in MI patients,<sup>19</sup> a substantial number of participants with depression  
21 may have been misclassified as not having depression. However, we identified 18.3% with  
22 depression in our population (HADS-D $\geq$ 8), which is in keeping with the prevalence of post-MI  
23 depression identified by structured clinical interviews in other studies (19.8%).<sup>1</sup> We found no  
24 studies reporting on the sensitivity and specificity of the HADS-A in an MI population.  
25 However, among acute coronary syndrome patients, a HADS-A $\geq$ 8 had a sensitivity of 91%.<sup>21</sup>  
26 Accordingly, we most likely identified the majority of patients with anxiety. In a sensitivity  
27 analysis, we excluded patients with depression or anxiety (HADS-A/D $\geq$ 8), and this did not  
28 weaken the estimates (Web Extra Supplement Table C).

29  
30 Schizophrenia and bipolar disorder are known to be associated with a higher risk of  
31 mortality, and part of this excess risk is attributable to cardiovascular diseases.<sup>35</sup> We used a  
32 prescription of antipsychotics, between MI and 180 days before, as an approximation of  
33 severe mental disorder. Thirteen participants had redeemed such a prescription. To examine  
34 how much of the association could be explained by these patients, we excluded this group in a  
35 sensitivity analysis (not shown), and this did not weaken the estimates.

36  
37 Lifestyle behaviour was self-reported, and participants with low mental health status may  
38 have been more likely to underreport adverse lifestyle, including physical inactivity. However,  
39 participants with low mental health status did in fact report adverse lifestyle in our study, and  
40  
41  
42  
43  
44  
45  
46  
47  
48  
49  
50  
51  
52  
53  
54  
55  
56  
57  
58  
59  
60

1  
2 a study on depression<sup>36</sup> found no differences when substituting self-reported physical activity  
3 with an objective measure of physical fitness.  
4

5 Information on a range of participant characteristics and the large sample size allowed us  
6 to take into account several potential confounders, such as socio-demographic characteristics,  
7 cardiac disease severity, comorbidity, and behavioural factors. In sub-analyses, we adjusted  
8 for other potential confounders (body mass index, hypertension, history of depression,  
9 antidepressant use, intake of alcohol, fish, and fruit, and participation in phase two cardiac  
10 rehabilitation), but this did not change the estimates ( $\leq 4\%$ ). However, we cannot rule out the  
11 possibility of residual confounding.  
12  
13  
14  
15  
16  
17

### 18 19 **Comparison with other studies**

20 Four previous studies<sup>5-8</sup> have investigated the association between mental health status after  
21 MI and prognosis independent of various clinical risk factors, such as disease severity. They  
22 used different measures of mental health status (COOP charts,<sup>6</sup> Quality of Life after MI  
23 questionnaire,<sup>8</sup> the World Health Organization Quality of Life Instrument Abbreviated,<sup>7</sup> and  
24 SF-12<sup>5</sup>), and they all found an independent association between low mental health status and  
25 higher risk of adverse outcomes. Compared with our study, these studies were conducted in  
26 modest-sized cohorts (n=112,<sup>6</sup> 375,<sup>8</sup> 145<sup>7</sup>), had short follow-up (four to five months,<sup>6</sup> 18  
27 months<sup>8</sup>), mental health status was assessed up to five years or more after MI,<sup>5,7</sup> included  
28 only women<sup>7</sup> or patients who had an ejection fraction  $<30\%$ .<sup>5</sup> Most importantly, none of these  
29 four MI studies took into account important mediators such as depression, anxiety, and  
30 potential behavioural mediators such as physical activity.  
31  
32  
33  
34  
35  
36  
37  
38

39 Our study is the first to explore the association between mental health status after MI and  
40 new cardiovascular events or death in subgroups, and we identified no factors that modified  
41 the risk. However, the sample size was low in some of the subgroups.  
42  
43  
44

45 Our study is also the first to explore the association between mental health status and  
46 cardiovascular events or death on an item level. We found that the 'Vitality' item, the 'Role-  
47 Emotional' item 1, and the 'Mental Health' item 1 were significantly associated with adverse  
48 events after adjustments for clinical, socio-demographic, behavioural, and other psychological  
49 risk factors, whereas the remaining items were not. Our results indicate that these items are  
50 the most important for the association between mental health status (MCS score) and adverse  
51 events. Yet, it is important to keep in mind that the items have different weights and that the  
52 physical items are also included when computing the MCS score.<sup>12, 15</sup>  
53  
54  
55  
56  
57  
58  
59  
60

### Implications for clinicians

In addition to psychological, social, and functional impairment, clinicians should be aware that low mental health status following MI is associated with an increased risk of new cardiovascular events and death. Our results underline the importance of always considering and prioritising mental health issues in post-MI patients. In this study, we identified low mental health status after MI to be a significant risk factor for poor prognosis, independent of clinical, socio-demographic, behavioural, and other psychological risk factors. In other words, mental health status has incremental value in the identification of patients at elevated risk for adverse outcome. Adding mental health status measurement to our present risk factor armamentarium could help clinicians to distinguish between groups of patients with a very low versus a very high risk of adverse outcome, and thereby help identify vulnerable patients in need of optimised care. However, we do not know whether measurement of mental health status and improved knowledge of prognosis will translate into better outcomes for our patients. This is an important focus for future research in this field.

### Possible explanations and future research

This study suggests that mental health status may capture prognostic aspects of mental health which are not captured by measures of depression and anxiety. Further research is needed to clarify more specifically what aspects of mental health that are at play.

The underlying explanation for the association between mental health status after MI and new cardiovascular events or death remains unclear. Our study evaluated cardiac disease severity, behavioural factors, and treatment strategies concurrently with mental health status. We therefore cannot determine whether these factors were the cause or the result of the mental health status. We were unable to assess whether the association was explained by biological mechanisms (such as heart rate variability, platelet function, or inflammatory mechanisms) since we had no information on these biological variables. Future studies should incorporate such biological variables.<sup>37</sup>

Further research is also needed to identify interventions that can improve both mental health status and prognosis in MI patients. Murphy et al<sup>38</sup> examined the effectiveness of a complex intervention designed to improve outcomes, including mental health status (measured with SF-12) for patients with coronary heart disease in a cluster randomised controlled trial. The intervention was “tailored care plans for practices (practice based training in prescribing and behaviour change, administrative support, quarterly newsletter), and tailored care plans for patients (motivational interviewing, goal identification, and target



1  
2 setting for lifestyle change).<sup>38</sup> They found that admissions to hospital were significantly  
3 reduced after an intensive 18-month intervention to improve outcomes for patients with  
4 coronary heart disease, but there was no change in mental health status. It was not stated how  
5 they computed the MCS score, but they probably used the traditional scoring algorithm as the  
6 study were conducted prior to Fleishman's publication.<sup>15</sup> Hence, artifactual migration of the  
7 MCS score towards the mean in these physically ill participants may at least in part explain  
8 the lack of association.  
9  
10  
11  
12  
13

## 14 15 16 **Conclusion**

17 We found that low mental health status following MI was associated with an increased risk of  
18 new cardiovascular events or death. The association was explained partly by cardiac disease  
19 severity, physical activity, depression, and anxiety, but low mental health status remained an  
20 independent prognostic risk factor. Further research is needed to disentangle the pathways  
21 that link mental health status following MI to prognosis and, in continuation hereof, to  
22 identify interventions that can improve both mental health status and prognosis.  
23  
24  
25  
26  
27  
28

29 Contributorship: TJN, and KKL, MV, BC, KSC conceived the study idea and designed the study. KKL collected the data.  
30 TJN, and KKL, MV, BC, KSC reviewed the literature. TJN, and KKL, MV, BC, KSC directed the analyses, which were  
31 carried out by TJN. All authors participated in the discussion and interpretation of the results. TJN organised the writing  
32 and wrote the initial drafts. All authors critically revised the manuscript for intellectual content and approved the final  
33 version. TJN is the guarantor.

34 Funding: The study was supported by the Danish Independent Research Council (grant 12-126032), the Tryg  
35 Foundation (grant number 7844-07), the Danish Health Insurance Foundation (grant number 2010B013) and the  
36 Lundbeck Foundation. None of the funding sources had a role in the design, conduct, analysis, or reporting of the study.

37 Competing interests: All authors have completed the ICMJE uniform disclosure form at [www.icmje.org/coi\\_disclosure.pdf](http://www.icmje.org/coi_disclosure.pdf)  
38 and declare: TJN had financial support from the Danish Independent Research Council for the submitted work; no  
39 financial relationships with any organisations that might have an interest in the submitted work in the previous three  
40 years; no other relationships or activities that could appear to have influenced the submitted work.

41 Ethical approval: Not needed.

42 Data sharing: No additional data available.

43  
44  
45 The Corresponding Author has the right to grant on behalf of all authors and does grant on behalf of all authors, a  
46 [worldwide licence](#) to the Publishers and its licensees in perpetuity, in all forms, formats and media (whether known now  
47 or created in the future), to i) publish, reproduce, distribute, display and store the Contribution, ii) translate the  
48 Contribution into other languages, create adaptations, reprints, include within collections and create summaries, extracts  
49 and/or, abstracts of the Contribution, iii) create any other derivative work(s) based on the Contribution, iv) to exploit all  
50 subsidiary rights in the Contribution, v) the inclusion of electronic links from the Contribution to third party material where-  
51 ever it may be located; and, vi) licence any third party to do any or all of the above.  
52  
53  
54  
55  
56  
57  
58  
59  
60

Table 1 | Baseline characteristics of 880 patients with first-time myocardial infarction in 2009 by quartiles<sup>a</sup> of mental health status (Mental Component Summary score from the Short-Form 12 version 2)

| Variable <sup>b</sup>                                          | Baseline MCS Score                |                                   |                                   |                                   | P Value |
|----------------------------------------------------------------|-----------------------------------|-----------------------------------|-----------------------------------|-----------------------------------|---------|
|                                                                | 1 <sup>st</sup> Quartile<br>n=220 | 2 <sup>nd</sup> Quartile<br>n=220 | 3 <sup>rd</sup> Quartile<br>n=220 | 4 <sup>th</sup> Quartile<br>n=220 |         |
| Self-reported health <sup>e</sup>                              |                                   |                                   |                                   |                                   |         |
| Mental health status (MCS score) <sup>c</sup> , mean (range)   | 28.8<br>(11.1-37.2)               | 42.2<br>(37.2-47.0)               | 51.0<br>(47.0-54.5)               | 57.7<br>(54.5-60.8)               | <.001   |
| HADS-A/D ≥8, No. (%)                                           | 152 (69.7)                        | 79 (36.07)                        | 22 (10.0)                         | 2 (0.91)                          | <.001   |
| Socio-demographic characteristics                              |                                   |                                   |                                   |                                   |         |
| Age, y, mean (SD)                                              | 68.9 (12.4)                       | 68.4 (12.3)                       | 65.6 (11.2)                       | 64.5 (10.0)                       | <.001   |
| Male sex, No. (%)                                              | 120 (54.6)                        | 138 (62.7)                        | 177 (80.5)                        | 173 (78.6)                        | <.001   |
| Cohabitation status, living alone, No. (%) <sup>d</sup>        | 94 (42.7)                         | 82 (37.3)                         | 55 (25.0)                         | 47 (21.4)                         | <.001   |
| Education, No. (%) <sup>d</sup>                                |                                   |                                   |                                   |                                   |         |
| <10 years                                                      | 114 (53.3)                        | 105 (50.2)                        | 85 (39.7)                         | 76 (35.5)                         |         |
| 10-12 years                                                    | 76 (35.5)                         | 81 (38.8)                         | 99 (46.3)                         | 101 (47.2)                        |         |
| >12 years                                                      | 24 (11.2)                         | 23 (11.0)                         | 30 (14.0)                         | 37 (17.3)                         | .004    |
| Labour market status, No. (%) <sup>d</sup>                     |                                   |                                   |                                   |                                   |         |
| Working                                                        | 50 (22.7)                         | 70 (31.8)                         | 99 (45.0)                         | 103 (46.8)                        |         |
| Pension                                                        | 136 (61.8)                        | 123 (55.9)                        | 105 (47.7)                        | 107 (48.6)                        |         |
| Out of the work force                                          | 34 (15.5)                         | 27 (12.3)                         | 16 (7.3)                          | 10 (4.6)                          | <.001   |
| Health status <sup>e</sup>                                     |                                   |                                   |                                   |                                   |         |
| Body mass index, mean (SD)                                     | 26.5 (5.1)                        | 26.3 (4.8)                        | 26.8 (4.5)                        | 26.9 (4.5)                        | .626    |
| Comorbid conditions, No. (%) <sup>f</sup>                      |                                   |                                   |                                   |                                   |         |
| Hypertension <sup>g</sup>                                      | 88 (40.0)                         | 75 (34.1)                         | 54 (24.6)                         | 54 (24.6)                         | <.001   |
| Stroke                                                         | 21 (9.6)                          | 16 (7.3)                          | 7 (3.2)                           | 5 (2.3)                           | .002    |
| TCI                                                            | 12 (5.5)                          | 3 (1.4)                           | 3 (1.4)                           | 10 (4.6)                          | .021    |
| Revascularization                                              | 37 (16.8)                         | 16 (7.3)                          | 12 (5.5)                          | 15 (6.8)                          | <.001   |
| Heart failure                                                  | 16 (7.3)                          | 4 (1.8)                           | 4 (1.8)                           | 4 (1.8)                           | <.001   |
| Diabetes mellitus                                              | 51 (23.2)                         | 38 (17.3)                         | 24 (10.9)                         | 21 (9.6)                          | <.001   |
| Depression <sup>h</sup>                                        | 44 (20.0)                         | 21 (9.6)                          | 11 (5.0)                          | 9 (4.1)                           | <.001   |
| Cardiac disease severity <sup>e</sup>                          |                                   |                                   |                                   |                                   |         |
| MRC dyspnea score ≥3, No. (%)                                  | 110 (50.2)                        | 45 (20.5)                         | 21 (9.6)                          | 3 (1.4)                           | <.001   |
| Medication use, No. (%) <sup>e</sup>                           |                                   |                                   |                                   |                                   |         |
| Aspirin                                                        | 166 (75.5)                        | 168 (76.4)                        | 173 (78.6)                        | 186 (84.6)                        | .086    |
| Clopidogrel                                                    | 159 (72.3)                        | 164 (74.6)                        | 173 (78.6)                        | 184 (83.6)                        | .025    |
| β-blocker                                                      | 174 (79.1)                        | 181 (82.3)                        | 178 (80.9)                        | 180 (81.8)                        | .837    |
| Statin                                                         | 169 (76.8)                        | 184 (83.6)                        | 190 (86.4)                        | 195 (88.6)                        | .005    |
| ACE-inhibitors/AT-II-receptor block                            | 111 (50.5)                        | 111 (50.5)                        | 107 (48.6)                        | 100 (45.5)                        | .689    |
| Furosemide/Aldosterone antagonist                              | 93 (42.3)                         | 64 (29.1)                         | 35 (15.9)                         | 27 (12.3)                         | <.001   |
| Antidepressants                                                | 53 (24.1)                         | 24 (10.9)                         | 9 (4.1)                           | 8 (3.6)                           | <.001   |
| Secondary prophylactic medication                              | 146 (66.4)                        | 160 (72.7)                        | 162 (73.6)                        | 166 (75.5)                        | .163    |
| Potential behavioural mediators <sup>e</sup>                   |                                   |                                   |                                   |                                   |         |
| Alcohol consumption >14/21 units/wk, No. (%)                   | 8 (3.6)                           | 12 (5.5)                          | 8 (3.6)                           | 14 (6.4)                          | .438    |
| Smoking status, No. (%)                                        |                                   |                                   |                                   |                                   |         |
| Current                                                        | 54 (24.8)                         | 49 (22.4)                         | 44 (20.0)                         | 30 (13.6)                         |         |
| Past                                                           | 124 (56.9)                        | 122 (55.7)                        | 121 (55.0)                        | 128 (58.2)                        |         |
| Never                                                          | 40 (18.4)                         | 48 (21.9)                         | 55 (25.0)                         | 62 (28.2)                         | .048    |
| Intake of fruit and vegetables ≥3 portions/d, No. (%)          | 69 (31.4)                         | 75 (34.1)                         | 86 (39.1)                         | 100 (45.5)                        | .013    |
| Intake of fish ≥3 times/d, No. (%)                             | 61 (27.7)                         | 78 (35.5)                         | 93 (42.5)                         | 96 (43.8)                         | .001    |
| Intake of fish oil supplement, No. (%)                         | 57 (25.9)                         | 50 (22.7)                         | 75 (34.1)                         | 69 (31.4)                         | .035    |
| Physical activity, d/wk, mean (SD)                             | 3.6 (2.8)                         | 5.1 (2.3)                         | 5.3 (2.1)                         | 5.7 (1.8)                         | <.001   |
| Participation in phase two cardiac rehabilitation <sup>e</sup> | 110 (50.2)                        | 119 (54.1)                        | 144 (65.5)                        | 142 (64.8)                        | .001    |

Abbreviations: MRC, Medical Research Council; ACE, angiotensin converting enzyme; AT, angiotensin; HADS-A/D, Hospital Anxiety and Depression Scale-Anxiety/Depression; MCS, Mental Component Summary.

<sup>a</sup>1st quartile had the lowest MCS score; 4<sup>th</sup> quartile had the highest MCS score.

<sup>b</sup>Totals may not sum to their respective totals due to missing data. No variable had more than 3.3% missing data.

<sup>c</sup>Norm-based scoring (1998 U.S. population) using weights derived from confirmatory factor analysis.

<sup>d</sup>Information collected the year before MI (in 2008). <sup>e</sup>Information collected three months after MI. <sup>f</sup>Information collected at the time of MI.

<sup>g</sup>Redeemed prescription for at least two classes of antihypertensive drugs between MI and 180 days before.

<sup>h</sup>Redeemed prescription for antidepressants between MI and 180 days before.

Figure 1 | Kaplan-Meier curves by quartiles of mental health status (Mental Component Summary score from the Short-Form 12 version 2)

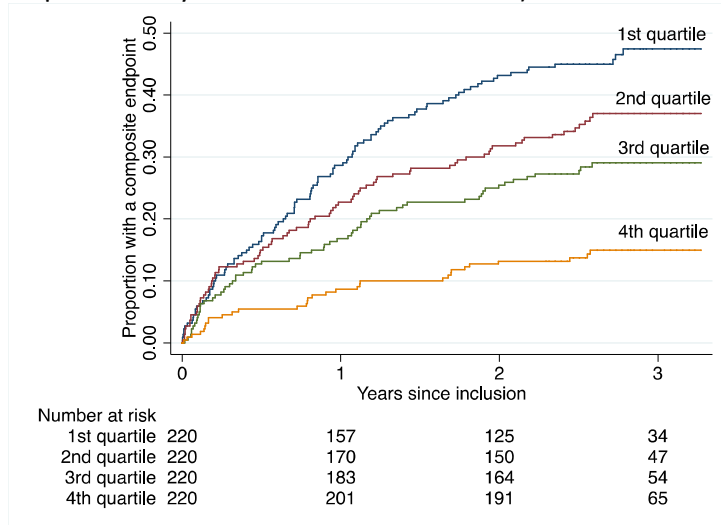

Table 2 | Association between mental health status (Mental Component Summary score from the Short-Form 12 version 2) and subsequent cardiovascular events or death, with sequential adjustment for potential confounders

| Adjusted variables <sup>a</sup>                | Hazard ratio (95% confidence interval)              |                                                    |                                                    |                                                    |
|------------------------------------------------|-----------------------------------------------------|----------------------------------------------------|----------------------------------------------------|----------------------------------------------------|
|                                                | 1 <sup>st</sup> Quartile MCS (102/220) <sup>b</sup> | 2 <sup>nd</sup> Quartile MCS (80/220) <sup>b</sup> | 3 <sup>rd</sup> Quartile MCS (63/220) <sup>b</sup> | 4 <sup>th</sup> Quartile MCS (32/220) <sup>b</sup> |
| Age                                            | 3.53 (2.36 to 5.27)                                 | 2.67 (1.77 to 4.03)                                | 2.09 (1.36 to 3.19)                                | 1 (reference)                                      |
| Socio-demographic characteristics <sup>c</sup> | 3.56 (2.35 to 5.38)                                 | 2.57 (1.69 to 3.92)                                | 2.06 (1.34 to 3.16)                                | 1 (reference)                                      |
| MRC dyspnea score $\geq 3$                     | 2.74 (1.76 to 4.26)                                 | 2.30 (1.50 to 3.53)                                | 1.96 (1.27 to 3.00)                                | 1 (reference)                                      |
| Comorbidity <sup>d</sup>                       | 2.65 (1.70 to 4.13)                                 | 2.29 (1.50 to 3.51)                                | 1.99 (1.29 to 3.05)                                | 1 (reference)                                      |
| Secondary prophylactic medication              | 2.77 (1.78 to 4.31)                                 | 2.32 (1.51 to 3.56)                                | 1.95 (1.27 to 2.99)                                | 1 (reference)                                      |
| Smoking status                                 | 2.76 (1.76 to 4.31)                                 | 2.31 (1.51 to 3.56)                                | 1.96 (1.27 to 3.01)                                | 1 (reference)                                      |
| Physical activity                              | 2.47 (1.56 to 3.91)                                 | 2.25 (1.47 to 3.46)                                | 1.89 (1.23 to 2.91)                                | 1 (reference)                                      |
| HADS-A/D score $\geq 8$                        | 2.26 (1.37 to 3.73)                                 | 2.15 (1.38 to 3.35)                                | 1.87 (1.21 to 2.88)                                | 1 (reference)                                      |

Abbreviations: MCS, Mental Component Summary; HADS-A/D, Hospital Anxiety and Depression Scale-Anxiety/Depression; MRC, Medical Research Council.

<sup>a</sup> Each model includes the variables from the preceding row so that the final model includes all the variables listed in this table.

<sup>b</sup> No. of outcomes/no. of persons in quartile.

<sup>c</sup> Sex, cohabitation status, education, labour market status. <sup>d</sup> History of stroke, diabetes mellitus, or heart failure.

Table 3 | Association between mental health status item scores (continuous; per one point lower item score) and subsequent cardiovascular events or death, with sequential adjustment for potential confounders and mediators

| Adjusted variables <sup>a</sup>                | Hazard ratio (95% confidence interval) |                     |                     |                     |                     |                     |
|------------------------------------------------|----------------------------------------|---------------------|---------------------|---------------------|---------------------|---------------------|
|                                                | Vitality                               | Role-Emotional 1    | Role-Emotional 2    | Social Functioning  | Mental Health 1     | Mental Health 2     |
| Age                                            | 1.41 (1.27 to 1.56)                    | 1.29 (1.18 to 1.41) | 1.26 (1.15 to 1.37) | 1.23 (1.12 to 1.35) | 1.31 (1.18 to 1.46) | 1.21 (1.09 to 1.35) |
| Socio-demographic characteristics <sup>b</sup> | 1.41 (1.26 to 1.57)                    | 1.31 (1.19 to 1.43) | 1.28 (1.17 to 1.41) | 1.21 (1.10 to 1.34) | 1.33 (1.19 to 1.48) | 1.21 (1.08 to 1.36) |
| MRC dyspnea score $\geq 3$                     | 1.30 (1.16 to 1.47)                    | 1.21 (1.10 to 1.34) | 1.18 (1.07 to 1.31) | 1.12 (1.01 to 1.24) | 1.24 (1.11 to 1.40) | 1.11 (0.98 to 1.25) |
| Comorbidity <sup>c</sup>                       | 1.28 (1.14 to 1.44)                    | 1.21 (1.09 to 1.33) | 1.16 (1.05 to 1.28) | 1.10 (0.99 to 1.22) | 1.25 (1.11 to 1.40) | 1.11 (0.98 to 1.25) |
| Secondary prophylactic medication              | 1.31 (1.17 to 1.48)                    | 1.22 (1.11 to 1.35) | 1.18 (1.07 to 1.31) | 1.12 (1.01 to 1.24) | 1.24 (1.11 to 1.40) | 1.11 (0.98 to 1.25) |
| Smoking status                                 | 1.31 (1.17 to 1.48)                    | 1.22 (1.10 to 1.34) | 1.18 (1.06 to 1.30) | 1.12 (1.00 to 1.24) | 1.25 (1.11 to 1.41) | 1.11 (0.98 to 1.25) |
| Physical activity                              | 1.27 (1.13 to 1.44)                    | 1.18 (1.07 to 1.31) | 1.14 (1.03 to 1.27) | 1.08 (0.97 to 1.21) | 1.22 (1.09 to 1.38) | 1.07 (0.95 to 1.21) |
| HADS-A/D score $\geq 8$                        | 1.24 (1.09 to 1.42)                    | 1.16 (1.04 to 1.29) | 1.11 (0.99 to 1.24) | 1.03 (0.91 to 1.16) | 1.19 (1.04 to 1.35) | 1.00 (0.87 to 1.16) |

Abbreviations: HADS-A/D, Hospital Anxiety and Depression Scale-Anxiety/Depression; MRC, Medical Research Council.

<sup>a</sup> Each model includes the variables from the preceding row so that the final model includes all the variables listed in this table.

<sup>b</sup> Sex, cohabitation status, education, labour market status. <sup>c</sup> History of stroke, diabetes mellitus, or heart failure.

Figure 2 | Association between baseline mental health status (median cut) and subsequent cardiovascular events or death for patients with myocardial infarction and specific characteristics

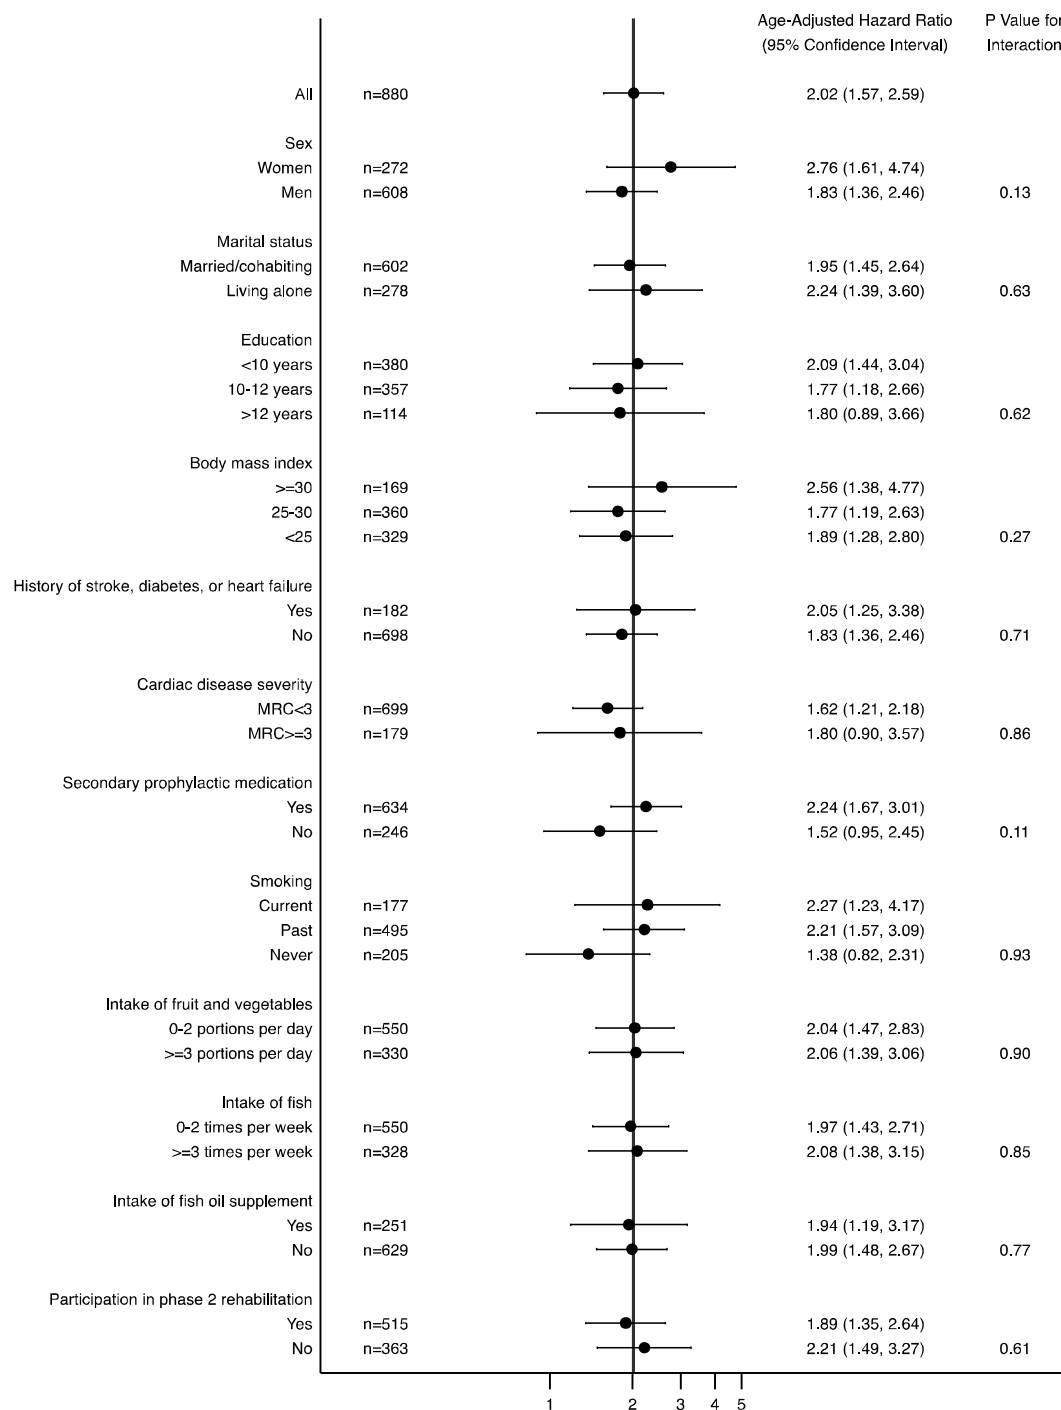

## WEB EXTRA SUPPLEMENT

Table A | Comparison of participants and non-participants

| Variable                                                | Participants<br>(n=880) | Non-participants<br>(n=408) | P<br>Value |
|---------------------------------------------------------|-------------------------|-----------------------------|------------|
| Socio-demographic characteristics                       |                         |                             |            |
| Age, y, mean (SD)                                       | 66.8 (11.7)             | 72.1 (14.7)                 | <.001      |
| Male sex, No. (%)                                       | 608 (69.1)              | 226 (55.4)                  | <.001      |
| Cohabitation status, living alone, No. (%) <sup>a</sup> | 278 (31.6)              | 230 (56.4)                  | <.001      |
| Education, No. (%) <sup>a</sup>                         |                         |                             |            |
| <10 years                                               | 380 (44.7)              | 206 (58.2)                  |            |
| 10-12 years                                             | 357 (42.0)              | 112 (31.6)                  |            |
| >12 years                                               | 114 (13.4)              | 36 (10.2)                   | <.001      |
| Labour market status, No. (%) <sup>a</sup>              |                         |                             |            |
| Working                                                 | 322 (36.6)              | 75 (18.4)                   |            |
| Pension                                                 | 471 (53.5)              | 283 (69.4)                  |            |
| Out of the work force                                   | 87 (9.9)                | 50 (12.3)                   | <.001      |
| Comorbid conditions, No. (%) <sup>b</sup>               |                         |                             |            |
| Stroke                                                  | 49 (5.6)                | 45 (11.0)                   | <.001      |
| Revascularization                                       | 80 (9.1)                | 35 (8.6)                    | .764       |
| Congestive heart failure                                | 28 (3.2)                | 45 (11.0)                   | <.001      |
| Diabetes mellitus                                       | 134 (15.2)              | 101 (24.8)                  | <.001      |
| Depression <sup>c</sup>                                 | 85 (9.7)                | 93 (22.8)                   | <.001      |

<sup>a</sup>Information collected the year before MI (in 2008).<sup>b</sup>Information collected at the time of MI.

Table B | Association between mental health status (Mental Component Summary score from the Short-Form 12 version 2; traditional scoring method) and subsequent cardiovascular events or death, with sequential adjustment for potential confounders

| Adjusted variables <sup>a</sup>                | Hazard ratio (95% confidence interval)                |                                                       |                                                       |                                                       |
|------------------------------------------------|-------------------------------------------------------|-------------------------------------------------------|-------------------------------------------------------|-------------------------------------------------------|
|                                                | 1 <sup>st</sup> quartile MCS<br>(96/220) <sup>b</sup> | 2 <sup>nd</sup> quartile MCS<br>(70/220) <sup>b</sup> | 3 <sup>rd</sup> quartile MCS<br>(64/225) <sup>b</sup> | 4 <sup>th</sup> quartile MCS<br>(47/215) <sup>b</sup> |
| Age                                            | 2.40 (1.69 to 3.40)                                   | 1.60 (1.10 to 2.31)                                   | 1.40 (0.96 to 2.04)                                   | 1 (reference)                                         |
| Socio-demographic characteristics <sup>c</sup> | 2.50 (1.74 to 3.61)                                   | 1.62 (1.10 to 2.37)                                   | 1.43 (0.97 to 2.11)                                   | 1 (reference)                                         |
| MRC dyspnea score $\geq 3$                     | 1.94 (1.32 to 2.85)                                   | 1.49 (1.01 to 2.19)                                   | 1.33 (0.90 to 1.97)                                   | 1 (reference)                                         |
| Comorbidity <sup>d</sup>                       | 1.92 (1.30 to 2.83)                                   | 1.52 (1.03 to 2.23)                                   | 1.40 (0.95 to 2.07)                                   | 1 (reference)                                         |
| Secondary prophylactic medication              | 1.94 (1.32 to 2.86)                                   | 1.49 (1.01 to 2.19)                                   | 1.34 (0.91 to 1.98)                                   | 1 (reference)                                         |
| Smoking status                                 | 1.93 (1.31 to 2.84)                                   | 1.45 (0.99 to 2.14)                                   | 1.34 (0.90 to 1.98)                                   | 1 (reference)                                         |
| Physical activity                              | 1.76 (1.19 to 2.62)                                   | 1.41 (0.96 to 2.08)                                   | 1.32 (0.89 to 1.95)                                   | 1 (reference)                                         |
| HADS-A/D score $\geq 8$                        | 1.57 (1.01 to 2.45)                                   | 1.33 (0.89 to 1.99)                                   | 1.30 (0.88 to 1.93)                                   | 1 (reference)                                         |

Abbreviations: MCS, Mental Component Summary; HADS-A/D, Hospital Anxiety and Depression Scale-Anxiety/Depression. MRC, Medical Research Council.

<sup>a</sup> Each model includes the variables from the preceding row so that the final model includes all the variables listed in this table.<sup>b</sup> No. of outcomes/no. of persons in quartile.<sup>c</sup> Sex, cohabitation status, education, labour market status. <sup>d</sup> History of stroke, diabetes mellitus, or heart failure.

Table C | Stratified analysis for those without depression and anxiety, n=622. Association between mental health status (Mental Component Summary score from the Short-Form 12 version 2) and subsequent cardiovascular events or death, with sequential adjustment for potential confounders and mediators

| Adjusted variables <sup>a</sup>                | Hazard ratio (95% confidence interval)                |                                                       |                                                       |                                                       |
|------------------------------------------------|-------------------------------------------------------|-------------------------------------------------------|-------------------------------------------------------|-------------------------------------------------------|
|                                                | 1 <sup>st</sup> quartile MCS<br>(63/155) <sup>b</sup> | 2 <sup>nd</sup> quartile MCS<br>(48/156) <sup>b</sup> | 3 <sup>rd</sup> quartile MCS<br>(38/154) <sup>b</sup> | 4 <sup>th</sup> quartile MCS<br>(19/157) <sup>b</sup> |
| Age                                            | 3.39 (2.01 to 5.73)                                   | 2.63 (1.55 to 4.49)                                   | 2.20 (1.27 to 3.81)                                   | 1 (reference)                                         |
| Socio-demographic characteristics <sup>c</sup> | 3.49 (2.04 to 5.98)                                   | 2.59 (1.51 to 4.44)                                   | 2.05 (1.17 to 3.56)                                   | 1 (reference)                                         |
| MRC dyspnea score $\geq 3$                     | 3.15 (1.81 to 5.48)                                   | 2.45 (1.42 to 4.22)                                   | 2.00 (1.15 to 3.48)                                   | 1 (reference)                                         |
| Comorbidity <sup>d</sup>                       | 3.03 (1.74 to 5.29)                                   | 2.44 (1.42 to 4.19)                                   | 1.91 (1.10 to 3.34)                                   | 1 (reference)                                         |
| Secondary prophylactic medication              | 3.22 (1.85 to 5.59)                                   | 2.44 (1.42 to 4.20)                                   | 2.02 (1.16 to 3.52)                                   | 1 (reference)                                         |
| Smoking status                                 | 3.13 (1.79 to 5.46)                                   | 2.52 (1.46 to 4.33)                                   | 1.99 (1.14 to 3.46)                                   | 1 (reference)                                         |
| Physical activity                              | 3.03 (1.72 to 5.34)                                   | 2.49 (1.44 to 4.29)                                   | 1.97 (1.13 to 3.43)                                   | 1 (reference)                                         |

Abbreviations: MCS, Mental Component Summary; MRC, Medical Research Council.

<sup>a</sup> Each model includes the variables from the preceding row so that the final model includes all the variables listed in this table.<sup>b</sup> No. of outcomes/no. of persons in quartile.<sup>c</sup> Sex, cohabitation status, education, labour market status. <sup>d</sup> History of stroke, diabetes mellitus, or heart failure.

**eFigure 1 | The 6 mental health status items from the Short-Form 12 version 2**

4. During the past 4 weeks, how much of the time have you had any of the following problems with your work or other regular daily activities as a result of any emotional problems (such as feeling depressed or anxious)?

- a. Accomplished less than you would like.
- b. Did work or other activities less carefully than usual.

6. These questions are about how you feel and how things have been with you during the past 4 weeks. For each question, please give the one answer that comes closest to the way you have been feeling. How much of the time during the past 4 weeks...

- a. Have you felt calm and peaceful?
- b. Did you have a lot of energy?
- c. Have you felt downhearted and depressed?

7. During the past 4 weeks, how much of the time has your physical health or emotional problems interfered with your social activities (like visiting friends, relatives, etc.)?

The options for all of the items are:

All of the time, most of the time, some of the time, a little of the time, none of the time.

*4a: Role-Emotional item 1.*

*4b: Role-Emotional item 2.*

*6a: Mental Health item 1.*

*6b: Vitality.*

*6c: Mental Health item 2.*

*7: Social Functioning.*

- 1  
2  
3  
4  
5  
6  
7  
8  
9  
10  
11  
12  
13  
14  
15  
16  
17  
18  
19  
20  
21  
22  
23  
24  
25  
26  
27  
28  
29  
30  
31  
32  
33  
34  
35  
36  
37  
38  
39  
40  
41  
42  
43  
44  
45  
46  
47  
48  
49  
50  
51  
52  
53  
54  
55  
56  
57  
58  
59  
60
1. Thombs BD, Bass EB, Ford DE, Stewart KJ, Tsilidis KK, Patel U, et al. Prevalence of depression in survivors of acute myocardial infarction - Review of the evidence. *Journal of General Internal Medicine* 2006; JAN 2006;21(1).
2. Roest AM, Martens EJ, Denollet J, de Jonge P. Prognostic Association of Anxiety Post Myocardial Infarction With Mortality and New Cardiac Events: A Meta-Analysis. *Psychosom Med* 2010; JUL-AUG 2010;72(6).
3. Crilley JG, Farrer M. Impact of first myocardial infarction on self-perceived health status. *QJM* 2001; Jan;94(1):13-8.
4. Meijer A, Conradi HJ, Bos EH, Thombs BD, van Melle KP, de Jonge P. Prognostic association of depression following myocardial infarction with mortality and cardiovascular events: a meta-analysis of 25 years of research. *Gen Hosp Psychiatry* 2011; MAY-JUN;33(3):203-16.
5. Piotrowicz K, Noyes K, Lyness JM, McNitt S, Andrews ML, Dick A, et al. Physical functioning and mental well-being in association with health outcome in patients enrolled in the Multicenter Automatic Defibrillator Implantation Trial II. *Eur Heart J* 2007; Mar;28(5):601-7.
6. Nelson EC, Ferreira PL, Cleary PD, Gustafson D, Wasson JH. Do patients' health status reports predict future hospital stays for patients with an acute myocardial infarction?. *Fam Pract Res J* 1994; Jun;14(2):119-26.
7. Norekval TM, Fridlund B, Rokne B, Segadal L, Wentzel-Larsen T, Nordrehaug JE. Patient-reported outcomes as predictors of 10-year survival in women after acute myocardial infarction. *Health and Quality of Life Outcomes* 2010; NOV 25 2010;8:140.
8. Lim LLY, Johnson NA, O'Connell RL, Heller RF. Quality of life and later adverse health outcomes in patients with suspected heart attack. *Aust N Z J Public Health* 1998; AUG 1998;22(5).
9. Larsen KK, Vestergaard M, Sondergaard J, Christensen B. Rehabilitation status three months after first-time myocardial infarction. *Scand J Prim Health Care* 2011; Dec;29(4):210-5.

- 1  
2  
3  
4  
5  
6  
7  
8  
9  
10  
11  
12  
13  
14  
15  
16  
17  
18  
19  
20  
21  
22  
23  
24  
25  
26  
27  
28  
29  
30  
31  
32  
33  
34  
35  
36  
37  
38  
39  
40  
41  
42  
43  
44  
45  
46  
47  
48  
49  
50  
51  
52  
53  
54  
55  
56  
57  
58  
59  
60
10. Joensen AM, Jensen MK, Overvad K, Dethlefsen C, Schmidt E, Rasmussen L, et al. Predictive values of acute coronary syndrome discharge diagnoses differed in the Danish National Patient Registry. *J Clin Epidemiol* 2009; FEB;62(2):188-94.
11. Pedersen CB. The Danish Civil Registration System. *Scand J Public Health* 2011; Jul;39(7 Suppl):22-5.
12. Kosinski M, Ware JE, Turner-Bowker DM, Gandek B. *User's manual for the SF-12v2 health survey : with a supplement documenting the SF-12® health survey*. Lincoln, RI: QualityMetric incorporated; 2007.
13. Ware JE, Kosinski M, Keller SD. A 12-item short-form health survey - Construction of scales and preliminary tests of reliability and validity. *Med Care* 1996; MAR 1996;34(3).
14. Gandek B, Ware JE, Aaronson NK, Apolone G, Bjorner JB, Brazier JE, et al. Cross-validation of item selection and scoring for the SF-12 Health Survey in nine countries: results from the IQOLA Project. International Quality of Life Assessment. *J Clin Epidemiol* 1998; Nov;51(11):1171-8.
15. Fleishman JA, Selim AJ, Kazis LE. Deriving SF-12v2 physical and mental health summary scores: a comparison of different scoring algorithms. *Quality of Life Research* 2010; MAR 2010;19(2).
16. Zigmond AS, Snaith RP. The Hospital Anxiety and Depression Scale. *Acta Psychiatr Scand* 1983; 1983;67(6).
17. Johnston M, Pollard B, Hennessey P. Construct validation of the hospital anxiety and depression scale with clinical populations. *J Psychosom Res* 2000; JUN 2000;48(6).
18. Martin C, Lewin R, Thompson D. A confirmatory factor analysis of the Hospital Anxiety and Depression Scale in coronary care patients following acute myocardial infarction. *Psychiatry Res* 2003; AUG 2003;120(1):85-94.
19. Thombs BD, Magyar-Russell G, Bass EB, Stewart KJ, Tsilidis KK, Bush DE, et al. Performance characteristics of depression screening instruments in survivors of acute myocardial infarction: Review of the evidence. *Psychosomatics* 2007; JUN 2007;48(3).



- 1  
2 20. Bjelland I, Dahl AA, Haug TT, Neckelmann D. The validity of the Hospital Anxiety and Depression  
3 Scale. An updated literature review. *J Psychosom Res* 2002; Feb;52(2):69-77.  
4  
5  
6  
7 21. Frasure-Smith N, Lesperance F. Depression and anxiety as predictors of 2-year cardiac events in patients  
8 with stable coronary artery disease. *Arch Gen Psychiatry* 2008; Jan;65(1):62-71.  
9  
10  
11  
12 22. Andersen TF, Madsen M, Jorgensen J, Mellekjoe L, Olsen JH. The Danish National Hospital Register.  
13 A valuable source of data for modern health sciences. *Dan Med Bull* 1999; Jun;46(3):263-8.  
14  
15  
16  
17 23. Carstensen B, Kristensen JK, Marcussen MM, Borch-Johnsen K. The National Diabetes Register. *Scand*  
18 *J Public Health* 2011; JUL;39:58-61.  
19  
20  
21  
22 24. Johannsdottir SA, Horvath-Puho E, Ehrenstein V, Schmidt M, Pedersen L, Sorensen HT. Existing data  
23 sources for clinical epidemiology: The Danish National Database of Reimbursed Prescriptions. *Clin*  
24 *Epidemiol* 2012;4:303-13.  
25  
26  
27  
28  
29  
30 25. Fletcher C. Standardized questionnaires on respiratory symptoms. A statement prepared for, and approved  
31 by, the Medical Research Council's Committee on the aetiology of chronic bronchitis. *Br Med J*  
32 1960;2:1665.  
33  
34  
35  
36  
37 26. Vestbo J, Knudsen KM, Rasmussen FV. Should we Continue using Questionnaires on Breathlessness in  
38 Epidemiologic Surveys. *Am Rev Respir Dis* 1988; MAY 1988;137(5).  
39  
40  
41  
42 27. Ades PA. Cardiac rehabilitation and secondary prevention of coronary heart disease. *N Engl J Med* 2001;  
43 Sep 20;345(12):892-902.  
44  
45  
46  
47 28. Giannuzzi P, Saner H, Bjornstad H, Fioretti P, Mendes M, Cohen-Solal A, et al. Secondary prevention  
48 through cardiac rehabilitation: position paper of the Working Group on Cardiac Rehabilitation and Exercise  
49 Physiology of the European Society of Cardiology. *Eur Heart J* 2003; Jul;24(13):1273-8.  
50  
51  
52  
53  
54  
55 29. Statistics Denmark. *IDA: An integrated database for labour market research: Main report*. Copenhagen,  
56 Denmark: Statistics Denmark; 1991.  
57  
58  
59  
60

- 1  
2  
3  
4  
5  
6  
7  
8  
9  
10  
11  
12  
13  
14  
15  
16  
17  
18  
19  
20  
21  
22  
23  
24  
25  
26  
27  
28  
29  
30  
31  
32  
33  
34  
35  
36  
37  
38  
39  
40  
41  
42  
43  
44  
45  
46  
47  
48  
49  
50  
51  
52  
53  
54  
55  
56  
57  
58  
59  
60
30. Wetherill G, Duncombe P, Kenward M. *Regression Analysis with Applications*. London: Capman and Hall; 1986.
31. Barnett K, Mercer SW, Norbury M, Watt G, Wyke S, Guthrie B. Epidemiology of multimorbidity and implications for health care, research, and medical education: a cross-sectional study. *Lancet* 2012; Jul 7;380(9836):37-43.
32. Farivar SS, Cunningham WE, Hays RD. Correlated physical and mental health summary scores for the SF-36 and SF-12 Health Survey, V.I. *Health and Quality of Life Outcomes* 2007; SEP 7 2007;5:54.
33. Pelle AJ, Kupper N, Mols F, de Jonge P. What is the use? Application of the short form (SF) questionnaires for the evaluation of treatment effects. *Qual Life Res* 2012; Sep 14;.
34. Hann M, Reeves D. The SF-36 scales are not accurately summarised by independent physical and mental component scores. *Quality of Life Research* 2008; APR 2008;17(3).
35. Hoang U, Stewart R, Goldacre MJ. Mortality after hospital discharge for people with schizophrenia or bipolar disorder: retrospective study of linked English hospital episode statistics, 1999-2006. *BMJ* 2011; Sep 13;343:d5422.
36. Whooley MA, de Jonge P, Vittinghoff E, Otte C, Moos R, Carney RM, et al. Depressive Symptoms, Health Behaviors, and Risk of Cardiovascular Events in Patients With Coronary Heart Disease. *Jama-Journal of the American Medical Association* 2008; NOV 26 2008;300(20).
37. Rumsfeld JS, Ho PM. Depression and cardiovascular disease: a call for recognition. *Circulation* 2005; Jan 25;111(3):250-3.
38. Murphy AW, Cupples ME, Smith SM, Byrne M, Byrne MC, Newell J, et al. Effect of tailored practice and patient care plans on secondary prevention of heart disease in general practice: cluster randomised controlled trial. *BMJ* 2009; Oct 29;339:b4220.

STROBE 2007 (v4) Statement—Checklist of items that should be included in reports of cohort studies

| Section/Topic                | Item # | Recommendation                                                                                                                                                                       | Reported on page # |
|------------------------------|--------|--------------------------------------------------------------------------------------------------------------------------------------------------------------------------------------|--------------------|
| Title and abstract           | 1      | (a) Indicate the study’s design with a commonly used term in the title or the abstract                                                                                               | 1                  |
|                              |        | (b) Provide in the abstract an informative and balanced summary of what was done and what was found                                                                                  | 2                  |
| <b>Introduction</b>          |        |                                                                                                                                                                                      |                    |
| Background/rationale         | 2      | Explain the scientific background and rationale for the investigation being reported                                                                                                 | 3                  |
| Objectives                   | 3      | State specific objectives, including any prespecified hypotheses                                                                                                                     | 3                  |
| <b>Methods</b>               |        |                                                                                                                                                                                      |                    |
| Study design                 | 4      | Present key elements of study design early in the paper                                                                                                                              | 3-4                |
| Setting                      | 5      | Describe the setting, locations, and relevant dates, including periods of recruitment, exposure, follow-up, and data collection                                                      | 3-4, 6             |
| Participants                 | 6      | (a) Give the eligibility criteria, and the sources and methods of selection of participants. Describe methods of follow-up                                                           | 3-4, 6             |
|                              |        | (b) For matched studies, give matching criteria and number of exposed and unexposed                                                                                                  | -                  |
| Variables                    | 7      | Clearly define all outcomes, exposures, predictors, potential confounders, and effect modifiers. Give diagnostic criteria, if applicable                                             | 3-6                |
| Data sources/<br>measurement | 8*     | For each variable of interest, give sources of data and details of methods of assessment (measurement). Describe comparability of assessment methods if there is more than one group | 3-6                |
| Bias                         | 9      | Describe any efforts to address potential sources of bias                                                                                                                            | 6-7, 9-11          |
| Study size                   | 10     | Explain how the study size was arrived at                                                                                                                                            | 3                  |
| Quantitative variables       | 11     | Explain how quantitative variables were handled in the analyses. If applicable, describe which groupings were chosen and why                                                         | 4-7                |
| Statistical methods          | 12     | (a) Describe all statistical methods, including those used to control for confounding                                                                                                | 6-7                |
|                              |        | (b) Describe any methods used to examine subgroups and interactions                                                                                                                  | 7                  |
|                              |        | (c) Explain how missing data were addressed                                                                                                                                          | 7                  |
|                              |        | (d) If applicable, explain how loss to follow-up was addressed                                                                                                                       | -                  |
|                              |        | (e) Describe any sensitivity analyses                                                                                                                                                | 6-7, 10-11         |
| <b>Results</b>               |        |                                                                                                                                                                                      |                    |

|                          |     |                                                                                                                                                                                                              |          |
|--------------------------|-----|--------------------------------------------------------------------------------------------------------------------------------------------------------------------------------------------------------------|----------|
| Participants             | 13* | (a) Report numbers of individuals at each stage of study—eg numbers potentially eligible, examined for eligibility, confirmed eligible, included in the study, completing follow-up, and analysed            | 3, 8     |
|                          |     | (b) Give reasons for non-participation at each stage                                                                                                                                                         | 3        |
|                          |     | (c) Consider use of a flow diagram                                                                                                                                                                           | 3        |
| Descriptive data         | 14* | (a) Give characteristics of study participants (eg demographic, clinical, social) and information on exposures and potential confounders                                                                     | 8, 14    |
|                          |     | (b) Indicate number of participants with missing data for each variable of interest                                                                                                                          | 7        |
|                          |     | (c) Summarise follow-up time (eg, average and total amount)                                                                                                                                                  | 8        |
| Outcome data             | 15* | Report numbers of outcome events or summary measures over time                                                                                                                                               | 8, 15    |
| Main results             | 16  | (a) Give unadjusted estimates and, if applicable, confounder-adjusted estimates and their precision (eg, 95% confidence interval). Make clear which confounders were adjusted for and why they were included | 7-9, 15  |
|                          |     | (b) Report category boundaries when continuous variables were categorized                                                                                                                                    | 14       |
|                          |     | (c) If relevant, consider translating estimates of relative risk into absolute risk for a meaningful time period                                                                                             | 8, 15    |
| Other analyses           | 17  | Report other analyses done—eg analyses of subgroups and interactions, and sensitivity analyses                                                                                                               | 8, 10-11 |
| <b>Discussion</b>        |     |                                                                                                                                                                                                              |          |
| Key results              | 18  | Summarise key results with reference to study objectives                                                                                                                                                     | 9-13     |
| <b>Limitations</b>       |     |                                                                                                                                                                                                              |          |
| Interpretation           | 20  | Give a cautious overall interpretation of results considering objectives, limitations, multiplicity of analyses, results from similar studies, and other relevant evidence                                   | 9-13     |
| Generalisability         | 21  | Discuss the generalisability (external validity) of the study results                                                                                                                                        | 9        |
| <b>Other information</b> |     |                                                                                                                                                                                                              |          |
| Funding                  | 22  | Give the source of funding and the role of the funders for the present study and, if applicable, for the original study on which the present article is based                                                | 13       |

\*Give information separately for cases and controls in case-control studies and, if applicable, for exposed and unexposed groups in cohort and cross-sectional studies.

**Note:** An Explanation and Elaboration article discusses each checklist item and gives methodological background and published examples of transparent reporting. The STROBE checklist is best used in conjunction with this article (freely available on the Web sites of PLoS Medicine at <http://www.plosmedicine.org/>, Annals of Internal Medicine at <http://www.annals.org/>, and Epidemiology at <http://www.epidem.com/>). Information on the STROBE Initiative is available at [www.strobe-statement.org](http://www.strobe-statement.org).
